# Supplementary material for: Isomer Molecular Structures and Formation Pathways of Oxygenated Organic Molecules in Newly Formed Biogenic Particles
Source: Copernicus journal article supplement (doi:10.5194/egusphere-2024-2454), 2024-08-06
Supplement: Supplementary file 1 [file egusphere-2024-2454-supplement.pdf]

1 Supporting Information

2  
3 **Isomer Molecular Structures and Formation Pathways of Oxygenated Organic Molecules**  
4 **in Newly Formed Biogenic Particles**

5  
6 Vignesh Vasudevan-Geetha<sup>1</sup>, Lee Tiszenkel<sup>1</sup>, Zhizhao Wang<sup>2,3</sup>, Robin Russo<sup>4</sup>, Daniel J. Bryant<sup>5</sup>,  
7 Julia Lee-Taylor<sup>3</sup>, Kelley C. Barsanti<sup>3</sup>, Shan-Hu Lee<sup>1,4\*</sup>

8  
9 <sup>1</sup>Department of Atmospheric and Earth Sciences, University of Alabama in Huntsville,  
10 Huntsville, AL 35805, United States

11 <sup>2</sup>Department of Chemical and Environmental Engineering, University of California - Riverside,  
12 Riverside, CA 92521, United States

13 <sup>3</sup>Atmospheric Chemistry Observation & Modeling Laboratory, National Center for Atmospheric  
14 Chemistry, Boulder, CO 30807, United States

15  
16 <sup>4</sup>Department of Chemistry, University of Alabama in Huntsville, Huntsville, AL 35805, United  
17 States

18 <sup>5</sup>Department of Chemistry, University of York, York, YO10 5DD, United Kingdom

19  
20 \*Corresponding author (shanhu.lee@uah.edu)

21  
22 Supplementary text

23 Tables S1 to S3

24 Figures S1 to S7

25 Reactions schemes S1 to S4

26 Supplement references

27

## 28 Supplement Text

### 29 UPLC/(-)ESI-Orbitrap MS/MS analysis

30 A broad-range mass and system calibration was done using Pierce<sup>TM</sup> Flex Mix calibrant solution  
31 (ThermoFisher Scientific) before running the filter samples, and each LC run was preceded by a  
32 single-point internal mass calibration (EASY-IC). The mass-to-charge ( $m/z$ ) scan range was 50-  
33 750 with the RF lens set at 70%. The automatic gain control (AGC) target and maximum injection  
34 time were set to “standard” and “auto,” respectively. The MS/MS method included a “targeted  
35 mass exclusion” filter that guided the instrument not to fragment the top 500  $m/z$  that were also  
36 detected in the procedural blank, which allowed only the desirable compounds in the filter sample  
37 to be fragmented.

38 The chromatographic data analysis is achieved using the Compound Discoverer software (version  
39 3.3 SP2, Thermo Fisher Scientific). All the replicate samples can be processed together and easily  
40 analyzed within one data-processing run. This program was required to classify the input data files  
41 into ‘sample,’ ‘blank,’ (includes a solvent and procedural blank), and ‘identification only’ (includes  
42 MS<sup>2</sup> run for assigning MS/MS spectra to the detected compound). The input files pass through a  
43 data-processing workflow consisting of nodes, whose parameters function sequentially as the  
44 following: (i) align retention times of all replicate chromatograms with respect to one file. (ii)  
45 Detect compounds with a minimum peak intensity of  $10^4$ , chromatographic signal-to-noise ratio  $>$   
46 3, and only the most intense isotope. (iii) Group the detected compounds if their retention time  
47 (RT) is within  $\pm 0.1$  min and mass within  $\pm 5$  ppm. Compounds with same  $m/z$  but RT difference  
48 greater than  $\pm 0.1$  min will be considered an isomer. No preference is given to one particular ion  
49 adduct while grouping, but in our analysis, 98.8% of filtered compounds were detected as [M-H]<sup>-</sup>  
50 ions. (iv) Background compounds that are detected in the blank in accordance with the above  
51 tolerances are marked and can be removed later by filtering. (v) The detected compounds undergo  
52 molecular formula assignment with the help of an in-house built library and prediction based on  
53 limits specified as 30 C atoms, 70 H atoms, and 20 O atoms with mass tolerance set to  $\pm 5$  ppm,  
54 and minimum and maximum H/C ratio of 1 and 2, respectively. (vi) Compare the MS<sup>2</sup> data against  
55 the in-house built library for compound identification and confirmation of their presence in the  
56 filter sample. (vii) Manually filter data by identifying compounds detected in at least four  
57 chromatographic runs and tagging all the compounds in the C<sub>5-20</sub> range. The in-house built MS<sup>2</sup>  
58 library was made using mzVault software (version 2.3, Thermo Fisher Scientific). Biogenic OOMs  
59 were manually listed based on their unique MS<sup>2</sup> spectra.

### 60 Volatility basis set (VBS)

61 The volatility basis set (VBS) is a simplified parametrization to estimate the saturation vapor  
62 concentration of organics and grouping them into volatility bins based on their elemental chemical  
63 composition [Donahue *et al.*, 2011]. The saturation vapor concentrations of the organic compounds  
64 are projected in the two-dimensional  $\log_{10} C_i^0 - O:C$  space. The VBS was modified by [Mohr *et*  
65 *al.*, 2019] to accommodate the ambient NO<sub>x</sub> conditions and the most common autoxidation  
66 reaction for OOMs formation that leads to hydroperoxide, peroxide, or peroxy-acid functional  
67 groups. The modified VBS was used to calculate the saturation vapor concentration:

68 
$$\log_{10}C_i^0 = (n_c^0 - n_c)b_c - n_o b_o - 2 \frac{n_c n_o}{n_c + n_o} b_{CO} - n_N b_N$$

69 Where  $n_c^0 = 25$ ,  $b_c = 0.475$ ,  $b_o = 0.2$ ,  $b_{CO} = 0.9$  and  $b_N = 2.5$ ;  $n_c$ ,  $n_o$  and  $n_N$  are the number of  
 70 carbon, oxygen, and nitrogen in the OOMs, respectively. Because VBS considers only the  
 71 elemental compositions, it cannot differentiate the volatilities of isomeric compounds, leading to  
 72 uncertainties in volatilities for OOMs.

### 73 **GECKO-A modeling and species selection**

74 GECKO-A (Generator of Explicit Chemistry and Kinetics of Organics in the Atmosphere)  
 75 ([Aumont *et al.*, 2005; Camredon *et al.*, 2007; Valorso *et al.*, 2011]; updated per [Jenkin *et al.*,  
 76 2020; Jenkin *et al.*, 2019; Jenkin *et al.*, 2018]) is an automated tool that generates explicit  
 77 atmospheric oxidation schemes for organic compounds based on experimental data and structure–  
 78 activity relationships (SARs) in the absence of experimental data. The GECKO-A generated  
 79 mechanisms have been used in many studies to investigate species formed during oxidation under  
 80 atmospheric conditions (e.g., [Afreh *et al.*, 2021; Galeazzo *et al.*, 2024; He *et al.*, 2024; Peng *et*  
 81 *al.*, 2021]).

82 In this study, a five-generation  $\alpha$ -pinene oxidation mechanism was generated using GECKO-A and  
 83 was employed to verify proposed molecular structures of organic compounds (identified in Section  
 84 3.2) that can contribute to particle formation and growth through accretion reactions. The  
 85 generated scheme includes 870,343 reactions and 152,162 species. Since GECKO-A currently  
 86 does not include particle-phase reactions, the search and selection processes focused on C10 and  
 87 C9 reactant isomers identified from flow tube experiments. Exact and similar matches are listed in  
 88 Table S3, where similar matches are GECKO-A species that differ from the exact match only in  
 89 their oxygen-containing functional groups.

90 A GECKO-A box model simulation under dark conditions was also conducted to simulate  
 91 concentrations of the reactant species that are expected to contribute to dimer formation, under the  
 92 flow tube conditions described in Section 2 (i.e., temperature at 298 K, RH at 10 %, initial  
 93 concentration of ozone at 1.2 ppm, and  $\alpha$ -pinene at 240 ppb). The gas-particle partitioning is  
 94 treated dynamically where the method of Nannoolal *et al.* [Nannoolal *et al.*, 2008] is used to  
 95 calculate saturation vapor pressure. Figure S7 presents the concentration of matched species,  
 96 where TD9000 (C9H14O2) and TT000D (C10H18O2) are the dominant compounds, which also  
 97 indicates the great potential of the dimerization path shown in Figures 4d and 4e.



99 **Table S1:** Top 50% OOMs detected using FIGAERO HrTOF-CIMS in gas- and particle-phase,  
 100 and UPLC/(-)ESI-Orbitrap MS in the particle phase.

101

| Compounds | HrTOF-CIMS (Gas) | FIGAERO-CIMS (Particle) | LC-Orbitrap (Particle) |
|-----------|------------------|-------------------------|------------------------|
| C5H100    |                  |                         |                        |
| C5H1003   |                  |                         |                        |
| C5H1004   |                  |                         |                        |
| C5H1005   |                  |                         |                        |
| C5H1006   |                  |                         |                        |
| C5H1007   |                  |                         |                        |
| C5H1008   |                  |                         |                        |
| C5H403    |                  |                         |                        |
| C5H405    |                  |                         |                        |
| C5H602    |                  |                         |                        |
| C5H603    |                  |                         |                        |
| C5H604    |                  |                         |                        |
| C5H605    |                  |                         |                        |
| C5H606    |                  |                         |                        |
| C5H607    |                  |                         |                        |
| C5H705    |                  |                         |                        |
| C5H707    |                  |                         |                        |
| C5H802    |                  |                         |                        |
| C5H803    |                  |                         |                        |
| C5H804    |                  |                         |                        |
| C5H805    |                  |                         |                        |
| C5H806    |                  |                         |                        |
| C5H807    |                  |                         |                        |
| C5H808    |                  |                         |                        |
| C6H100    |                  |                         |                        |
| C6H1002   |                  |                         |                        |
| C6H1003   |                  |                         |                        |
| C6H1004   |                  |                         |                        |
| C6H1005   |                  |                         |                        |
| C6H1006   |                  |                         |                        |
| C6H1007   |                  |                         |                        |
| C6H1008   |                  |                         |                        |
| C6H1104   |                  |                         |                        |
| C6H1204   |                  |                         |                        |
| C6H1205   |                  |                         |                        |
| C6H1206   |                  |                         |                        |
| C6H1208   |                  |                         |                        |
| C6H1408   |                  |                         |                        |
| C6H1506   |                  |                         |                        |
| C6H604    |                  |                         |                        |
| C6H606    |                  |                         |                        |
| C6H702    |                  |                         |                        |
| C6H802    |                  |                         |                        |
| C6H803    |                  |                         |                        |
| C6H804    |                  |                         |                        |
| C6H805    |                  |                         |                        |
| C6H806    |                  |                         |                        |
| C6H807    |                  |                         |                        |
| C7H1003   |                  |                         |                        |
| C7H1004   |                  |                         |                        |
| C7H1005   |                  |                         |                        |
| C7H1006   |                  |                         |                        |
| C7H1007   |                  |                         |                        |
| C7H1008   |                  |                         |                        |
| C7H1009   |                  |                         |                        |
| C7H1105   |                  |                         |                        |
| C7H1106   |                  |                         |                        |
| C7H1202   |                  |                         |                        |
| C7H1203   |                  |                         |                        |
| C7H1204   |                  |                         |                        |
| C7H1205   |                  |                         |                        |
| C7H1206   |                  |                         |                        |
| C7H1207   |                  |                         |                        |
| C7H1208   |                  |                         |                        |
| C7H1209   |                  |                         |                        |
| C7H1305   |                  |                         |                        |
| C7H1308   |                  |                         |                        |
| C7H1309   |                  |                         |                        |

|          |     |       |      |
|----------|-----|-------|------|
| C7H1402  |     |       | Blue |
| C7H1403  |     |       | Blue |
| C7H1404  | Red | Green | Blue |
| C7H1405  | Red | Green |      |
| C7H1406  | Red | Green |      |
| C7H1407  | Red | Green |      |
| C7H1408  | Red | Green |      |
| C7H1607  | Red | Green |      |
| C7H503   | Red |       |      |
| C7H802   | Red |       |      |
| C7H803   | Red |       | Blue |
| C7H804   | Red | Green |      |
| C8H1003  | Red | Green | Blue |
| C8H1004  | Red | Green |      |
| C8H1005  | Red |       | Blue |
| C8H1106  | Red |       |      |
| C8H12010 | Red |       |      |
| C8H1202  | Red |       |      |
| C8H1203  | Red |       | Blue |
| C8H1204  | Red | Green | Blue |
| C8H1205  | Red | Green | Blue |
| C8H1206  | Red | Green | Blue |
| C8H1207  | Red | Green |      |
| C8H1208  | Red | Green |      |
| C8H1209  | Red |       |      |
| C8H1307  | Red |       |      |
| C8H1402  | Red |       | Blue |
| C8H1403  | Red |       | Blue |
| C8H1404  |     | Green | Blue |
| C8H1405  | Red | Green | Blue |
| C8H1406  | Red | Green | Blue |
| C8H1407  | Red | Green |      |
| C8H1408  | Red |       |      |
| C8H1409  | Red | Green | Blue |
| C8H16010 | Red | Green |      |
| C8H1603  |     |       | Blue |
| C8H1608  | Red |       |      |
| C8H1609  | Red |       |      |
| C8H18010 | Red | Green |      |

|          |     |       |      |
|----------|-----|-------|------|
| C8H1809  | Red | Green |      |
| C8H802   |     |       | Blue |
| C8H803   | Red | Green |      |
| C8H804   | Red | Green |      |
| C8H809   | Red |       |      |
| C9H10010 | Red | Green |      |
| C9H10011 | Red | Green | Blue |
| C9H10013 |     |       | Blue |
| C9H1003  | Red |       |      |
| C9H1005  | Red |       |      |
| C9H1007  | Red |       |      |
| C9H1008  | Red |       |      |
| C9H1009  |     | Green |      |
| C9H1103  | Red |       |      |
| C9H1106  | Red |       |      |
| C9H1108  | Red |       |      |
| C9H1109  | Red |       |      |
| C9H1203  | Red | Green |      |
| C9H1204  | Red |       | Blue |
| C9H1205  | Red |       |      |
| C9H1206  | Red | Green | Blue |
| C9H1208  | Red | Green |      |
| C9H1209  | Red |       |      |
| C9H1305  | Red |       |      |
| C9H1306  | Red |       |      |
| C9H1307  | Red |       |      |
| C9H140   |     |       | Blue |
| C9H1402  | Red |       | Blue |
| C9H1403  | Red | Green | Blue |
| C9H1404  | Red | Green | Blue |
| C9H1405  | Red | Green | Blue |
| C9H1406  | Red | Green | Blue |
| C9H1407  | Red | Green |      |
| C9H1408  | Red |       |      |
| C9H1409  | Red |       |      |
| C9H1504  | Red | Green |      |
| C9H1506  | Red |       |      |
| C9H1507  | Red |       |      |
| C9H1508  | Red |       |      |

|           |     |       |      |
|-----------|-----|-------|------|
| C9H160    |     |       | Blue |
| C9H16011  | Red |       |      |
| C9H1602   |     |       | Blue |
| C9H1603   |     |       | Blue |
| C9H1605   | Red | Green | Blue |
| C9H1606   | Red | Green | Blue |
| C9H1607   | Red | Green |      |
| C9H1608   | Red | Green |      |
| C9H18010  | Red |       |      |
| C9H18011  | Red | Green |      |
| C9H1802   | Red |       |      |
| C9H1803   |     |       | Blue |
| C9H20010  | Red | Green |      |
| C9H2005   | Red |       |      |
| C9H2008   | Red | Green |      |
| C9H605    | Red |       |      |
| C10H1004  | Red | Green |      |
| C10H1005  |     |       | Blue |
| C10H1105  | Red |       |      |
| C10H12011 | Red | Green |      |
| C10H1204  | Red | Green |      |
| C10H1205  | Red |       |      |
| C10H1206  | Red | Green |      |
| C10H1207  | Red | Green |      |
| C10H1208  | Red |       |      |
| C10H1305  | Red | Green |      |
| C10H1306  | Red |       |      |
| C10H1307  | Red |       |      |
| C10H140   |     | Green |      |
| C10H14010 |     | Green |      |
| C10H14012 | Red | Green |      |
| C10H1402  | Red | Green |      |
| C10H1403  | Red | Green | Blue |
| C10H1404  | Red | Green | Blue |
| C10H1405  | Red | Green | Blue |
| C10H1406  | Red | Green | Blue |
| C10H1407  | Red | Green |      |
| C10H1408  | Red | Green |      |
| C10H1409  | Red | Green |      |

|           |     |       |      |
|-----------|-----|-------|------|
| C10H1504  | Red |       |      |
| C10H1506  | Red |       |      |
| C10H1507  | Red |       |      |
| C10H1508  | Red |       |      |
| C10H16010 | Red |       |      |
| C10H1602  | Red |       |      |
| C10H1603  | Red | Green | Blue |
| C10H1604  | Red | Green | Blue |
| C10H1605  | Red | Green | Blue |
| C10H1606  | Red | Green | Blue |
| C10H1607  | Red | Green | Blue |
| C10H1608  | Red | Green |      |
| C10H1609  | Red | Green |      |
| C10H1706  | Red |       |      |
| C10H1707  | Red |       |      |
| C10H1708  | Red |       |      |
| C10H18010 | Red | Green | Blue |
| C10H1804  |     |       | Blue |
| C10H1805  | Red | Green |      |
| C10H1806  | Red | Green | Blue |
| C10H1807  | Red |       |      |
| C10H1808  | Red | Green |      |
| C10H1809  | Red |       |      |
| C10H20010 | Red | Green |      |
| C10H2003  |     |       | Blue |
| C10H2006  | Red | Green |      |
| C10H2008  | Red | Green |      |
| C10H2009  | Red | Green |      |
| C10H2204  | Red | Green |      |
| C10H2206  | Red |       |      |
| C10H2208  | Red | Green |      |
| C11H1002  | Red |       |      |
| C11H12010 | Red |       |      |
| C11H1206  | Red | Green |      |
| C11H1207  | Red | Green |      |
| C11H14010 | Red | Green |      |
| C11H1402  | Red | Green |      |
| C11H1403  | Red | Green | Blue |
| C11H1406  | Red | Green |      |

|           |     |       |      |
|-----------|-----|-------|------|
| C11H1407  | Red | Green |      |
| C11H1409  | Red |       |      |
| C11H160   | Red |       |      |
| C11H1606  | Red | Green | Blue |
| C11H1607  | Red | Green |      |
| C11H1608  | Red | Green |      |
| C11H1609  | Red | Green |      |
| C11H1704  |     | Green |      |
| C11H1706  | Red |       |      |
| C11H1707  | Red |       |      |
| C11H1708  | Red |       |      |
| C11H18010 | Red |       |      |
| C11H1804  |     |       | Blue |
| C11H1805  | Red | Green | Blue |
| C11H1806  |     | Green |      |
| C11H1807  | Red | Green | Blue |
| C11H1903  | Red |       |      |
| C11H1907  | Red |       |      |
| C11H1908  | Red |       |      |
| C11H20010 | Red |       |      |
| C11H20011 | Red | Green |      |
| C11H2004  |     |       | Blue |
| C11H24010 | Red |       |      |
| C11H2403  | Red | Green |      |
| C11H2406  | Red | Green |      |
| C11H2407  |     | Green |      |
| C12H1006  | Red |       |      |
| C12H1008  | Red | Green |      |
| C12H1205  |     | Green |      |
| C12H1208  | Red |       |      |
| C12H1404  |     |       | Blue |
| C12H1407  | Red | Green |      |
| C12H16010 | Red |       |      |
| C12H16011 | Red | Green |      |
| C12H1602  | Red |       |      |
| C12H1603  |     |       | Blue |
| C12H1606  | Red |       |      |
| C12H1607  | Red | Green |      |
| C12H1608  | Red |       |      |

|           |     |       |      |
|-----------|-----|-------|------|
| C12H1707  | Red |       |      |
| C12H1805  |     |       | Blue |
| C12H1806  | Red |       | Blue |
| C12H1807  | Red | Green |      |
| C12H1808  | Red | Green |      |
| C12H1809  | Red |       |      |
| C12H1907  | Red |       |      |
| C12H2002  |     |       | Blue |
| C12H2004  |     |       | Blue |
| C12H2005  | Red | Green | Blue |
| C12H2006  |     |       | Blue |
| C12H2007  | Red |       |      |
| C12H2008  | Red | Green |      |
| C12H22011 |     |       | Blue |
| C12H2203  |     |       | Blue |
| C12H2204  |     |       | Blue |
| C12H2405  | Red | Green |      |
| C12H2406  | Red | Green |      |
| C12H2606  | Red | Green |      |
| C12H8012  | Red | Green |      |
| C13H1405  | Red | Green |      |
| C13H1606  | Red |       |      |
| C13H1609  | Red | Green |      |
| C13H1803  | Red |       |      |
| C13H1809  | Red | Green |      |
| C13H2002  |     |       | Blue |
| C13H2004  |     |       | Blue |
| C13H2005  | Red |       |      |
| C13H2006  | Red | Green | Blue |
| C13H2007  | Red | Green | Blue |
| C13H2008  | Red |       |      |
| C13H2009  |     | Green |      |
| C13H2202  |     |       | Blue |
| C13H2206  |     | Green |      |
| C13H2207  | Red | Green |      |
| C13H2208  | Red | Green |      |
| C13H24014 | Red | Green |      |
| C13H2405  | Red | Green |      |
| C13H26016 |     |       | Blue |



|           |     |       |      |
|-----------|-----|-------|------|
| C13H28O8  |     |       |      |
| C14H16O6  | Red |       |      |
| C14H18O4  | Red | Green |      |
| C14H20O2  | Red | Green |      |
| C14H20O6  |     |       | Blue |
| C14H20O7  | Red | Green | Blue |
| C14H20O8  |     | Green | Blue |
| C14H22O12 | Red | Green |      |
| C14H22O2  |     |       | Blue |
| C14H22O4  |     |       | Blue |
| C14H22O5  | Red |       |      |
| C14H22O6  | Red | Green | Blue |
| C14H22O8  | Red | Green |      |
| C14H24O10 | Red | Green |      |
| C14H24O11 | Red |       |      |
| C14H24O6  | Red | Green |      |
| C14H24O7  | Red | Green |      |
| C14H26O13 | Red | Green |      |
| C14H26O6  |     | Green |      |
| C14H26O8  |     | Green |      |
| C14H28O16 |     |       | Blue |
| C14H28O6  | Red | Green |      |
| C14H28O9  | Red |       |      |
| C14H30O5  | Red | Green |      |
| C15H17O5  | Red |       |      |
| C15H18O2  |     | Green |      |
| C15H18O3  | Red | Green |      |
| C15H18O5  | Red | Green |      |
| C15H20O10 | Red | Green |      |
| C15H20O4  |     |       | Blue |
| C15H20O5  |     | Green |      |
| C15H20O9  | Red | Green |      |
| C15H22O10 |     | Green |      |
| C15H22O11 | Red | Green |      |
| C15H22O6  | Red | Green | Blue |
| C15H22O8  | Red | Green | Blue |
| C15H22O9  | Red | Green |      |
| C15H24O10 | Red | Green |      |
| C15H24O11 | Red |       |      |

|           |     |       |      |
|-----------|-----|-------|------|
| C15H24O5  | Red | Green | Blue |
| C15H24O6  | Red | Green | Blue |
| C15H24O7  |     | Green | Blue |
| C15H24O8  | Red | Green | Blue |
| C15H24O9  |     | Green |      |
| C15H25O9  | Red |       |      |
| C15H26O10 | Red | Green |      |
| C15H26O13 | Red | Green |      |
| C15H26O5  |     |       | Blue |
| C15H26O6  | Red | Green | Blue |
| C15H26O7  |     |       | Blue |
| C15H26O8  |     |       | Blue |
| C15H27O5  |     | Green |      |
| C15H28O12 | Red | Green |      |
| C15H28O13 | Red | Green |      |
| C15H30O4  | Red | Green |      |
| C15H30O9  | Red |       |      |
| C15H31O12 | Red |       |      |
| C15H31O9  | Red |       |      |
| C15H32O12 |     | Green |      |
| C15H32O5  | Red |       |      |
| C15H32O9  | Red |       |      |
| C16H16O6  | Red | Green |      |
| C16H18O2  | Red | Green |      |
| C16H18O3  | Red | Green |      |
| C16H18O7  |     | Green |      |
| C16H20O11 | Red | Green |      |
| C16H20O5  | Red | Green |      |
| C16H20O6  |     | Green |      |
| C16H20O7  | Red | Green |      |
| C16H20O8  | Red | Green |      |
| C16H20O9  | Red | Green |      |
| C16H22O10 | Red | Green |      |
| C16H22O11 | Red | Green |      |
| C16H22O12 |     | Green |      |
| C16H22O4  |     | Green |      |
| C16H22O5  | Red | Green |      |
| C16H22O6  |     | Green |      |
| C16H22O7  | Red | Green | Blue |

|           |     |       |      |
|-----------|-----|-------|------|
| C16H22O8  | Red | Green |      |
| C16H22O9  | Red | Green |      |
| C16H24O11 | Red | Green |      |
| C16H24O5  |     | Green |      |
| C16H24O6  | Red | Green | Blue |
| C16H24O7  | Red | Green | Blue |
| C16H24O8  | Red | Green | Blue |
| C16H26O10 |     | Green |      |
| C16H26O4  |     |       | Blue |
| C16H26O5  |     | Green | Blue |
| C16H26O6  |     | Green | Blue |
| C16H26O7  | Red | Green | Blue |
| C16H26O8  | Red | Green | Blue |
| C16H26O9  |     | Green | Blue |
| C16H28O7  |     | Green |      |
| C16H30O3  | Red | Green |      |
| C16H31O12 | Red |       |      |
| C16H32O8  | Red | Green |      |
| C16H34O4  | Red | Green |      |
| C16H34O5  | Red | Green |      |
| C17H14O12 | Red | Green |      |
| C17H14O6  | Red | Green |      |
| C17H14O7  | Red |       |      |
| C17H18O2  | Red | Green |      |
| C17H18O5  | Red | Green |      |
| C17H18O7  | Red | Green |      |
| C17H20O7  |     | Green |      |
| C17H20O9  |     | Green |      |
| C17H22O10 | Red | Green |      |
| C17H22O7  | Red | Green |      |
| C17H22O8  | Red |       |      |
| C17H22O9  | Red | Green |      |
| C17H24O12 |     | Green |      |
| C17H24O3  | Red | Green |      |
| C17H24O6  | Red | Green | Blue |
| C17H24O7  | Red | Green |      |
| C17H24O8  | Red | Green | Blue |
| C17H24O9  | Red | Green |      |
| C17H25O5  |     | Green |      |

|           |     |       |      |
|-----------|-----|-------|------|
| C17H25O9  | Red |       |      |
| C17H26O4  |     |       | Blue |
| C17H26O5  | Red | Green | Blue |
| C17H26O6  | Red | Green | Blue |
| C17H26O7  | Red | Green | Blue |
| C17H26O8  | Red | Green | Blue |
| C17H26O9  | Red | Green | Blue |
| C17H27O2  | Red |       |      |
| C17H28O10 |     |       | Blue |
| C17H28O11 |     | Green |      |
| C17H28O12 |     | Green |      |
| C17H28O3  | Red | Green |      |
| C17H28O4  |     | Green |      |
| C17H28O5  |     | Green | Blue |
| C17H28O6  | Red | Green |      |
| C17H28O7  | Red | Green | Blue |
| C17H28O8  |     | Green | Blue |
| C17H28O9  |     | Green | Blue |
| C17H30O4  | Red | Green |      |
| C17H30O5  | Red | Green |      |
| C17H32O4  | Red | Green |      |
| C17H32O5  | Red | Green |      |
| C17H32O6  | Red | Green |      |
| C17H36O4  | Red |       |      |
| C17H36O5  | Red |       |      |
| C18H14O8  |     |       | Blue |
| C18H18O5  | Red | Green |      |
| C18H20O6  | Red | Green |      |
| C18H22O13 | Red | Green |      |
| C18H22O7  | Red | Green |      |
| C18H24O10 | Red | Green |      |
| C18H24O14 |     | Green |      |
| C18H24O2  | Red | Green |      |
| C18H24O5  |     | Green |      |
| C18H24O6  | Red | Green |      |
| C18H24O8  | Red | Green |      |
| C18H24O9  | Red | Green |      |
| C18H26O5  | Red | Green | Blue |
| C18H26O6  | Red | Green | Blue |

|           |       |       |       |
|-----------|-------|-------|-------|
| C18H2607  | Red   | Green | Blue  |
| C18H2608  | Red   | Green | Blue  |
| C18H2609  | Red   | Green | Blue  |
| C18H28010 | White | White | Blue  |
| C18H28011 | White | Green | White |
| C18H2804  | Red   | Green | Blue  |
| C18H2805  | Red   | Green | Blue  |
| C18H2806  | Red   | Green | Blue  |
| C18H2807  | Red   | Green | Blue  |
| C18H2808  | Red   | Green | Blue  |
| C18H2809  | Red   | Green | Blue  |
| C18H30010 | White | White | Blue  |
| C18H30015 | White | Green | White |
| C18H3003  | Red   | Green | White |
| C18H3004  | White | Green | Blue  |
| C18H3005  | Red   | Green | Blue  |
| C18H3006  | Red   | Green | Blue  |
| C18H3007  | Red   | Green | Blue  |
| C18H3008  | White | Green | Blue  |
| C18H3009  | White | Green | Blue  |
| C18H32012 | White | Green | White |
| C18H32018 | Red   | Green | White |
| C18H3206  | Red   | Green | White |
| C18H3207  | Red   | Green | White |
| C18H3208  | White | Green | White |
| C18H3209  | White | Green | White |
| C18H34012 | White | Green | White |
| C18H3405  | Red   | Green | White |
| C18H3406  | Red   | Green | White |
| C18H3407  | White | Green | White |
| C18H3408  | White | Green | White |
| C18H36012 | White | Green | White |
| C18H3602  | Red   | Green | White |
| C18H3609  | Red   | Green | White |
| C19H1709  | White | Green | White |
| C19H20017 | White | Green | White |
| C19H2204  | Red   | Green | White |
| C19H2206  | White | Green | White |
| C19H24010 | White | Green | White |

|           |       |       |       |
|-----------|-------|-------|-------|
| C19H2604  | Red   | Green | White |
| C19H2605  | Red   | Green | White |
| C19H2606  | Red   | Green | White |
| C19H2607  | Red   | White | White |
| C19H2608  | Red   | Green | White |
| C19H2609  | Red   | Green | White |
| C19H28011 | Red   | Green | White |
| C19H2804  | White | Green | White |
| C19H2805  | Red   | Green | White |
| C19H2806  | Red   | Green | Blue  |
| C19H2807  | Red   | Green | Blue  |
| C19H2808  | Red   | Green | Blue  |
| C19H2809  | Red   | Green | Blue  |
| C19H30010 | Red   | Green | Blue  |
| C19H30011 | Red   | Green | White |
| C19H30012 | White | Green | White |
| C19H30013 | White | Green | White |
| C19H30015 | White | Green | White |
| C19H3004  | Red   | Green | White |
| C19H3005  | Red   | Green | Blue  |
| C19H3006  | Red   | Green | Blue  |
| C19H3007  | Red   | Green | Blue  |
| C19H3008  | Red   | Green | Blue  |
| C19H3009  | Red   | Green | Blue  |
| C19H32010 | Red   | Green | White |
| C19H32011 | White | Green | White |
| C19H32012 | White | Green | White |
| C19H32013 | White | Green | White |
| C19H32014 | White | Green | White |
| C19H32015 | White | Green | White |
| C19H3206  | Red   | Green | White |
| C19H3207  | White | White | Blue  |
| C19H3208  | White | Green | White |
| C19H3209  | Red   | White | White |
| C19H3407  | Red   | Green | White |
| C19H3409  | White | Green | White |
| C19H36012 | White | Green | White |
| C19H38010 | Red   | Green | White |
| C19H4206  | Red   | Green | White |

|           |     |       |  |      |
|-----------|-----|-------|--|------|
| C20H18O12 |     |       |  | Blue |
| C20H18O9  |     |       |  | Blue |
| C20H22O10 | Red |       |  |      |
| C20H24O6  | Red | Green |  |      |
| C20H24O7  |     | Green |  |      |
| C20H26O10 |     | Green |  |      |
| C20H26O5  |     | Green |  |      |
| C20H26O6  |     | Green |  |      |
| C20H28O10 | Red | Green |  |      |
| C20H28O11 |     | Green |  |      |
| C20H28O12 | Red | Green |  |      |
| C20H28O5  | Red | Green |  |      |
| C20H28O6  | Red | Green |  |      |
| C20H28O7  | Red | Green |  | 102  |
| C20H28O8  |     | Green |  |      |
| C20H30O10 | Red | Green |  |      |
| C20H30O11 |     | Green |  |      |
| C20H30O12 |     | Green |  |      |
| C20H30O13 | Red |       |  |      |
| C20H30O14 |     | Green |  |      |
| C20H30O15 |     | Green |  |      |
| C20H30O16 |     | Green |  |      |
| C20H30O5  | Red | Green |  |      |
| C20H30O6  | Red | Green |  | Blue |
| C20H30O7  | Red | Green |  | Blue |
| C20H30O8  | Red | Green |  |      |
| C20H30O9  | Red | Green |  |      |
| C20H32O10 | Red | Green |  |      |
| C20H32O11 |     | Green |  |      |
| C20H32O13 |     | Green |  |      |
| C20H32O14 |     | Green |  |      |
| C20H32O15 |     | Green |  |      |
| C20H32O16 |     | Green |  |      |
| C20H32O4  | Red | Green |  |      |
| C20H32O6  | Red | Green |  | Blue |
| C20H32O7  | Red | Green |  | Blue |
| C20H32O8  | Red | Green |  | Blue |
| C20H32O9  | Red | Green |  |      |
| C20H34O13 |     | Green |  |      |

|           |     |       |  |  |
|-----------|-----|-------|--|--|
| C20H34O3  |     | Green |  |  |
| C20H34O5  | Red | Green |  |  |
| C20H34O6  | Red | Green |  |  |
| C20H34O7  | Red | Green |  |  |
| C20H34O8  | Red | Green |  |  |
| C20H38O11 |     | Green |  |  |
| C20H38O3  |     | Green |  |  |
| C20H38O5  | Red | Green |  |  |
| C20H38O9  |     | Green |  |  |
| C20H40O10 |     | Green |  |  |
| C20H40O9  |     | Green |  |  |
| C20H42O10 |     | Green |  |  |
| C20H42O11 |     | Green |  |  |

**Table S2:** Isomer resolved OOMs identified by UPLC/(-)ESI-Orbitrap MS with assigned molecular formula labeled as  $C_xH_yO_z-n$  ( $x$  number of carbons,  $y$  number of hydrogens,  $z$  number of oxygens and  $n$  isomeric compound assignment), the  $m/z$ , retention time (RT), relative abundance with respect to all the compounds listed in the table and major MS/MS fragments of each OOMs identified in the negative ion mode.

| Compounds                                        | $m/z$    | RT (min) | Signal fraction (%) | MS/MS fragments – ionic formulas $[C_xH_yO_z]^-$ given in parentheses                                                                                                                                                                                  |
|--------------------------------------------------|----------|----------|---------------------|--------------------------------------------------------------------------------------------------------------------------------------------------------------------------------------------------------------------------------------------------------|
| C <sub>5</sub> H <sub>8</sub> O <sub>5</sub> -1  | 147.0298 | 1.35     | 0.14                | 85.0294 (C <sub>4</sub> H <sub>5</sub> O <sub>2</sub> ), 73.0294 (C <sub>3</sub> H <sub>5</sub> O <sub>2</sub> ), 59.0138 (C <sub>2</sub> H <sub>3</sub> O <sub>2</sub> ), 43.0190 (C <sub>2</sub> H <sub>3</sub> O)                                   |
| C <sub>5</sub> H <sub>8</sub> O <sub>5</sub> -2  |          | 1.62     | 0.19                |                                                                                                                                                                                                                                                        |
| C <sub>7</sub> H <sub>10</sub> O <sub>5</sub> -1 | 173.0454 | 2.37     | 0.33                |                                                                                                                                                                                                                                                        |
| C <sub>7</sub> H <sub>10</sub> O <sub>5</sub> -2 |          | 2.22     | 0.25                |                                                                                                                                                                                                                                                        |
| C <sub>7</sub> H <sub>10</sub> O <sub>6</sub> -1 | 189.0404 | 1.34     | 0.04                |                                                                                                                                                                                                                                                        |
| C <sub>7</sub> H <sub>10</sub> O <sub>6</sub> -2 |          | 1.58     | 0.08                |                                                                                                                                                                                                                                                        |
| C <sub>7</sub> H <sub>12</sub> O <sub>4</sub>    | 159.0661 | 9.24     | 0.05                |                                                                                                                                                                                                                                                        |
| C <sub>7</sub> H <sub>12</sub> O <sub>5</sub> -1 | 175.0610 | 2.75     | 0.18                |                                                                                                                                                                                                                                                        |
| C <sub>7</sub> H <sub>12</sub> O <sub>5</sub> -2 |          | 4.9      | 0.06                |                                                                                                                                                                                                                                                        |
| C <sub>7</sub> H <sub>12</sub> O <sub>5</sub> -3 |          | 4.73     | 0.04                |                                                                                                                                                                                                                                                        |
| C <sub>7</sub> H <sub>12</sub> O <sub>5</sub> -4 |          | 1.27     | 0.01                |                                                                                                                                                                                                                                                        |
| C <sub>8</sub> H <sub>12</sub> O <sub>4</sub> -1 | 171.0663 | 5.59     | 14.00               | 171.0661 (C <sub>8</sub> H <sub>11</sub> O <sub>4</sub> )                                                                                                                                                                                              |
| C <sub>8</sub> H <sub>12</sub> O <sub>4</sub> -2 |          | 6.99     | 0.10                |                                                                                                                                                                                                                                                        |
| C <sub>8</sub> H <sub>12</sub> O <sub>4</sub> -3 |          | 8.05     | 1.96                |                                                                                                                                                                                                                                                        |
| C <sub>8</sub> H <sub>12</sub> O <sub>5</sub> -1 | 187.0611 | 5.56     | 0.12                | 187.0616 (C <sub>8</sub> H <sub>11</sub> O <sub>5</sub> ), 143.0715 (C <sub>7</sub> H <sub>11</sub> O <sub>3</sub> ), 125.0976 (C <sub>8</sub> H <sub>13</sub> O), 87.0451 (C <sub>4</sub> H <sub>7</sub> O <sub>2</sub> )                             |
| C <sub>8</sub> H <sub>12</sub> O <sub>5</sub> -2 |          | 4.67     | 0.08                | 187.0616 (C <sub>8</sub> H <sub>11</sub> O <sub>5</sub> ), 169.0507 (C <sub>8</sub> H <sub>9</sub> O <sub>4</sub> ), 125.0976 (C <sub>8</sub> H <sub>13</sub> O), 97.0661 (C <sub>6</sub> H <sub>9</sub> O), 57.0347 (C <sub>3</sub> H <sub>5</sub> O) |
| C <sub>8</sub> H <sub>12</sub> O <sub>5</sub> -3 |          | 8.34     | 0.05                |                                                                                                                                                                                                                                                        |

|                                                  |          |       |      |                                                                                                                                                                                                                                                                                                                                            |
|--------------------------------------------------|----------|-------|------|--------------------------------------------------------------------------------------------------------------------------------------------------------------------------------------------------------------------------------------------------------------------------------------------------------------------------------------------|
| C <sub>8</sub> H <sub>12</sub> O <sub>5</sub> -4 |          | 2.33  | 0.24 |                                                                                                                                                                                                                                                                                                                                            |
| C <sub>8</sub> H <sub>12</sub> O <sub>5</sub> -5 |          | 5.77  | 0.06 |                                                                                                                                                                                                                                                                                                                                            |
| C <sub>8</sub> H <sub>12</sub> O <sub>5</sub> -6 |          | 8.78  | 0.03 |                                                                                                                                                                                                                                                                                                                                            |
| C <sub>8</sub> H <sub>12</sub> O <sub>5</sub> -7 |          | 2.55  | 0.12 |                                                                                                                                                                                                                                                                                                                                            |
| C <sub>8</sub> H <sub>12</sub> O <sub>6</sub> -1 | 203.0560 | 5.86  | 0.25 | 185.0455 (C <sub>8</sub> H <sub>9</sub> O <sub>5</sub> ), 115.0764 (C <sub>6</sub> H <sub>11</sub> O <sub>2</sub> ), 97.06660 (C <sub>6</sub> H <sub>9</sub> O), 87.0452 (C <sub>4</sub> H <sub>7</sub> O <sub>2</sub> ), 71.0138 (C <sub>3</sub> H <sub>3</sub> O <sub>2</sub> ), 59.0138 (C <sub>2</sub> H <sub>3</sub> O <sub>2</sub> ) |
| C <sub>8</sub> H <sub>12</sub> O <sub>6</sub> -2 |          | 5.75  | 0.12 | 185.0455 (C <sub>8</sub> H <sub>9</sub> O <sub>5</sub> ), 141.0559 (C <sub>7</sub> H <sub>9</sub> O <sub>3</sub> ), 97.06660 (C <sub>6</sub> H <sub>9</sub> O), 71.0138 (C <sub>3</sub> H <sub>3</sub> O <sub>2</sub> )                                                                                                                    |
| C <sub>8</sub> H <sub>14</sub> O <sub>4</sub> -1 | 173.9547 | 5.1   | 0.16 |                                                                                                                                                                                                                                                                                                                                            |
| C <sub>8</sub> H <sub>14</sub> O <sub>4</sub> -2 |          | 10.42 | 0.12 |                                                                                                                                                                                                                                                                                                                                            |
| C <sub>8</sub> H <sub>14</sub> O <sub>5</sub> -1 | 189.0768 | 3.86  | 0.21 | 171.0661 (C <sub>8</sub> H <sub>11</sub> O <sub>4</sub> ), 145.0869 (C <sub>7</sub> H <sub>13</sub> O <sub>3</sub> ), 127.0765 (C <sub>7</sub> H <sub>11</sub> O <sub>2</sub> ), 101.0972 (C <sub>6</sub> H <sub>13</sub> O), 85.0659 (C <sub>5</sub> H <sub>9</sub> O), 57.0347 (C <sub>3</sub> H <sub>5</sub> O)                         |
| C <sub>8</sub> H <sub>14</sub> O <sub>5</sub> -2 |          | 10.71 | 0.46 |                                                                                                                                                                                                                                                                                                                                            |
| C <sub>8</sub> H <sub>14</sub> O <sub>5</sub> -3 |          | 4.1   | 0.36 |                                                                                                                                                                                                                                                                                                                                            |
| C <sub>8</sub> H <sub>14</sub> O <sub>5</sub> -4 |          | 5.77  | 0.19 |                                                                                                                                                                                                                                                                                                                                            |
| C <sub>8</sub> H <sub>14</sub> O <sub>5</sub> -5 |          | 6.23  | 0.09 |                                                                                                                                                                                                                                                                                                                                            |
| C <sub>8</sub> H <sub>14</sub> O <sub>5</sub> -6 |          | 16.72 | 0.02 |                                                                                                                                                                                                                                                                                                                                            |
| C <sub>8</sub> H <sub>14</sub> O <sub>5</sub> -7 |          | 17.65 | 0.02 |                                                                                                                                                                                                                                                                                                                                            |
| C <sub>8</sub> H <sub>14</sub> O <sub>6</sub> -1 | 205.0717 | 5.43  | 0.82 | 87.0090 (C <sub>3</sub> H <sub>3</sub> O <sub>3</sub> ), 85.0295 (C <sub>4</sub> H <sub>5</sub> O <sub>2</sub> ), 59.0138 (C <sub>2</sub> H <sub>3</sub> O <sub>2</sub> ), 57.0344 (C <sub>3</sub> H <sub>5</sub> O)                                                                                                                       |
| C <sub>8</sub> H <sub>14</sub> O <sub>6</sub> -2 |          | 5.31  | 0.32 | 173.0448 (C <sub>7</sub> H <sub>9</sub> O <sub>5</sub> ), 111.0088 (C <sub>5</sub> H <sub>3</sub> O <sub>3</sub> ), 85.0295 (C <sub>4</sub> H <sub>5</sub> O <sub>2</sub> ), 59.0138 (C <sub>2</sub> H <sub>3</sub> O <sub>2</sub> ), 57.0344 (C <sub>3</sub> H <sub>5</sub> O)                                                            |
| C <sub>8</sub> H <sub>14</sub> O <sub>6</sub> -3 |          | 1.58  | 0.04 | 131.0716 (C <sub>6</sub> H <sub>11</sub> O <sub>3</sub> ), 111.0088 (C <sub>5</sub> H <sub>3</sub> O <sub>3</sub> ), 99.0451 (C <sub>5</sub> H <sub>7</sub> O <sub>2</sub> ), 73.0297 (C <sub>3</sub> H <sub>5</sub> O <sub>2</sub> ), 57.0344 (C <sub>3</sub> H <sub>5</sub> O)                                                           |
| C <sub>8</sub> H <sub>14</sub> O <sub>9</sub>    | 253.0692 | 9.3   | 0.06 |                                                                                                                                                                                                                                                                                                                                            |

|                                                  |          |       |       |                                                                                                                                                                                                                                                                                                                                                                                                                                                                                                                                                        |
|--------------------------------------------------|----------|-------|-------|--------------------------------------------------------------------------------------------------------------------------------------------------------------------------------------------------------------------------------------------------------------------------------------------------------------------------------------------------------------------------------------------------------------------------------------------------------------------------------------------------------------------------------------------------------|
| C <sub>9</sub> H <sub>14</sub> O <sub>4</sub> -1 | 185.0815 | 9.28  | 31.46 | 167.0715 (C <sub>9</sub> H <sub>11</sub> O <sub>3</sub> ), 141.0922 (C <sub>8</sub> H <sub>13</sub> O <sub>2</sub> ), 123.0815 (C <sub>8</sub> H <sub>11</sub> O), 99.0451 (C <sub>5</sub> H <sub>7</sub> O <sub>2</sub> ), 71.0138 (C <sub>3</sub> H <sub>3</sub> O <sub>2</sub> ), 57.0347 (C <sub>3</sub> H <sub>5</sub> O)                                                                                                                                                                                                                         |
| C <sub>9</sub> H <sub>14</sub> O <sub>4</sub> -2 |          | 11.06 | 0.11  |                                                                                                                                                                                                                                                                                                                                                                                                                                                                                                                                                        |
| C <sub>9</sub> H <sub>14</sub> O <sub>5</sub> -1 | 201.0768 | 4.91  | 0.33  | 183.0659 (C <sub>9</sub> H <sub>11</sub> O <sub>4</sub> ), 143.0349 (C <sub>6</sub> H <sub>7</sub> O <sub>4</sub> ), 139.0764 (C <sub>8</sub> H <sub>11</sub> O <sub>2</sub> ), 125.0244 (C <sub>6</sub> H <sub>5</sub> O <sub>3</sub> ), 111.0813 (C <sub>7</sub> H <sub>11</sub> O), 99.0450 (C <sub>5</sub> H <sub>7</sub> O <sub>2</sub> ), 81.0345 (C <sub>5</sub> H <sub>5</sub> O), 71.0504 (C <sub>4</sub> H <sub>7</sub> O), 69.0347 (C <sub>4</sub> H <sub>5</sub> O)                                                                        |
| C <sub>9</sub> H <sub>14</sub> O <sub>5</sub> -2 |          | 7.58  | 0.10  | 157.0869 (C <sub>8</sub> H <sub>13</sub> O <sub>3</sub> ), 139.0766 (C <sub>8</sub> H <sub>11</sub> O <sub>2</sub> ), 97.06660 (C <sub>6</sub> H <sub>9</sub> O), 85.0657 (C <sub>5</sub> H <sub>9</sub> O), 71.0138 (C <sub>3</sub> H <sub>3</sub> O <sub>2</sub> ), 57.0347 (C <sub>3</sub> H <sub>5</sub> O)                                                                                                                                                                                                                                        |
| C <sub>9</sub> H <sub>14</sub> O <sub>5</sub> -3 |          | 4.43  | 0.09  | 183.0659 (C <sub>9</sub> H <sub>11</sub> O <sub>4</sub> ), 157.0869 (C <sub>8</sub> H <sub>13</sub> O <sub>3</sub> ), 141.0557 (C <sub>7</sub> H <sub>9</sub> O <sub>3</sub> ), 139.0761 (C <sub>8</sub> H <sub>11</sub> O <sub>2</sub> ), 111.0813 (C <sub>7</sub> H <sub>11</sub> O), 57.0347 (C <sub>3</sub> H <sub>5</sub> O)                                                                                                                                                                                                                      |
| C <sub>9</sub> H <sub>14</sub> O <sub>6</sub> -1 | 217.0716 | 7.41  | 0.02  | 169.0877 (C <sub>9</sub> H <sub>13</sub> O <sub>3</sub> ), 157.0504 (C <sub>7</sub> H <sub>9</sub> O <sub>4</sub> ), 153.0920 (C <sub>9</sub> H <sub>13</sub> O <sub>2</sub> ), 125.0974 (C <sub>8</sub> H <sub>13</sub> O), 113.0608 (C <sub>6</sub> H <sub>9</sub> O <sub>2</sub> ), 95.0502 (C <sub>6</sub> H <sub>7</sub> O), 85.0293 (C <sub>4</sub> H <sub>5</sub> O <sub>2</sub> ), 73.0296 (C <sub>3</sub> H <sub>5</sub> O <sub>2</sub> ), 59.0138 (C <sub>2</sub> H <sub>3</sub> O <sub>2</sub> ), 57.0344 (C <sub>3</sub> H <sub>5</sub> O) |
| C <sub>9</sub> H <sub>14</sub> O <sub>6</sub> -2 |          | 7.03  | 0.06  | 199.0612 (C <sub>9</sub> H <sub>11</sub> O <sub>5</sub> ), 171.0659 (C <sub>8</sub> H <sub>11</sub> O <sub>4</sub> ), 155.0717 (C <sub>8</sub> H <sub>11</sub> O <sub>3</sub> ), 129.0923 (C <sub>7</sub> H <sub>13</sub> O <sub>2</sub> ), 127.0764 (C <sub>7</sub> H <sub>11</sub> O <sub>2</sub> ), 111.0817 (C <sub>7</sub> H <sub>11</sub> O), 99.0090 (C <sub>4</sub> H <sub>3</sub> O <sub>3</sub> ), 85.0661 (C <sub>5</sub> H <sub>9</sub> O), 59.0138 (C <sub>2</sub> H <sub>3</sub> O <sub>2</sub> )                                        |
| C <sub>9</sub> H <sub>14</sub> O <sub>6</sub> -3 |          | 7.94  | 0.02  |                                                                                                                                                                                                                                                                                                                                                                                                                                                                                                                                                        |
| C <sub>9</sub> H <sub>14</sub> O <sub>6</sub> -4 |          | 10.49 | 0.03  |                                                                                                                                                                                                                                                                                                                                                                                                                                                                                                                                                        |
| C <sub>9</sub> H <sub>14</sub> O <sub>6</sub> -5 |          | 7.26  | 0.05  |                                                                                                                                                                                                                                                                                                                                                                                                                                                                                                                                                        |
| C <sub>9</sub> H <sub>16</sub> O <sub>5</sub> -1 | 203.0924 | 7.37  | 0.09  | 171.0661 (C <sub>8</sub> H <sub>11</sub> O <sub>4</sub> ), 127.0768 (C <sub>7</sub> H <sub>11</sub> O <sub>2</sub> )                                                                                                                                                                                                                                                                                                                                                                                                                                   |
| C <sub>9</sub> H <sub>16</sub> O <sub>5</sub> -2 |          | 3.53  | 0.10  |                                                                                                                                                                                                                                                                                                                                                                                                                                                                                                                                                        |
| C <sub>9</sub> H <sub>16</sub> O <sub>5</sub> -3 |          | 8.4   | 0.05  |                                                                                                                                                                                                                                                                                                                                                                                                                                                                                                                                                        |
| C <sub>9</sub> H <sub>16</sub> O <sub>6</sub>    | 219.0873 | 8.35  | 0.40  | 99.0451 (C <sub>5</sub> H <sub>7</sub> O <sub>2</sub> ), 85.0295 (C <sub>4</sub> H <sub>5</sub> O <sub>2</sub> ), 67.0189 (C <sub>4</sub> H <sub>3</sub> O), 59.0138 (C <sub>2</sub> H <sub>3</sub> O <sub>2</sub> ), 57.0348 (C <sub>3</sub> H <sub>5</sub> O)                                                                                                                                                                                                                                                                                        |

|                                                   |          |       |      |                                                                                                                                                                                                                                                                                                                                                                                                                                                                                                                                                                            |
|---------------------------------------------------|----------|-------|------|----------------------------------------------------------------------------------------------------------------------------------------------------------------------------------------------------------------------------------------------------------------------------------------------------------------------------------------------------------------------------------------------------------------------------------------------------------------------------------------------------------------------------------------------------------------------------|
| C <sub>10</sub> H <sub>14</sub> O <sub>4</sub> -1 | 197.0819 | 6.83  | 0.17 | 97.0658 (C <sub>6</sub> H <sub>9</sub> O), 83.0502 (C <sub>5</sub> H <sub>7</sub> O), 71.0502 (C <sub>4</sub> H <sub>7</sub> O), 69.0346 (C <sub>4</sub> H <sub>5</sub> O), 57.0348 (C <sub>3</sub> H <sub>5</sub> O)                                                                                                                                                                                                                                                                                                                                                      |
| C <sub>10</sub> H <sub>14</sub> O <sub>4</sub> -2 |          | 6.47  | 0.06 | 135.0817 (C <sub>9</sub> H <sub>11</sub> O), 125.0972 (C <sub>8</sub> H <sub>13</sub> O), 69.0346 (C <sub>4</sub> H <sub>5</sub> O), 57.0348 (C <sub>3</sub> H <sub>5</sub> O)                                                                                                                                                                                                                                                                                                                                                                                             |
| C <sub>10</sub> H <sub>14</sub> O <sub>4</sub> -3 |          | 7.18  | 0.06 | 153.0917 (C <sub>9</sub> H <sub>13</sub> O <sub>2</sub> ), 135.0817 (C <sub>9</sub> H <sub>11</sub> O), 83.0502 (C <sub>5</sub> H <sub>7</sub> O), 69.0346 (C <sub>4</sub> H <sub>5</sub> O), 59.0138 (C <sub>2</sub> H <sub>3</sub> O <sub>2</sub> )                                                                                                                                                                                                                                                                                                                      |
| C <sub>10</sub> H <sub>14</sub> O <sub>4</sub> -4 |          | 8.58  | 0.04 | 179.0713 (C <sub>10</sub> H <sub>11</sub> O <sub>3</sub> ), 153.0922 (C <sub>9</sub> H <sub>13</sub> O <sub>2</sub> ), 57.0348 (C <sub>3</sub> H <sub>5</sub> O)                                                                                                                                                                                                                                                                                                                                                                                                           |
| C <sub>10</sub> H <sub>14</sub> O <sub>5</sub> -1 | 213.0768 | 6.64  | 1.57 | 195.0667 (C <sub>10</sub> H <sub>11</sub> O <sub>4</sub> ), 169.0877 (C <sub>9</sub> H <sub>13</sub> O <sub>3</sub> ), 151.0763 (C <sub>9</sub> H <sub>11</sub> O <sub>2</sub> ), 141.0922 (C <sub>8</sub> H <sub>13</sub> O <sub>2</sub> ), 139.07633 (C <sub>8</sub> H <sub>11</sub> O <sub>2</sub> ), 123.0812 (C <sub>8</sub> H <sub>11</sub> O), 111.0452 (C <sub>6</sub> H <sub>7</sub> O <sub>2</sub> ), 71.0504 (C <sub>4</sub> H <sub>7</sub> O), 57.0348 (C <sub>3</sub> H <sub>5</sub> O)                                                                       |
| C <sub>10</sub> H <sub>14</sub> O <sub>5</sub> -2 |          | 7.3   | 0.16 |                                                                                                                                                                                                                                                                                                                                                                                                                                                                                                                                                                            |
| C <sub>10</sub> H <sub>14</sub> O <sub>5</sub> -3 |          | 6.29  | 0.08 |                                                                                                                                                                                                                                                                                                                                                                                                                                                                                                                                                                            |
| C <sub>10</sub> H <sub>14</sub> O <sub>5</sub> -4 |          | 9.05  | 0.04 |                                                                                                                                                                                                                                                                                                                                                                                                                                                                                                                                                                            |
| C <sub>10</sub> H <sub>14</sub> O <sub>5</sub> -5 |          | 16.29 | 0.05 |                                                                                                                                                                                                                                                                                                                                                                                                                                                                                                                                                                            |
| C <sub>10</sub> H <sub>14</sub> O <sub>6</sub> -1 | 229.0717 | 7.44  | 0.18 | 185.0819 (C <sub>9</sub> H <sub>13</sub> O <sub>4</sub> ), 171.0659 (C <sub>8</sub> H <sub>11</sub> O <sub>4</sub> ), 167.0717 (C <sub>9</sub> H <sub>11</sub> O <sub>3</sub> ), 141.0922 (C <sub>8</sub> H <sub>13</sub> O <sub>2</sub> ), 123.0812 (C <sub>8</sub> H <sub>11</sub> O), 113.0611 (C <sub>6</sub> H <sub>9</sub> O <sub>2</sub> ), 85.0293 (C <sub>4</sub> H <sub>5</sub> O <sub>2</sub> ), 75.0090 (C <sub>2</sub> H <sub>3</sub> O <sub>3</sub> ), 71.0135 (C <sub>3</sub> H <sub>3</sub> O <sub>2</sub> ), 57.0348 (C <sub>3</sub> H <sub>5</sub> O)    |
| C <sub>10</sub> H <sub>14</sub> O <sub>6</sub> -2 |          | 6.36  | 0.04 |                                                                                                                                                                                                                                                                                                                                                                                                                                                                                                                                                                            |
| C <sub>10</sub> H <sub>16</sub> O <sub>3</sub> -1 | 183.1027 | 10.98 | 0.55 | 183.1027 (C <sub>10</sub> H <sub>15</sub> O <sub>3</sub> ), 165.0921 (C <sub>10</sub> H <sub>13</sub> O <sub>2</sub> ), 141.0922 (C <sub>8</sub> H <sub>13</sub> O <sub>2</sub> ), 139.1127 (C <sub>9</sub> H <sub>15</sub> O), 123.0812 (C <sub>8</sub> H <sub>11</sub> O), 113.0611 (C <sub>6</sub> H <sub>9</sub> O <sub>2</sub> ), 97.0658 (C <sub>6</sub> H <sub>9</sub> O), 85.0658 (C <sub>5</sub> H <sub>9</sub> O), 69.0347 (C <sub>4</sub> H <sub>5</sub> O), 59.0138 (C <sub>2</sub> H <sub>3</sub> O <sub>2</sub> ), 57.0348 (C <sub>3</sub> H <sub>5</sub> O) |
| C <sub>10</sub> H <sub>16</sub> O <sub>3</sub> -2 |          | 20.8  | 0.28 | 183.1027 (C <sub>10</sub> H <sub>15</sub> O <sub>3</sub> ), 165.0921 (C <sub>10</sub> H <sub>13</sub> O <sub>2</sub> ), 141.0922 (C <sub>8</sub> H <sub>13</sub> O <sub>2</sub> ), 139.1127 (C <sub>9</sub> H <sub>15</sub> O), 123.0812 (C <sub>8</sub> H <sub>11</sub> O), 113.0611 (C <sub>6</sub> H <sub>9</sub> O <sub>2</sub> ), 69.0345 (C <sub>4</sub> H <sub>5</sub> O), 57.0348 (C <sub>3</sub> H <sub>5</sub> O)                                                                                                                                                |



|                                                   |          |       |      |                                                                                                                                                                                                                                                                                                                                                                                                                                                                                                                                                                                                                                                                                                                                                                                                                                                                                                                                                                              |
|---------------------------------------------------|----------|-------|------|------------------------------------------------------------------------------------------------------------------------------------------------------------------------------------------------------------------------------------------------------------------------------------------------------------------------------------------------------------------------------------------------------------------------------------------------------------------------------------------------------------------------------------------------------------------------------------------------------------------------------------------------------------------------------------------------------------------------------------------------------------------------------------------------------------------------------------------------------------------------------------------------------------------------------------------------------------------------------|
| C <sub>10</sub> H <sub>16</sub> O <sub>3</sub> -3 |          | 18.26 | 0.09 | 183.0659 (C <sub>9</sub> H <sub>11</sub> O <sub>4</sub> ), 141.0922 (C <sub>8</sub> H <sub>13</sub> O <sub>2</sub> ), 139.0764 (C <sub>8</sub> H <sub>11</sub> O <sub>2</sub> ), 123.0812 (C <sub>8</sub> H <sub>11</sub> O), 111.0813 (C <sub>7</sub> H <sub>11</sub> O), 95.0502 (C <sub>6</sub> H <sub>7</sub> O), 69.0345 (C <sub>4</sub> H <sub>5</sub> O), 57.0348 (C <sub>3</sub> H <sub>5</sub> O)                                                                                                                                                                                                                                                                                                                                                                                                                                                                                                                                                                   |
| C <sub>10</sub> H <sub>16</sub> O <sub>3</sub> -4 |          | 10.08 | 0.05 |                                                                                                                                                                                                                                                                                                                                                                                                                                                                                                                                                                                                                                                                                                                                                                                                                                                                                                                                                                              |
| C <sub>10</sub> H <sub>16</sub> O <sub>4</sub> -1 | 199.0975 | 9.65  | 0.63 | 181.0869 (C <sub>10</sub> H <sub>13</sub> O <sub>3</sub> ), 163.0764 (C <sub>10</sub> H <sub>11</sub> O <sub>2</sub> ), 155.1079 (C <sub>9</sub> H <sub>15</sub> O <sub>2</sub> ), 153.0920 (C <sub>9</sub> H <sub>13</sub> O <sub>2</sub> ), 137.0973 (C <sub>9</sub> H <sub>13</sub> O), 125.0971 (C <sub>8</sub> H <sub>13</sub> O), 123.0812 (C <sub>8</sub> H <sub>11</sub> O), 109.0656 (C <sub>7</sub> H <sub>9</sub> O), 101.0606 (C <sub>5</sub> H <sub>9</sub> O <sub>2</sub> ), 95.0502 (C <sub>6</sub> H <sub>7</sub> O), 85.0294 (C <sub>4</sub> H <sub>5</sub> O <sub>2</sub> ), 81.0347 (C <sub>3</sub> H <sub>5</sub> O), 75.0087 (C <sub>2</sub> H <sub>3</sub> O <sub>3</sub> ), 73.0295 (C <sub>3</sub> H <sub>5</sub> O <sub>2</sub> ), 69.0345 (C <sub>4</sub> H <sub>5</sub> O), 59.0138 (C <sub>2</sub> H <sub>3</sub> O <sub>2</sub> ), 57.0348 (C <sub>3</sub> H <sub>5</sub> O)                                                                    |
| C <sub>10</sub> H <sub>16</sub> O <sub>4</sub> -2 |          | 7.73  | 0.65 | 181.0869 (C <sub>10</sub> H <sub>13</sub> O <sub>3</sub> ), 169.0877 (C <sub>9</sub> H <sub>13</sub> O <sub>3</sub> ), 153.0920 (C <sub>9</sub> H <sub>13</sub> O <sub>2</sub> ), 137.0971 (C <sub>9</sub> H <sub>13</sub> O), 135.0820 (C <sub>9</sub> H <sub>11</sub> O), 129.0558 (C <sub>6</sub> H <sub>9</sub> O <sub>3</sub> ), 121.0656 (C <sub>8</sub> H <sub>9</sub> O), 101.0242 (C <sub>4</sub> H <sub>5</sub> O <sub>3</sub> ), 97.0659 (C <sub>6</sub> H <sub>9</sub> O), 83.0502 (C <sub>5</sub> H <sub>7</sub> O), 69.0346 (C <sub>4</sub> H <sub>5</sub> O), 59.0138 (C <sub>2</sub> H <sub>3</sub> O <sub>2</sub> ), 57.0348 (C <sub>3</sub> H <sub>5</sub> O)                                                                                                                                                                                                                                                                                              |
| C <sub>10</sub> H <sub>16</sub> O <sub>4</sub> -3 |          | 7.96  | 0.52 | 181.0869 (C <sub>10</sub> H <sub>13</sub> O <sub>3</sub> ), 141.0557 (C <sub>7</sub> H <sub>9</sub> O <sub>3</sub> ), 135.0816 (C <sub>9</sub> H <sub>11</sub> O), 129.0559 (C <sub>6</sub> H <sub>9</sub> O <sub>3</sub> ), 113.0608 (C <sub>6</sub> H <sub>9</sub> O <sub>2</sub> ), 101.0242 (C <sub>4</sub> H <sub>5</sub> O <sub>3</sub> ), 97.0658 (C <sub>6</sub> H <sub>9</sub> O), 85.0659 (C <sub>5</sub> H <sub>9</sub> O), 83.0501 (C <sub>5</sub> H <sub>7</sub> O), 71.0140 (C <sub>3</sub> H <sub>3</sub> O <sub>2</sub> ), 69.0346 (C <sub>4</sub> H <sub>5</sub> O), 59.0138 (C <sub>2</sub> H <sub>3</sub> O <sub>2</sub> ), 57.0348 (C <sub>3</sub> H <sub>5</sub> O)                                                                                                                                                                                                                                                                                     |
| C <sub>10</sub> H <sub>16</sub> O <sub>4</sub> -4 |          | 6.43  | 0.18 |                                                                                                                                                                                                                                                                                                                                                                                                                                                                                                                                                                                                                                                                                                                                                                                                                                                                                                                                                                              |
| C <sub>10</sub> H <sub>16</sub> O <sub>4</sub> -5 |          | 6.08  | 0.07 |                                                                                                                                                                                                                                                                                                                                                                                                                                                                                                                                                                                                                                                                                                                                                                                                                                                                                                                                                                              |
| C <sub>10</sub> H <sub>16</sub> O <sub>4</sub> -6 |          | 8.4   | 0.08 |                                                                                                                                                                                                                                                                                                                                                                                                                                                                                                                                                                                                                                                                                                                                                                                                                                                                                                                                                                              |
| C <sub>10</sub> H <sub>16</sub> O <sub>4</sub> -7 |          | 10.08 | 0.08 |                                                                                                                                                                                                                                                                                                                                                                                                                                                                                                                                                                                                                                                                                                                                                                                                                                                                                                                                                                              |
| C <sub>10</sub> H <sub>16</sub> O <sub>5</sub> -1 | 215.0925 | 10.14 | 1.73 | 173.0828 (C <sub>8</sub> H <sub>13</sub> O <sub>4</sub> ), 157.0505 (C <sub>7</sub> H <sub>9</sub> O <sub>4</sub> ), 153.0920 (C <sub>9</sub> H <sub>13</sub> O <sub>2</sub> ), 141.0922 (C <sub>8</sub> H <sub>13</sub> O <sub>2</sub> ), 135.0820 (C <sub>9</sub> H <sub>11</sub> O), 123.0812 (C <sub>8</sub> H <sub>11</sub> O), 113.0607 (C <sub>6</sub> H <sub>9</sub> O <sub>2</sub> ), 111.0818 (C <sub>7</sub> H <sub>11</sub> O), 97.0294 (C <sub>5</sub> H <sub>5</sub> O <sub>2</sub> ), 95.0502 (C <sub>6</sub> H <sub>7</sub> O), 87.0452 (C <sub>4</sub> H <sub>7</sub> O <sub>2</sub> ), 85.0294 (C <sub>4</sub> H <sub>5</sub> O <sub>2</sub> ), 83.0502 (C <sub>5</sub> H <sub>7</sub> O), 73.0295 (C <sub>3</sub> H <sub>5</sub> O <sub>2</sub> ), 71.0139 (C <sub>3</sub> H <sub>3</sub> O <sub>2</sub> ), 69.0347 (C <sub>4</sub> H <sub>5</sub> O), 59.0138 (C <sub>2</sub> H <sub>3</sub> O <sub>2</sub> ), 57.0348 (C <sub>3</sub> H <sub>5</sub> O) |

|                                                   |          |       |      |                                                                                                                                                                                                                                                                                                                                                                                                                                                                                                                                                                        |
|---------------------------------------------------|----------|-------|------|------------------------------------------------------------------------------------------------------------------------------------------------------------------------------------------------------------------------------------------------------------------------------------------------------------------------------------------------------------------------------------------------------------------------------------------------------------------------------------------------------------------------------------------------------------------------|
| C <sub>10</sub> H <sub>16</sub> O <sub>5</sub> -2 |          | 8.22  | 0.70 | 183.0659 (C <sub>9</sub> H <sub>11</sub> O <sub>4</sub> ), 171.1026 (C <sub>9</sub> H <sub>15</sub> O <sub>3</sub> ), 153.0920 (C <sub>9</sub> H <sub>13</sub> O <sub>2</sub> ), 127.1127 (C <sub>8</sub> H <sub>15</sub> O), 87.0451 (C <sub>4</sub> H <sub>7</sub> O <sub>2</sub> ), 85.0658 (C <sub>5</sub> H <sub>9</sub> O), 73.0295 (C <sub>3</sub> H <sub>5</sub> O <sub>2</sub> ), 59.0138 (C <sub>2</sub> H <sub>3</sub> O <sub>2</sub> ), 57.0348 (C <sub>3</sub> H <sub>5</sub> O)                                                                          |
| C <sub>10</sub> H <sub>16</sub> O <sub>5</sub> -3 |          | 7.48  | 0.33 | 169.0877 (C <sub>9</sub> H <sub>13</sub> O <sub>3</sub> ), 157.0504 (C <sub>7</sub> H <sub>9</sub> O <sub>4</sub> ), 153.0920 (C <sub>9</sub> H <sub>13</sub> O <sub>2</sub> ), 125.0974 (C <sub>8</sub> H <sub>13</sub> O), 113.0608 (C <sub>6</sub> H <sub>9</sub> O <sub>2</sub> ), 95.0502 (C <sub>6</sub> H <sub>7</sub> O), 85.0293 (C <sub>4</sub> H <sub>5</sub> O <sub>2</sub> ), 73.0296 (C <sub>3</sub> H <sub>5</sub> O <sub>2</sub> ), 59.0141 (C <sub>2</sub> H <sub>3</sub> O <sub>2</sub> )                                                            |
| C <sub>10</sub> H <sub>16</sub> O <sub>5</sub> -4 |          | 9.05  | 1.05 | 171.1026 (C <sub>9</sub> H <sub>15</sub> O <sub>3</sub> ), 169.0877 (C <sub>9</sub> H <sub>13</sub> O <sub>3</sub> ), 157.0872 (C <sub>8</sub> H <sub>13</sub> O <sub>3</sub> ), 153.0920 (C <sub>9</sub> H <sub>13</sub> O <sub>2</sub> ), 125.0970 (C <sub>8</sub> H <sub>13</sub> O), 99.0450 (C <sub>5</sub> H <sub>7</sub> O <sub>2</sub> ), 87.0087 (C <sub>3</sub> H <sub>3</sub> O <sub>3</sub> ), 85.0297 (C <sub>4</sub> H <sub>5</sub> O <sub>2</sub> ), 59.0138 (C <sub>2</sub> H <sub>3</sub> O <sub>2</sub> ), 57.0348 (C <sub>3</sub> H <sub>5</sub> O) |
| C <sub>10</sub> H <sub>16</sub> O <sub>5</sub> -5 |          | 9.36  | 0.22 |                                                                                                                                                                                                                                                                                                                                                                                                                                                                                                                                                                        |
| C <sub>10</sub> H <sub>16</sub> O <sub>5</sub> -6 |          | 11.16 | 0.19 |                                                                                                                                                                                                                                                                                                                                                                                                                                                                                                                                                                        |
| C <sub>10</sub> H <sub>16</sub> O <sub>6</sub> -1 | 231.0874 | 6.64  | 0.11 |                                                                                                                                                                                                                                                                                                                                                                                                                                                                                                                                                                        |
| C <sub>10</sub> H <sub>16</sub> O <sub>6</sub> -2 |          | 9.28  | 0.75 | 171.0671 (C <sub>8</sub> H <sub>11</sub> O <sub>4</sub> ), 127.0764 (C <sub>7</sub> H <sub>11</sub> O <sub>2</sub> ), 59.0138 (C <sub>2</sub> H <sub>3</sub> O <sub>2</sub> )                                                                                                                                                                                                                                                                                                                                                                                          |
| C <sub>10</sub> H <sub>16</sub> O <sub>6</sub> -3 |          | 10.71 | 0.81 | 189.0767 (C <sub>8</sub> H <sub>13</sub> O <sub>5</sub> ), 157.0504 (C <sub>7</sub> H <sub>9</sub> O <sub>4</sub> ), 109.0658 (C <sub>7</sub> H <sub>9</sub> O), 97.0658 (C <sub>6</sub> H <sub>9</sub> O), 85.0295 (C <sub>4</sub> H <sub>5</sub> O <sub>2</sub> ), 69.0345 (C <sub>4</sub> H <sub>5</sub> O), 59.0138 (C <sub>2</sub> H <sub>3</sub> O <sub>2</sub> )                                                                                                                                                                                                |
| C <sub>11</sub> H <sub>16</sub> O <sub>6</sub> -1 | 243.0874 | 11.03 | 0.40 | 185.0819 (C <sub>9</sub> H <sub>13</sub> O <sub>4</sub> ), 167.0717 (C <sub>9</sub> H <sub>11</sub> O <sub>3</sub> ), 141.0922 (C <sub>8</sub> H <sub>13</sub> O <sub>2</sub> ), 75.0088 (C <sub>2</sub> H <sub>3</sub> O <sub>3</sub> ), 71.0141 (C <sub>3</sub> H <sub>3</sub> O <sub>2</sub> )                                                                                                                                                                                                                                                                      |
| C <sub>11</sub> H <sub>16</sub> O <sub>6</sub> -2 |          | 12.75 | 0.01 |                                                                                                                                                                                                                                                                                                                                                                                                                                                                                                                                                                        |
| C <sub>12</sub> H <sub>20</sub> O <sub>5</sub> -1 | 243.1237 | 12.15 | 0.05 |                                                                                                                                                                                                                                                                                                                                                                                                                                                                                                                                                                        |
| C <sub>12</sub> H <sub>20</sub> O <sub>5</sub> -2 |          | 12    | 0.04 |                                                                                                                                                                                                                                                                                                                                                                                                                                                                                                                                                                        |
| C <sub>13</sub> H <sub>20</sub> O <sub>6</sub> -1 | 271.1184 | 13.37 | 0.09 | 185.0819 (C <sub>9</sub> H <sub>13</sub> O <sub>4</sub> ), 167.0717 (C <sub>9</sub> H <sub>11</sub> O <sub>3</sub> ), 141.0922 (C <sub>8</sub> H <sub>13</sub> O <sub>2</sub> ), 123.0812 (C <sub>8</sub> H <sub>11</sub> O), 99.0451 (C <sub>5</sub> H <sub>7</sub> O <sub>2</sub> ), 71.0138 (C <sub>3</sub> H <sub>3</sub> O <sub>2</sub> ), 57.0348 (C <sub>3</sub> H <sub>5</sub> O)                                                                                                                                                                              |
| C <sub>13</sub> H <sub>20</sub> O <sub>6</sub> -2 |          | 14.74 | 0.07 | 185.0819 (C <sub>9</sub> H <sub>13</sub> O <sub>4</sub> ), 167.0717 (C <sub>9</sub> H <sub>11</sub> O <sub>3</sub> ), 141.0922 (C <sub>8</sub> H <sub>13</sub> O <sub>2</sub> ), 123.0812 (C <sub>8</sub> H <sub>11</sub> O), 103.0400 (C <sub>4</sub> H <sub>7</sub> O <sub>3</sub> ), 85.0295 (C <sub>4</sub> H <sub>5</sub> O <sub>2</sub> ), 71.0139 (C <sub>3</sub> H <sub>3</sub> O <sub>2</sub> ), 57.0344 (C <sub>3</sub> H <sub>5</sub> O)                                                                                                                    |

|                                                   |          |       |      |                                                                                                                                                                                                                                                                                                                                                                                                                                       |
|---------------------------------------------------|----------|-------|------|---------------------------------------------------------------------------------------------------------------------------------------------------------------------------------------------------------------------------------------------------------------------------------------------------------------------------------------------------------------------------------------------------------------------------------------|
| C <sub>13</sub> H <sub>20</sub> O <sub>6</sub> -3 |          | 13.24 | 0.08 |                                                                                                                                                                                                                                                                                                                                                                                                                                       |
| C <sub>13</sub> H <sub>20</sub> O <sub>7</sub> -1 | 287.1136 | 9.08  | 0.10 | 185.0819 (C <sub>9</sub> H <sub>13</sub> O <sub>4</sub> ), 167.0717 (C <sub>9</sub> H <sub>11</sub> O <sub>3</sub> ), 141.0922 (C <sub>8</sub> H <sub>13</sub> O <sub>2</sub> ), 123.0812 (C <sub>8</sub> H <sub>11</sub> O), 85.0295 (C <sub>4</sub> H <sub>5</sub> O <sub>2</sub> ), 71.0138 (C <sub>3</sub> H <sub>3</sub> O <sub>2</sub> )                                                                                        |
| C <sub>13</sub> H <sub>20</sub> O <sub>7</sub> -2 |          | 9.81  | 0.05 | 185.0819 (C <sub>9</sub> H <sub>13</sub> O <sub>4</sub> ), 167.0717 (C <sub>9</sub> H <sub>11</sub> O <sub>3</sub> ), 141.0922 (C <sub>8</sub> H <sub>13</sub> O <sub>2</sub> ), 85.0295 (C <sub>4</sub> H <sub>5</sub> O <sub>2</sub> )                                                                                                                                                                                              |
| C <sub>14</sub> H <sub>22</sub> O <sub>6</sub> -1 | 285.1331 | 19.95 | 0.01 | 211.0612 (C <sub>10</sub> H <sub>11</sub> O <sub>5</sub> ), 167.0717 (C <sub>9</sub> H <sub>11</sub> O <sub>3</sub> )                                                                                                                                                                                                                                                                                                                 |
| C <sub>14</sub> H <sub>22</sub> O <sub>6</sub> -2 |          | 11.28 | 0.03 |                                                                                                                                                                                                                                                                                                                                                                                                                                       |
| C <sub>14</sub> H <sub>20</sub> O <sub>8</sub>    | 315.1084 | 10.24 | 0.44 | 185.0819 (C <sub>9</sub> H <sub>13</sub> O <sub>4</sub> ), 141.0922 (C <sub>8</sub> H <sub>13</sub> O <sub>2</sub> ), 129.0194 (C <sub>5</sub> H <sub>5</sub> O <sub>4</sub> ), 123.0819 (C <sub>8</sub> H <sub>11</sub> O), 111.0813 (C <sub>7</sub> H <sub>11</sub> O), 85.0295 (C <sub>4</sub> H <sub>5</sub> O <sub>2</sub> ), 71.0139 (C <sub>3</sub> H <sub>3</sub> O <sub>2</sub> )                                            |
| C <sub>15</sub> H <sub>22</sub> O <sub>6</sub> -1 | 297.1344 | 12.56 | 0.02 |                                                                                                                                                                                                                                                                                                                                                                                                                                       |
| C <sub>15</sub> H <sub>22</sub> O <sub>6</sub> -2 |          | 12.24 | 0.05 |                                                                                                                                                                                                                                                                                                                                                                                                                                       |
| C <sub>15</sub> H <sub>22</sub> O <sub>6</sub> -3 |          | 12.09 | 0.04 |                                                                                                                                                                                                                                                                                                                                                                                                                                       |
| C <sub>15</sub> H <sub>22</sub> O <sub>6</sub> -4 |          | 13.67 | 0.04 |                                                                                                                                                                                                                                                                                                                                                                                                                                       |
| C <sub>15</sub> H <sub>22</sub> O <sub>6</sub> -5 |          | 12.8  | 0.02 |                                                                                                                                                                                                                                                                                                                                                                                                                                       |
| C <sub>15</sub> H <sub>24</sub> O <sub>5</sub> -1 | 283.1549 | 15.5  | 0.07 | 143.0714 (C <sub>7</sub> H <sub>11</sub> O <sub>3</sub> ), 125.0610 (C <sub>7</sub> H <sub>9</sub> O <sub>2</sub> ), 85.0657 (C <sub>5</sub> H <sub>9</sub> O)                                                                                                                                                                                                                                                                        |
| C <sub>15</sub> H <sub>24</sub> O <sub>5</sub> -2 |          | 15.26 | 0.10 |                                                                                                                                                                                                                                                                                                                                                                                                                                       |
| C <sub>15</sub> H <sub>24</sub> O <sub>6</sub> -1 | 299.1499 | 15.46 | 0.12 | 189.0768 (C <sub>8</sub> H <sub>13</sub> O <sub>5</sub> ), 171.0659 (C <sub>8</sub> H <sub>11</sub> O <sub>4</sub> ), 85.0657 (C <sub>5</sub> H <sub>9</sub> O), 71.0502 (C <sub>4</sub> H <sub>7</sub> O)                                                                                                                                                                                                                            |
| C <sub>15</sub> H <sub>24</sub> O <sub>6</sub> -2 |          | 16.06 | 0.07 |                                                                                                                                                                                                                                                                                                                                                                                                                                       |
| C <sub>15</sub> H <sub>24</sub> O <sub>6</sub> -3 |          | 17.24 | 0.03 |                                                                                                                                                                                                                                                                                                                                                                                                                                       |
| C <sub>15</sub> H <sub>24</sub> O <sub>6</sub> -4 |          | 12.84 | 0.09 |                                                                                                                                                                                                                                                                                                                                                                                                                                       |
| C <sub>15</sub> H <sub>24</sub> O <sub>7</sub> -1 | 315.1448 | 13.11 | 0.07 | 185.0819 (C <sub>9</sub> H <sub>13</sub> O <sub>4</sub> ), 167.0717 (C <sub>9</sub> H <sub>11</sub> O <sub>3</sub> ), 141.0922 (C <sub>8</sub> H <sub>13</sub> O <sub>2</sub> ), 129.0559 (C <sub>6</sub> H <sub>9</sub> O <sub>3</sub> ), 123.0812 (C <sub>8</sub> H <sub>11</sub> O), 85.0658 (C <sub>5</sub> H <sub>9</sub> O), 71.0139 (C <sub>3</sub> H <sub>3</sub> O <sub>2</sub> ), 57.0348 (C <sub>3</sub> H <sub>5</sub> O) |
| C <sub>15</sub> H <sub>24</sub> O <sub>7</sub> -2 |          | 11.97 | 0.12 | 185.0819 (C <sub>9</sub> H <sub>13</sub> O <sub>4</sub> ), 171.0662 (C <sub>8</sub> H <sub>11</sub> O <sub>4</sub> ), 157.0872 (C <sub>8</sub> H <sub>13</sub> O <sub>3</sub> ), 143.0717 (C <sub>7</sub> H <sub>11</sub> O <sub>3</sub> ), 141.0924 (C <sub>8</sub> H <sub>13</sub> O <sub>2</sub> ),                                                                                                                                |

|                                                   |          |       |      |                                                                                                                                                                                                                                                                                                                                                                                                                                                                                                                                                                                                                                                                                                                                                                                                                                                                                                                                                                                    |
|---------------------------------------------------|----------|-------|------|------------------------------------------------------------------------------------------------------------------------------------------------------------------------------------------------------------------------------------------------------------------------------------------------------------------------------------------------------------------------------------------------------------------------------------------------------------------------------------------------------------------------------------------------------------------------------------------------------------------------------------------------------------------------------------------------------------------------------------------------------------------------------------------------------------------------------------------------------------------------------------------------------------------------------------------------------------------------------------|
|                                                   |          |       |      | 127.0765 (C <sub>7</sub> H <sub>11</sub> O <sub>2</sub> ), 125.0761 (C <sub>7</sub> H <sub>9</sub> O <sub>2</sub> ), 109.0656 (C <sub>7</sub> H <sub>9</sub> O), 85.0658 (C <sub>5</sub> H <sub>9</sub> O)                                                                                                                                                                                                                                                                                                                                                                                                                                                                                                                                                                                                                                                                                                                                                                         |
| C <sub>15</sub> H <sub>24</sub> O <sub>7</sub> -3 |          | 11.71 | 0.03 | 185.0819 (C <sub>9</sub> H <sub>13</sub> O <sub>4</sub> ), 171.0659 (C <sub>8</sub> H <sub>11</sub> O <sub>4</sub> ), 167.0717 (C <sub>9</sub> H <sub>11</sub> O <sub>3</sub> ), 141.0922 (C <sub>8</sub> H <sub>13</sub> O <sub>2</sub> ), 127.0764 (C <sub>7</sub> H <sub>11</sub> O <sub>2</sub> ), 59.0138 (C <sub>2</sub> H <sub>3</sub> O <sub>2</sub> )                                                                                                                                                                                                                                                                                                                                                                                                                                                                                                                                                                                                                     |
| C <sub>15</sub> H <sub>24</sub> O <sub>7</sub> -4 |          | 13.01 | 0.03 |                                                                                                                                                                                                                                                                                                                                                                                                                                                                                                                                                                                                                                                                                                                                                                                                                                                                                                                                                                                    |
| C <sub>15</sub> H <sub>24</sub> O <sub>8</sub> -1 | 332.0309 | 13.53 | 0.09 | 261.0626 (C <sub>10</sub> H <sub>13</sub> O <sub>8</sub> ), 199.0611 (C <sub>9</sub> H <sub>11</sub> O <sub>5</sub> ), 189.0762 (C <sub>8</sub> H <sub>13</sub> O <sub>5</sub> ), 173.0451 (C <sub>7</sub> H <sub>9</sub> O <sub>5</sub> ), 171.0671 (C <sub>8</sub> H <sub>11</sub> O <sub>4</sub> ), 155.0715 (C <sub>8</sub> H <sub>11</sub> O <sub>3</sub> ), 145.0875 (C <sub>7</sub> H <sub>13</sub> O <sub>3</sub> ), 137.0612 (C <sub>8</sub> H <sub>9</sub> O <sub>2</sub> ), 131.0350 (C <sub>5</sub> H <sub>7</sub> O <sub>4</sub> ), 129.0194 (C <sub>5</sub> H <sub>5</sub> O <sub>4</sub> ), 127.0760 (C <sub>7</sub> H <sub>11</sub> O <sub>2</sub> ), 111.0813 (C <sub>7</sub> H <sub>11</sub> O), 95.0506 (C <sub>6</sub> H <sub>7</sub> O), 87.0449 (C <sub>4</sub> H <sub>7</sub> O <sub>2</sub> ), 85.0295 (C <sub>4</sub> H <sub>5</sub> O <sub>2</sub> ), 59.0138 (C <sub>2</sub> H <sub>3</sub> O <sub>2</sub> ), 57.0348 (C <sub>3</sub> H <sub>5</sub> O) |
| C <sub>15</sub> H <sub>24</sub> O <sub>8</sub> -2 |          | 10.99 | 0.11 | 183.1027 (C <sub>10</sub> H <sub>15</sub> O <sub>3</sub> ), 171.0659 (C <sub>8</sub> H <sub>11</sub> O <sub>4</sub> ), 159.0669 (C <sub>7</sub> H <sub>11</sub> O <sub>4</sub> ), 127.0764 (C <sub>7</sub> H <sub>11</sub> O <sub>2</sub> ), 101.0246 (C <sub>4</sub> H <sub>5</sub> O <sub>3</sub> ), 97.0661 (C <sub>6</sub> H <sub>9</sub> O), 59.0138 (C <sub>2</sub> H <sub>3</sub> O <sub>2</sub> ), 57.0348 (C <sub>3</sub> H <sub>5</sub> O)                                                                                                                                                                                                                                                                                                                                                                                                                                                                                                                               |
| C <sub>15</sub> H <sub>24</sub> O <sub>8</sub> -3 |          | 12.97 | 0.10 |                                                                                                                                                                                                                                                                                                                                                                                                                                                                                                                                                                                                                                                                                                                                                                                                                                                                                                                                                                                    |
| C <sub>15</sub> H <sub>26</sub> O <sub>6</sub> -1 | 301.1656 | 14.2  | 0.11 | 185.0819 (C <sub>9</sub> H <sub>13</sub> O <sub>4</sub> ), 141.0924 (C <sub>8</sub> H <sub>13</sub> O <sub>2</sub> )                                                                                                                                                                                                                                                                                                                                                                                                                                                                                                                                                                                                                                                                                                                                                                                                                                                               |
| C <sub>15</sub> H <sub>26</sub> O <sub>6</sub> -2 |          | 12.43 | 0.16 | 185.0819 (C <sub>9</sub> H <sub>13</sub> O <sub>4</sub> ), 167.0717 (C <sub>9</sub> H <sub>11</sub> O <sub>3</sub> ), 141.0922 (C <sub>8</sub> H <sub>13</sub> O <sub>2</sub> ), 129.0559 (C <sub>6</sub> H <sub>9</sub> O <sub>3</sub> ), 123.0812 (C <sub>8</sub> H <sub>11</sub> O), 97.0661 (C <sub>6</sub> H <sub>9</sub> O), 81.0345 (C <sub>5</sub> H <sub>5</sub> O), 57.0348 (C <sub>3</sub> H <sub>5</sub> O)                                                                                                                                                                                                                                                                                                                                                                                                                                                                                                                                                            |
| C <sub>15</sub> H <sub>26</sub> O <sub>6</sub> -3 |          | 12.83 | 0.16 |                                                                                                                                                                                                                                                                                                                                                                                                                                                                                                                                                                                                                                                                                                                                                                                                                                                                                                                                                                                    |
| C <sub>15</sub> H <sub>26</sub> O <sub>6</sub> -4 |          | 13.75 | 0.06 |                                                                                                                                                                                                                                                                                                                                                                                                                                                                                                                                                                                                                                                                                                                                                                                                                                                                                                                                                                                    |
| C <sub>15</sub> H <sub>26</sub> O <sub>6</sub> -5 |          | 15.71 | 0.04 |                                                                                                                                                                                                                                                                                                                                                                                                                                                                                                                                                                                                                                                                                                                                                                                                                                                                                                                                                                                    |
| C <sub>15</sub> H <sub>26</sub> O <sub>6</sub> -6 |          | 16.36 | 0.03 |                                                                                                                                                                                                                                                                                                                                                                                                                                                                                                                                                                                                                                                                                                                                                                                                                                                                                                                                                                                    |
| C <sub>15</sub> H <sub>26</sub> O <sub>6</sub> -7 |          | 18.31 | 0.03 |                                                                                                                                                                                                                                                                                                                                                                                                                                                                                                                                                                                                                                                                                                                                                                                                                                                                                                                                                                                    |
| C <sub>16</sub> H <sub>22</sub> O <sub>7</sub> -1 | 325.1292 | 14.61 | 0.09 | 199.0974 (C <sub>10</sub> H <sub>15</sub> O <sub>4</sub> ), 185.0819 (C <sub>9</sub> H <sub>13</sub> O <sub>4</sub> ), 167.0717 (C <sub>9</sub> H <sub>11</sub> O <sub>3</sub> ), 157.0506 (C <sub>7</sub> H <sub>9</sub> O <sub>4</sub> ), 143.0349 (C <sub>6</sub> H <sub>7</sub> O <sub>4</sub> ), 141.0924 (C <sub>8</sub> H <sub>13</sub> O <sub>2</sub> ), 139.0398 (C <sub>7</sub> H <sub>7</sub> O <sub>3</sub> ), 123.0820 (C <sub>8</sub> H <sub>11</sub> O), 111.0452 (C <sub>6</sub> H <sub>7</sub> O <sub>2</sub> ), 97.295 (C <sub>5</sub> H <sub>5</sub> O <sub>2</sub> ),                                                                                                                                                                                                                                                                                                                                                                                          |

|                                                   |          |       |      |                                                                                                                                                                                                                                                                                                                                                                                                                                                                                                                                                               |
|---------------------------------------------------|----------|-------|------|---------------------------------------------------------------------------------------------------------------------------------------------------------------------------------------------------------------------------------------------------------------------------------------------------------------------------------------------------------------------------------------------------------------------------------------------------------------------------------------------------------------------------------------------------------------|
| C <sub>16</sub> H <sub>22</sub> O <sub>7</sub> -2 |          | 12.81 | 0.05 | 85.0294 (C <sub>4</sub> H <sub>5</sub> O <sub>2</sub> ), 71.0138 (C <sub>3</sub> H <sub>3</sub> O <sub>2</sub> ), 59.0138 (C <sub>2</sub> H <sub>3</sub> O <sub>2</sub> )                                                                                                                                                                                                                                                                                                                                                                                     |
| C <sub>16</sub> H <sub>24</sub> O <sub>5</sub> -1 | 295.1547 | 19.86 | 0.01 |                                                                                                                                                                                                                                                                                                                                                                                                                                                                                                                                                               |
| C <sub>16</sub> H <sub>24</sub> O <sub>5</sub> -2 |          | 13.21 | 0.03 |                                                                                                                                                                                                                                                                                                                                                                                                                                                                                                                                                               |
| C <sub>16</sub> H <sub>24</sub> O <sub>5</sub> -3 |          | 14.48 | 0.02 |                                                                                                                                                                                                                                                                                                                                                                                                                                                                                                                                                               |
| C <sub>16</sub> H <sub>24</sub> O <sub>5</sub> -4 |          | 12.95 | 0.02 |                                                                                                                                                                                                                                                                                                                                                                                                                                                                                                                                                               |
| C <sub>16</sub> H <sub>24</sub> O <sub>6</sub> -1 | 311.1501 | 13.52 | 2.39 | 185.0819 (C <sub>9</sub> H <sub>13</sub> O <sub>4</sub> ), 167.0717 (C <sub>9</sub> H <sub>11</sub> O <sub>3</sub> ), 143.0712 (C <sub>7</sub> H <sub>11</sub> O <sub>3</sub> ), 141.0922 (C <sub>8</sub> H <sub>13</sub> O <sub>2</sub> ), 125.0612 (C <sub>7</sub> H <sub>9</sub> O <sub>2</sub> ), 123.0812 (C <sub>8</sub> H <sub>11</sub> O), 85.0297 (C <sub>4</sub> H <sub>5</sub> O <sub>2</sub> ), 81.0345 (C <sub>5</sub> H <sub>5</sub> O), 71.0135 (C <sub>3</sub> H <sub>3</sub> O <sub>2</sub> ), 57.0348 (C <sub>3</sub> H <sub>5</sub> O)     |
| C <sub>16</sub> H <sub>24</sub> O <sub>6</sub> -2 |          | 14.76 | 0.13 |                                                                                                                                                                                                                                                                                                                                                                                                                                                                                                                                                               |
| C <sub>16</sub> H <sub>24</sub> O <sub>6</sub> -3 |          | 15.55 | 0.08 |                                                                                                                                                                                                                                                                                                                                                                                                                                                                                                                                                               |
| C <sub>16</sub> H <sub>24</sub> O <sub>6</sub> -4 |          | 17.02 | 0.05 |                                                                                                                                                                                                                                                                                                                                                                                                                                                                                                                                                               |
| C <sub>16</sub> H <sub>24</sub> O <sub>6</sub> -5 |          | 19.62 | 0.02 |                                                                                                                                                                                                                                                                                                                                                                                                                                                                                                                                                               |
| C <sub>16</sub> H <sub>24</sub> O <sub>7</sub> -1 | 327.1449 | 13.91 | 0.12 | 199.0974 (C <sub>10</sub> H <sub>15</sub> O <sub>4</sub> ), 185.0819 (C <sub>9</sub> H <sub>13</sub> O <sub>4</sub> ), 169.0872 (C <sub>9</sub> H <sub>13</sub> O <sub>3</sub> ), 167.0717 (C <sub>9</sub> H <sub>11</sub> O <sub>3</sub> ), 141.0924 (C <sub>8</sub> H <sub>13</sub> O <sub>2</sub> ), 123.0812 (C <sub>8</sub> H <sub>11</sub> O), 111.0813 (C <sub>7</sub> H <sub>11</sub> O), 85.0297 (C <sub>4</sub> H <sub>5</sub> O <sub>2</sub> ), 73.0296 (C <sub>3</sub> H <sub>5</sub> O <sub>2</sub> ), 57.0348 (C <sub>3</sub> H <sub>5</sub> O) |
| C <sub>16</sub> H <sub>24</sub> O <sub>7</sub> -2 |          | 13.16 | 0.04 | 185.0819 (C <sub>9</sub> H <sub>13</sub> O <sub>4</sub> ), 171.0659 (C <sub>8</sub> H <sub>11</sub> O <sub>4</sub> ), 155.0717 (C <sub>8</sub> H <sub>11</sub> O <sub>3</sub> ), 111.0816 (C <sub>7</sub> H <sub>11</sub> O), 85.0659 (C <sub>3</sub> H <sub>9</sub> O)                                                                                                                                                                                                                                                                                       |
| C <sub>16</sub> H <sub>24</sub> O <sub>7</sub> -3 |          | 11.11 | 0.14 |                                                                                                                                                                                                                                                                                                                                                                                                                                                                                                                                                               |
| C <sub>16</sub> H <sub>24</sub> O <sub>7</sub> -4 |          | 11.89 | 0.05 |                                                                                                                                                                                                                                                                                                                                                                                                                                                                                                                                                               |
| C <sub>16</sub> H <sub>24</sub> O <sub>8</sub> -1 | 343.1399 | 13.78 | 0.70 | 185.0819 (C <sub>9</sub> H <sub>13</sub> O <sub>4</sub> ), 167.0717 (C <sub>9</sub> H <sub>11</sub> O <sub>3</sub> ), 157.0505 (C <sub>7</sub> H <sub>9</sub> O <sub>4</sub> ), 141.0922 (C <sub>8</sub> H <sub>13</sub> O <sub>2</sub> ), 123.0812 (C <sub>8</sub> H <sub>11</sub> O), 113.0611 (C <sub>6</sub> H <sub>9</sub> O <sub>2</sub> ), 71.0139 (C <sub>3</sub> H <sub>3</sub> O <sub>2</sub> )                                                                                                                                                     |
| C <sub>16</sub> H <sub>24</sub> O <sub>8</sub> -2 |          | 11.82 | 0.07 | 189.0768 (C <sub>8</sub> H <sub>13</sub> O <sub>5</sub> ), 171.0659 (C <sub>8</sub> H <sub>11</sub> O <sub>4</sub> ), 127.0765 (C <sub>7</sub> H <sub>11</sub> O <sub>2</sub> )                                                                                                                                                                                                                                                                                                                                                                               |
| C <sub>16</sub> H <sub>24</sub> O <sub>8</sub> -3 |          | 13.39 | 0.03 |                                                                                                                                                                                                                                                                                                                                                                                                                                                                                                                                                               |

|                                                   |          |       |      |                                                                                                                                                                                                                                                                                                                                                                                                                                                                                                                                                               |
|---------------------------------------------------|----------|-------|------|---------------------------------------------------------------------------------------------------------------------------------------------------------------------------------------------------------------------------------------------------------------------------------------------------------------------------------------------------------------------------------------------------------------------------------------------------------------------------------------------------------------------------------------------------------------|
| C <sub>16</sub> H <sub>26</sub> O <sub>5</sub> -1 | 297.1711 | 16.85 | 0.05 |                                                                                                                                                                                                                                                                                                                                                                                                                                                                                                                                                               |
| C <sub>16</sub> H <sub>26</sub> O <sub>5</sub> -2 |          | 17.09 | 0.02 |                                                                                                                                                                                                                                                                                                                                                                                                                                                                                                                                                               |
| C <sub>16</sub> H <sub>26</sub> O <sub>5</sub> -3 |          | 13.01 | 0.01 |                                                                                                                                                                                                                                                                                                                                                                                                                                                                                                                                                               |
| C <sub>16</sub> H <sub>26</sub> O <sub>6</sub> -1 | 313.1655 | 16.78 | 2.20 | 185.0819 (C <sub>9</sub> H <sub>13</sub> O <sub>4</sub> ), 167.0717 (C <sub>9</sub> H <sub>11</sub> O <sub>3</sub> ), 141.0922 (C <sub>8</sub> H <sub>13</sub> O <sub>2</sub> ), 123.0812 (C <sub>8</sub> H <sub>11</sub> O), 99.0451 (C <sub>5</sub> H <sub>7</sub> O <sub>2</sub> ), 71.0138 (C <sub>3</sub> H <sub>3</sub> O <sub>2</sub> ), 57.0348 (C <sub>3</sub> H <sub>5</sub> O)                                                                                                                                                                     |
| C <sub>16</sub> H <sub>26</sub> O <sub>6</sub> -2 |          | 18.47 | 0.26 | 171.0661 (C <sub>8</sub> H <sub>11</sub> O <sub>4</sub> ), 141.0922 (C <sub>8</sub> H <sub>13</sub> O <sub>2</sub> ), 127.0764 (C <sub>7</sub> H <sub>11</sub> O <sub>2</sub> ), 109.0658 (C <sub>7</sub> H <sub>9</sub> O)                                                                                                                                                                                                                                                                                                                                   |
| C <sub>16</sub> H <sub>26</sub> O <sub>6</sub> -3 |          | 16.05 | 0.12 | 157.0869 (C <sub>8</sub> H <sub>13</sub> O <sub>3</sub> ), 155.0713 (C <sub>8</sub> H <sub>11</sub> O <sub>3</sub> ), 125.0609 (C <sub>7</sub> H <sub>9</sub> O <sub>2</sub> ), 111.0816 (C <sub>7</sub> H <sub>11</sub> O), 71.0502 (C <sub>4</sub> H <sub>7</sub> O)                                                                                                                                                                                                                                                                                        |
| C <sub>16</sub> H <sub>26</sub> O <sub>6</sub> -4 |          | 15.05 | 0.10 | 171.0661 (C <sub>8</sub> H <sub>11</sub> O <sub>4</sub> ), 157.0504 (C <sub>7</sub> H <sub>9</sub> O <sub>4</sub> ), 139.1131 (C <sub>9</sub> H <sub>15</sub> O), 127.0764 (C <sub>7</sub> H <sub>11</sub> O <sub>2</sub> ), 113.0608 (C <sub>6</sub> H <sub>9</sub> O <sub>2</sub> ), 71.0503 (C <sub>4</sub> H <sub>7</sub> O)                                                                                                                                                                                                                              |
| C <sub>16</sub> H <sub>26</sub> O <sub>6</sub> -5 |          | 18.01 | 0.16 |                                                                                                                                                                                                                                                                                                                                                                                                                                                                                                                                                               |
| C <sub>16</sub> H <sub>26</sub> O <sub>7</sub> -1 | 329.1604 | 15.22 | 0.77 | 285.1709 (C <sub>15</sub> H <sub>25</sub> O <sub>5</sub> ), 267.1602 (C <sub>15</sub> H <sub>23</sub> O <sub>4</sub> ), 171.0662 (C <sub>8</sub> H <sub>11</sub> O <sub>4</sub> ), 157.0869 (C <sub>8</sub> H <sub>13</sub> O <sub>3</sub> ), 145.0870 (C <sub>7</sub> H <sub>13</sub> O <sub>3</sub> ), 127.0765 (C <sub>7</sub> H <sub>11</sub> O <sub>2</sub> ), 109.0657 (C <sub>7</sub> H <sub>9</sub> O), 85.0658 (C <sub>5</sub> H <sub>9</sub> O), 71.0502 (C <sub>4</sub> H <sub>7</sub> O), 59.0138 (C <sub>2</sub> H <sub>3</sub> O <sub>2</sub> ) |
| C <sub>16</sub> H <sub>26</sub> O <sub>7</sub> -2 |          | 14.88 | 0.19 | 171.0661 (C <sub>8</sub> H <sub>11</sub> O <sub>4</sub> ), 157.0874 (C <sub>8</sub> H <sub>13</sub> O <sub>3</sub> ), 145.0870 (C <sub>7</sub> H <sub>13</sub> O <sub>3</sub> ), 141.0922 (C <sub>8</sub> H <sub>13</sub> O <sub>2</sub> ), 127.0764 (C <sub>7</sub> H <sub>11</sub> O <sub>2</sub> ), 111.0817 (C <sub>7</sub> H <sub>11</sub> O), 85.0658 (C <sub>5</sub> H <sub>9</sub> O)                                                                                                                                                                 |
| C <sub>16</sub> H <sub>26</sub> O <sub>7</sub> -3 |          | 14.22 | 0.12 | 201.0769 (C <sub>9</sub> H <sub>13</sub> O <sub>5</sub> ), 185.0819 (C <sub>9</sub> H <sub>13</sub> O <sub>4</sub> ), 167.0717 (C <sub>9</sub> H <sub>11</sub> O <sub>3</sub> ), 141.0922 (C <sub>8</sub> H <sub>13</sub> O <sub>2</sub> ), 123.0812 (C <sub>8</sub> H <sub>11</sub> O), 57.0348 (C <sub>3</sub> H <sub>5</sub> O)                                                                                                                                                                                                                            |
| C <sub>16</sub> H <sub>26</sub> O <sub>7</sub> -4 |          | 13.35 | 0.12 | 185.0819 (C <sub>9</sub> H <sub>13</sub> O <sub>4</sub> ), 167.0717 (C <sub>9</sub> H <sub>11</sub> O <sub>3</sub> ), 157.0872 (C <sub>8</sub> H <sub>13</sub> O <sub>3</sub> ), 141.0922 (C <sub>8</sub> H <sub>13</sub> O <sub>2</sub> ), 123.0812 (C <sub>8</sub> H <sub>11</sub> O), 111.0817 (C <sub>7</sub> H <sub>11</sub> O), 99.0454 (C <sub>5</sub> H <sub>7</sub> O <sub>2</sub> ), 71.0142 (C <sub>3</sub> H <sub>3</sub> O <sub>2</sub> ), 57.0348 (C <sub>3</sub> H <sub>5</sub> O)                                                             |
| C <sub>16</sub> H <sub>26</sub> O <sub>7</sub> -5 |          | 12.54 | 0.14 | 185.0819 (C <sub>9</sub> H <sub>13</sub> O <sub>4</sub> ), 171.0659 (C <sub>8</sub> H <sub>11</sub> O <sub>4</sub> ), 157.0872 (C <sub>8</sub> H <sub>13</sub> O <sub>3</sub> ), 127.0764 (C <sub>7</sub> H <sub>11</sub> O <sub>2</sub> ), 111.0813 (C <sub>7</sub> H <sub>11</sub> O)                                                                                                                                                                                                                                                                       |
| C <sub>16</sub> H <sub>26</sub> O <sub>7</sub> -6 |          | 13.17 | 0.10 | 185.0819 (C <sub>9</sub> H <sub>13</sub> O <sub>4</sub> ), 167.0717 (C <sub>9</sub> H <sub>11</sub> O <sub>3</sub> ), 141.0922 (C <sub>8</sub> H <sub>13</sub> O <sub>2</sub> ), 123.0812 (C <sub>8</sub> H <sub>11</sub> O), 99.0451 (C <sub>5</sub> H <sub>7</sub> O <sub>2</sub> ), 71.0138 (C <sub>3</sub> H <sub>3</sub> O <sub>2</sub> )                                                                                                                                                                                                                |

|                                                   |          |       |      |                                                                                                                                                                                                                                                                                                                                                                                                                            |
|---------------------------------------------------|----------|-------|------|----------------------------------------------------------------------------------------------------------------------------------------------------------------------------------------------------------------------------------------------------------------------------------------------------------------------------------------------------------------------------------------------------------------------------|
| C <sub>16</sub> H <sub>26</sub> O <sub>7</sub> -7 |          | 15.7  | 0.04 |                                                                                                                                                                                                                                                                                                                                                                                                                            |
| C <sub>16</sub> H <sub>26</sub> O <sub>7</sub> -8 |          | 16.84 | 0.07 |                                                                                                                                                                                                                                                                                                                                                                                                                            |
| C <sub>16</sub> H <sub>26</sub> O <sub>8</sub> -1 | 345.1555 | 13.21 | 0.05 | 189.0768 (C <sub>8</sub> H <sub>13</sub> O <sub>5</sub> ), 185.0819 (C <sub>9</sub> H <sub>13</sub> O <sub>4</sub> ), 169.0872 (C <sub>9</sub> H <sub>13</sub> O <sub>3</sub> ), 141.0922 (C <sub>8</sub> H <sub>13</sub> O <sub>2</sub> ), 127.0764 (C <sub>7</sub> H <sub>11</sub> O <sub>2</sub> ), 85.0658 (C <sub>5</sub> H <sub>9</sub> O)                                                                           |
| C <sub>16</sub> H <sub>26</sub> O <sub>8</sub> -2 |          | 12.86 | 0.05 | 189.0768 (C <sub>8</sub> H <sub>13</sub> O <sub>5</sub> ), 171.0659 (C <sub>8</sub> H <sub>11</sub> O <sub>4</sub> ), 145.0870 (C <sub>7</sub> H <sub>13</sub> O <sub>3</sub> ), 127.0764 (C <sub>7</sub> H <sub>11</sub> O <sub>2</sub> ), 101.0974 (C <sub>6</sub> H <sub>13</sub> O), 85.0658 (C <sub>5</sub> H <sub>9</sub> O), 57.0348 (C <sub>3</sub> H <sub>5</sub> O)                                              |
| C <sub>16</sub> H <sub>26</sub> O <sub>8</sub> -3 |          | 13.8  | 0.05 |                                                                                                                                                                                                                                                                                                                                                                                                                            |
| C <sub>16</sub> H <sub>26</sub> O <sub>8</sub> -4 |          | 15.82 | 0.04 |                                                                                                                                                                                                                                                                                                                                                                                                                            |
| C <sub>16</sub> H <sub>26</sub> O <sub>8</sub> -5 |          | 11.14 | 0.04 |                                                                                                                                                                                                                                                                                                                                                                                                                            |
| C <sub>16</sub> H <sub>26</sub> O <sub>8</sub> -6 |          | 11.57 | 0.04 |                                                                                                                                                                                                                                                                                                                                                                                                                            |
| C <sub>16</sub> H <sub>26</sub> O <sub>9</sub> -1 | 361.1504 | 14.47 | 0.09 |                                                                                                                                                                                                                                                                                                                                                                                                                            |
| C <sub>16</sub> H <sub>26</sub> O <sub>9</sub> -2 |          | 12.39 | 0.07 |                                                                                                                                                                                                                                                                                                                                                                                                                            |
| C <sub>16</sub> H <sub>26</sub> O <sub>9</sub> -3 |          | 12.07 | 0.04 |                                                                                                                                                                                                                                                                                                                                                                                                                            |
| C <sub>16</sub> H <sub>26</sub> O <sub>9</sub> -4 |          | 12.65 | 0.03 |                                                                                                                                                                                                                                                                                                                                                                                                                            |
| C <sub>17</sub> H <sub>24</sub> O <sub>6</sub> -1 | 323.1498 | 16.72 | 0.05 |                                                                                                                                                                                                                                                                                                                                                                                                                            |
| C <sub>17</sub> H <sub>24</sub> O <sub>6</sub> -2 |          | 16.18 | 0.02 |                                                                                                                                                                                                                                                                                                                                                                                                                            |
| C <sub>17</sub> H <sub>26</sub> O <sub>5</sub> -1 | 309.1704 | 15.44 | 0.13 | 221.1915 (C <sub>15</sub> H <sub>25</sub> O), 167.0717 (C <sub>9</sub> H <sub>11</sub> O <sub>3</sub> ), 141.0922 (C <sub>8</sub> H <sub>13</sub> O <sub>2</sub> ), 139.1127 (C <sub>9</sub> H <sub>15</sub> O), 123.0812 (C <sub>8</sub> H <sub>11</sub> O), 113.0611 (C <sub>6</sub> H <sub>9</sub> O <sub>2</sub> ), 99.0454 (C <sub>5</sub> H <sub>7</sub> O <sub>2</sub> ), 57.0348 (C <sub>3</sub> H <sub>5</sub> O) |
| C <sub>17</sub> H <sub>26</sub> O <sub>5</sub> -2 |          | 15.76 | 0.39 |                                                                                                                                                                                                                                                                                                                                                                                                                            |
| C <sub>17</sub> H <sub>26</sub> O <sub>5</sub> -3 |          | 18.99 | 0.05 |                                                                                                                                                                                                                                                                                                                                                                                                                            |
| C <sub>17</sub> H <sub>26</sub> O <sub>5</sub> -4 |          | 19.36 | 0.02 |                                                                                                                                                                                                                                                                                                                                                                                                                            |
| C <sub>17</sub> H <sub>26</sub> O <sub>6</sub> -1 | 325.1654 | 16.56 | 0.56 | 185.0819 (C <sub>9</sub> H <sub>13</sub> O <sub>4</sub> ), 167.0717 (C <sub>9</sub> H <sub>11</sub> O <sub>3</sub> ), 141.0922 (C <sub>8</sub> H <sub>13</sub> O <sub>2</sub> ), 123.0812 (C <sub>8</sub> H <sub>11</sub> O), 57.0348 (C <sub>3</sub> H <sub>5</sub> O)                                                                                                                                                    |

|                                                   |          |       |      |                                                                                                                                                                                                                                                                                                                                                                                                                                                                                                                                                                                                                                                                                                |
|---------------------------------------------------|----------|-------|------|------------------------------------------------------------------------------------------------------------------------------------------------------------------------------------------------------------------------------------------------------------------------------------------------------------------------------------------------------------------------------------------------------------------------------------------------------------------------------------------------------------------------------------------------------------------------------------------------------------------------------------------------------------------------------------------------|
| C <sub>17</sub> H <sub>26</sub> O <sub>6</sub> -2 |          | 14.46 | 0.10 |                                                                                                                                                                                                                                                                                                                                                                                                                                                                                                                                                                                                                                                                                                |
| C <sub>17</sub> H <sub>26</sub> O <sub>6</sub> -3 |          | 12.39 | 0.05 |                                                                                                                                                                                                                                                                                                                                                                                                                                                                                                                                                                                                                                                                                                |
| C <sub>17</sub> H <sub>26</sub> O <sub>6</sub> -4 |          | 11.87 | 0.04 |                                                                                                                                                                                                                                                                                                                                                                                                                                                                                                                                                                                                                                                                                                |
| C <sub>17</sub> H <sub>26</sub> O <sub>7</sub> -1 | 341.1602 | 14.09 | 0.77 | 211.1338 (C <sub>12</sub> H <sub>19</sub> O <sub>3</sub> ), 185.0819 (C <sub>9</sub> H <sub>13</sub> O <sub>4</sub> ), 171.1025 (C <sub>9</sub> H <sub>15</sub> O <sub>3</sub> ), 169.0876 (C <sub>9</sub> H <sub>13</sub> O <sub>3</sub> ), 167.0717 (C <sub>9</sub> H <sub>11</sub> O <sub>3</sub> ), 141.0924 (C <sub>8</sub> H <sub>13</sub> O <sub>2</sub> ), 127.0765 (C <sub>7</sub> H <sub>11</sub> O <sub>2</sub> ), 111.0087 (C <sub>5</sub> H <sub>3</sub> O <sub>3</sub> ), 85.0658 (C <sub>5</sub> H <sub>9</sub> O), 85.0297 (C <sub>4</sub> H <sub>5</sub> O <sub>2</sub> ), 69.0346 (C <sub>4</sub> H <sub>5</sub> O), 59.0138 (C <sub>2</sub> H <sub>3</sub> O <sub>2</sub> ) |
| C <sub>17</sub> H <sub>26</sub> O <sub>7</sub> -2 |          | 15.05 | 0.23 | 185.0819 (C <sub>9</sub> H <sub>13</sub> O <sub>4</sub> ), 167.0717 (C <sub>9</sub> H <sub>11</sub> O <sub>3</sub> ), 155.1079 (C <sub>9</sub> H <sub>15</sub> O <sub>2</sub> ), 141.0922 (C <sub>8</sub> H <sub>13</sub> O <sub>2</sub> ), 111.0813 (C <sub>7</sub> H <sub>11</sub> O), 71.0138 (C <sub>3</sub> H <sub>3</sub> O <sub>2</sub> )                                                                                                                                                                                                                                                                                                                                               |
| C <sub>17</sub> H <sub>26</sub> O <sub>7</sub> -3 |          | 13.47 | 0.06 | 185.0819 (C <sub>9</sub> H <sub>13</sub> O <sub>4</sub> ), 171.0659 (C <sub>8</sub> H <sub>11</sub> O <sub>4</sub> ), 169.0872 (C <sub>9</sub> H <sub>13</sub> O <sub>3</sub> ), 127.0764 (C <sub>7</sub> H <sub>11</sub> O <sub>2</sub> ), 111.0813 (C <sub>7</sub> H <sub>11</sub> O), 73.0298 (C <sub>3</sub> H <sub>5</sub> O <sub>2</sub> ), 59.0138 (C <sub>2</sub> H <sub>3</sub> O <sub>2</sub> )                                                                                                                                                                                                                                                                                      |
| C <sub>17</sub> H <sub>26</sub> O <sub>7</sub> -4 |          | 13.17 | 0.17 | 221.1176 (C <sub>13</sub> H <sub>17</sub> O <sub>3</sub> ), 185.0819 (C <sub>9</sub> H <sub>13</sub> O <sub>4</sub> ), 177.1293 (C <sub>12</sub> H <sub>17</sub> O), 171.0659 (C <sub>8</sub> H <sub>11</sub> O <sub>4</sub> ), 141.0924 (C <sub>8</sub> H <sub>13</sub> O <sub>2</sub> ), 127.0765 (C <sub>7</sub> H <sub>11</sub> O <sub>2</sub> ), 84.0454 (C <sub>4</sub> H <sub>7</sub> O <sub>2</sub> ), 71.0142 (C <sub>3</sub> H <sub>3</sub> O <sub>2</sub> ), 59.0141 (C <sub>2</sub> H <sub>3</sub> O <sub>2</sub> )                                                                                                                                                                |
| C <sub>17</sub> H <sub>26</sub> O <sub>7</sub> -5 |          | 16.28 | 0.06 |                                                                                                                                                                                                                                                                                                                                                                                                                                                                                                                                                                                                                                                                                                |
| C <sub>17</sub> H <sub>26</sub> O <sub>8</sub> -1 | 357.1552 | 13.92 | 0.04 | 185.0819 (C <sub>9</sub> H <sub>13</sub> O <sub>4</sub> ), 171.0659 (C <sub>8</sub> H <sub>11</sub> O <sub>4</sub> ), 167.0717 (C <sub>9</sub> H <sub>11</sub> O <sub>3</sub> ), 141.0922 (C <sub>8</sub> H <sub>13</sub> O <sub>2</sub> ), 127.0764 (C <sub>7</sub> H <sub>11</sub> O <sub>2</sub> ), 109.0660 (C <sub>7</sub> H <sub>9</sub> O), 99.0454 (C <sub>5</sub> H <sub>7</sub> O <sub>2</sub> ), 71.0142 (C <sub>3</sub> H <sub>3</sub> O <sub>2</sub> )                                                                                                                                                                                                                            |
| C <sub>17</sub> H <sub>26</sub> O <sub>8</sub> -2 |          | 15.16 | 0.39 | 185.0819 (C <sub>9</sub> H <sub>13</sub> O <sub>4</sub> ), 171.0659 (C <sub>8</sub> H <sub>11</sub> O <sub>4</sub> ), 167.0717 (C <sub>9</sub> H <sub>11</sub> O <sub>3</sub> ), 141.0922 (C <sub>8</sub> H <sub>13</sub> O <sub>2</sub> ), 127.0764 (C <sub>7</sub> H <sub>11</sub> O <sub>2</sub> ), 109.0660 (C <sub>7</sub> H <sub>9</sub> O), 85.0658 (C <sub>5</sub> H <sub>9</sub> O), 59.0138 (C <sub>2</sub> H <sub>3</sub> O <sub>2</sub> )                                                                                                                                                                                                                                          |
| C <sub>17</sub> H <sub>26</sub> O <sub>8</sub> -3 |          | 14.26 | 0.08 | 185.0819 (C <sub>9</sub> H <sub>13</sub> O <sub>4</sub> ), 171.0659 (C <sub>8</sub> H <sub>11</sub> O <sub>4</sub> ), 167.0717 (C <sub>9</sub> H <sub>11</sub> O <sub>3</sub> ), 141.0922 (C <sub>8</sub> H <sub>13</sub> O <sub>2</sub> ), 127.0764 (C <sub>7</sub> H <sub>11</sub> O <sub>2</sub> ), 97.0661 (C <sub>6</sub> H <sub>9</sub> O), 85.0297 (C <sub>4</sub> H <sub>5</sub> O <sub>2</sub> ), 69.0347 (C <sub>4</sub> H <sub>5</sub> O)                                                                                                                                                                                                                                           |
| C <sub>17</sub> H <sub>28</sub> O <sub>5</sub> -1 | 311.1862 | 17.17 | 0.06 |                                                                                                                                                                                                                                                                                                                                                                                                                                                                                                                                                                                                                                                                                                |
| C <sub>17</sub> H <sub>28</sub> O <sub>5</sub> -2 |          | 20.64 | 0.03 |                                                                                                                                                                                                                                                                                                                                                                                                                                                                                                                                                                                                                                                                                                |



|                                                   |          |       |      |                                                                                                                                                                                                                                                                                                                                                                                                                                                                                                                                                                                                                                                                                                                                                                                                                                                                            |
|---------------------------------------------------|----------|-------|------|----------------------------------------------------------------------------------------------------------------------------------------------------------------------------------------------------------------------------------------------------------------------------------------------------------------------------------------------------------------------------------------------------------------------------------------------------------------------------------------------------------------------------------------------------------------------------------------------------------------------------------------------------------------------------------------------------------------------------------------------------------------------------------------------------------------------------------------------------------------------------|
| C <sub>17</sub> H <sub>28</sub> O <sub>5</sub> -3 |          | 15.92 | 0.03 |                                                                                                                                                                                                                                                                                                                                                                                                                                                                                                                                                                                                                                                                                                                                                                                                                                                                            |
| C <sub>17</sub> H <sub>28</sub> O <sub>7</sub> -1 | 343.1759 | 16.37 | 0.23 | 189.0768 (C <sub>8</sub> H <sub>13</sub> O <sub>5</sub> ), 173.0459 (C <sub>7</sub> H <sub>9</sub> O <sub>5</sub> ), 145.0870 (C <sub>7</sub> H <sub>13</sub> O <sub>3</sub> ), 131.0348 (C <sub>5</sub> H <sub>7</sub> O <sub>4</sub> ), 127.0768 (C <sub>7</sub> H <sub>11</sub> O <sub>2</sub> ), 87.0450 (C <sub>4</sub> H <sub>7</sub> O <sub>2</sub> ), 85.0658 (C <sub>3</sub> H <sub>9</sub> O), 69.0347 (C <sub>4</sub> H <sub>5</sub> O), 57.0348 (C <sub>3</sub> H <sub>5</sub> O)                                                                                                                                                                                                                                                                                                                                                                              |
| C <sub>17</sub> H <sub>28</sub> O <sub>7</sub> -2 |          | 13.37 | 0.06 | 185.0819 (C <sub>9</sub> H <sub>13</sub> O <sub>4</sub> ), 171.0659 (C <sub>8</sub> H <sub>11</sub> O <sub>4</sub> ), 141.0922 (C <sub>8</sub> H <sub>13</sub> O <sub>2</sub> ), 127.0764 (C <sub>7</sub> H <sub>11</sub> O <sub>2</sub> ), 123.0812 (C <sub>8</sub> H <sub>11</sub> O), 113.0611 (C <sub>6</sub> H <sub>9</sub> O <sub>2</sub> ), 109.0659 (C <sub>7</sub> H <sub>9</sub> O), 85.0297 (C <sub>4</sub> H <sub>5</sub> O <sub>2</sub> ), 73.0296 (C <sub>3</sub> H <sub>5</sub> O <sub>2</sub> )                                                                                                                                                                                                                                                                                                                                                            |
| C <sub>17</sub> H <sub>28</sub> O <sub>7</sub> -3 |          | 14.52 | 0.07 | 185.0819 (C <sub>9</sub> H <sub>13</sub> O <sub>4</sub> ), 171.0659 (C <sub>8</sub> H <sub>11</sub> O <sub>4</sub> ), 167.0717 (C <sub>9</sub> H <sub>11</sub> O <sub>3</sub> ), 141.0922 (C <sub>8</sub> H <sub>13</sub> O <sub>2</sub> ), 127.0764 (C <sub>7</sub> H <sub>11</sub> O <sub>2</sub> ), 59.0138 (C <sub>2</sub> H <sub>3</sub> O <sub>2</sub> )                                                                                                                                                                                                                                                                                                                                                                                                                                                                                                             |
| C <sub>18</sub> H <sub>26</sub> O <sub>5</sub> -1 | 321.1705 | 17.5  | 0.06 | 209.1552 (C <sub>13</sub> H <sub>21</sub> O <sub>2</sub> ), 177.1285 (C <sub>12</sub> H <sub>17</sub> O), 153.0920 (C <sub>9</sub> H <sub>13</sub> O <sub>2</sub> ), 123.0812 (C <sub>8</sub> H <sub>11</sub> O), 97.0660 (C <sub>6</sub> H <sub>9</sub> O), 69.0345 (C <sub>4</sub> H <sub>5</sub> O)                                                                                                                                                                                                                                                                                                                                                                                                                                                                                                                                                                     |
| C <sub>18</sub> H <sub>26</sub> O <sub>5</sub> -2 |          | 17.79 | 0.07 |                                                                                                                                                                                                                                                                                                                                                                                                                                                                                                                                                                                                                                                                                                                                                                                                                                                                            |
| C <sub>18</sub> H <sub>26</sub> O <sub>6</sub> -1 | 337.1654 | 14.96 | 0.12 | 231.1765 (C <sub>16</sub> H <sub>23</sub> O), 213.0775 (C <sub>10</sub> H <sub>13</sub> O <sub>5</sub> ), 185.0819 (C <sub>9</sub> H <sub>13</sub> O <sub>4</sub> ), 167.0717 (C <sub>9</sub> H <sub>11</sub> O <sub>3</sub> ), 155.0717 (C <sub>8</sub> H <sub>11</sub> O <sub>3</sub> ), 141.0924 (C <sub>8</sub> H <sub>13</sub> O <sub>2</sub> ), 123.0812 (C <sub>8</sub> H <sub>11</sub> O), 59.0138 (C <sub>2</sub> H <sub>3</sub> O <sub>2</sub> )                                                                                                                                                                                                                                                                                                                                                                                                                 |
| C <sub>18</sub> H <sub>26</sub> O <sub>6</sub> -2 |          | 17.32 | 0.29 | 249.1849 (C <sub>16</sub> H <sub>25</sub> O <sub>2</sub> ), 231.1753 (C <sub>16</sub> H <sub>23</sub> O), 213.0768 (C <sub>10</sub> H <sub>13</sub> O <sub>6</sub> ), 211.0977 (C <sub>11</sub> H <sub>15</sub> O <sub>4</sub> ), 195.0662 (C <sub>10</sub> H <sub>11</sub> O <sub>4</sub> ), 169.0870 (C <sub>9</sub> H <sub>13</sub> O <sub>3</sub> ), 163.1127 (C <sub>11</sub> H <sub>15</sub> O), 151.0765 (C <sub>9</sub> H <sub>11</sub> O <sub>2</sub> ), 141.0921 (C <sub>8</sub> H <sub>13</sub> O <sub>2</sub> ), 125.0608 (C <sub>7</sub> H <sub>9</sub> O <sub>2</sub> ), 123.0815 (C <sub>8</sub> H <sub>11</sub> O), 121.06008 (C <sub>8</sub> H <sub>9</sub> O), 109.0660 (C <sub>7</sub> H <sub>9</sub> O), 95.0504 (C <sub>6</sub> H <sub>7</sub> O), 59.0136 (C <sub>2</sub> H <sub>3</sub> O <sub>2</sub> ), 57.0348 (C <sub>3</sub> H <sub>5</sub> O) |
| C <sub>18</sub> H <sub>26</sub> O <sub>6</sub> -3 |          | 17.66 | 0.65 |                                                                                                                                                                                                                                                                                                                                                                                                                                                                                                                                                                                                                                                                                                                                                                                                                                                                            |
| C <sub>18</sub> H <sub>26</sub> O <sub>7</sub> -1 | 353.1604 | 14.56 | 0.32 | 199.0974 (C <sub>10</sub> H <sub>15</sub> O <sub>4</sub> ), 185.0819 (C <sub>9</sub> H <sub>13</sub> O <sub>4</sub> ), 171.1025 (C <sub>9</sub> H <sub>15</sub> O <sub>3</sub> ), 167.0717 (C <sub>9</sub> H <sub>11</sub> O <sub>3</sub> ), 141.0924 (C <sub>8</sub> H <sub>13</sub> O <sub>2</sub> ), 127.0765 (C <sub>7</sub> H <sub>11</sub> O <sub>2</sub> ), 123.0812 (C <sub>8</sub> H <sub>11</sub> O), 85.0297 (C <sub>4</sub> H <sub>5</sub> O <sub>2</sub> ), 73.0296 (C <sub>3</sub> H <sub>5</sub> O <sub>2</sub> )                                                                                                                                                                                                                                                                                                                                           |
| C <sub>18</sub> H <sub>26</sub> O <sub>7</sub> -2 |          | 13.34 | 0.12 | 199.0974 (C <sub>10</sub> H <sub>15</sub> O <sub>4</sub> ), 185.0819 (C <sub>9</sub> H <sub>13</sub> O <sub>4</sub> ), 171.1025 (C <sub>9</sub> H <sub>15</sub> O <sub>3</sub> ), 167.0717 (C <sub>9</sub> H <sub>11</sub> O <sub>3</sub> ), 141.0924 (C <sub>8</sub> H <sub>13</sub> O <sub>2</sub> ), 127.0765 (C <sub>7</sub> H <sub>11</sub> O <sub>2</sub> ), 123.0812 (C <sub>8</sub> H <sub>11</sub> O), 109.0656 (C <sub>7</sub> H <sub>9</sub> O), 85.0297 (C <sub>4</sub> H <sub>5</sub> O <sub>2</sub> ), 73.0296 (C <sub>3</sub> H <sub>5</sub> O <sub>2</sub> )                                                                                                                                                                                                                                                                                               |

|                                                   |          |       |      |                                                                                                                                                                                                                                                                                                                                                                                                                                                                                                                                    |
|---------------------------------------------------|----------|-------|------|------------------------------------------------------------------------------------------------------------------------------------------------------------------------------------------------------------------------------------------------------------------------------------------------------------------------------------------------------------------------------------------------------------------------------------------------------------------------------------------------------------------------------------|
| C <sub>18</sub> H <sub>28</sub> O <sub>4</sub> -1 | 307.1914 | 16.59 | 0.19 | 193.1604 (C <sub>13</sub> H <sub>21</sub> O), 165.1290 (C <sub>11</sub> H <sub>17</sub> O), 141.0922 (C <sub>8</sub> H <sub>13</sub> O <sub>2</sub> ), 123.0812 (C <sub>8</sub> H <sub>11</sub> O), 111.0813 (C <sub>7</sub> H <sub>11</sub> O), 111.0450 (C <sub>8</sub> H <sub>7</sub> O <sub>2</sub> ), 85.0658 (C <sub>5</sub> H <sub>9</sub> O), 83.0503 (C <sub>5</sub> H <sub>7</sub> O), 57.0348 (C <sub>3</sub> H <sub>5</sub> O)                                                                                         |
| C <sub>18</sub> H <sub>28</sub> O <sub>4</sub> -2 |          | 17.04 | 0.12 | 237.1505 (C <sub>14</sub> H <sub>21</sub> O <sub>3</sub> ), 199.1702 (C <sub>12</sub> H <sub>23</sub> O <sub>2</sub> ), 111.0815 (C <sub>7</sub> H <sub>11</sub> O), 85.0661 (C <sub>5</sub> H <sub>9</sub> O), 57.0348 (C <sub>3</sub> H <sub>5</sub> O)                                                                                                                                                                                                                                                                          |
| C <sub>18</sub> H <sub>28</sub> O <sub>5</sub> -1 | 323.1863 | 17.76 | 0.41 | 185.0819 (C <sub>9</sub> H <sub>13</sub> O <sub>4</sub> ), 167.0717 (C <sub>9</sub> H <sub>11</sub> O <sub>3</sub> ), 155.1079 (C <sub>9</sub> H <sub>15</sub> O <sub>2</sub> ), 141.0924 (C <sub>8</sub> H <sub>13</sub> O <sub>2</sub> ), 123.0812 (C <sub>8</sub> H <sub>11</sub> O), 81.0346 (C <sub>5</sub> H <sub>5</sub> O), 69.0345 (C <sub>4</sub> H <sub>5</sub> O), 57.0348 (C <sub>3</sub> H <sub>5</sub> O)                                                                                                           |
| C <sub>18</sub> H <sub>28</sub> O <sub>5</sub> -2 |          | 15.6  | 0.06 | 167.1079 (C <sub>10</sub> H <sub>15</sub> O <sub>2</sub> ), 139.1127 (C <sub>9</sub> H <sub>15</sub> O), 111.0815 (C <sub>7</sub> H <sub>11</sub> O), 85.0661 (C <sub>5</sub> H <sub>9</sub> O), 69.0346 (C <sub>4</sub> H <sub>5</sub> O), 59.0138 (C <sub>2</sub> H <sub>3</sub> O <sub>2</sub> )                                                                                                                                                                                                                                |
| C <sub>18</sub> H <sub>28</sub> O <sub>5</sub> -3 |          | 18.3  | 0.08 |                                                                                                                                                                                                                                                                                                                                                                                                                                                                                                                                    |
| C <sub>18</sub> H <sub>28</sub> O <sub>5</sub> -4 |          | 19.99 | 0.05 |                                                                                                                                                                                                                                                                                                                                                                                                                                                                                                                                    |
| C <sub>18</sub> H <sub>28</sub> O <sub>6</sub> -1 | 339.1813 | 17.97 | 0.17 | 185.0819 (C <sub>9</sub> H <sub>13</sub> O <sub>4</sub> ), 167.0717 (C <sub>9</sub> H <sub>11</sub> O <sub>3</sub> ), 153.0920 (C <sub>9</sub> H <sub>13</sub> O <sub>2</sub> ), 141.0924 (C <sub>8</sub> H <sub>13</sub> O <sub>2</sub> ), 123.0812 (C <sub>8</sub> H <sub>11</sub> O), 71.0139 (C <sub>3</sub> H <sub>3</sub> O <sub>2</sub> ), 57.0348 (C <sub>3</sub> H <sub>5</sub> O)                                                                                                                                        |
| C <sub>18</sub> H <sub>28</sub> O <sub>6</sub> -2 |          | 15.82 | 0.16 | 215.0926 (C <sub>10</sub> H <sub>15</sub> O <sub>5</sub> ), 199.0974 (C <sub>10</sub> H <sub>15</sub> O <sub>4</sub> ), 185.0819 (C <sub>9</sub> H <sub>13</sub> O <sub>4</sub> ), 181.0870 (C <sub>10</sub> H <sub>13</sub> O <sub>3</sub> ), 157.0870 (C <sub>8</sub> H <sub>13</sub> O <sub>3</sub> ), 141.0924 (C <sub>8</sub> H <sub>13</sub> O <sub>2</sub> ), 123.0812 (C <sub>8</sub> H <sub>11</sub> O), 85.0297 (C <sub>4</sub> H <sub>5</sub> O <sub>2</sub> ), 73.0296 (C <sub>3</sub> H <sub>5</sub> O <sub>2</sub> ) |
| C <sub>18</sub> H <sub>28</sub> O <sub>6</sub> -3 |          | 15.29 | 0.17 |                                                                                                                                                                                                                                                                                                                                                                                                                                                                                                                                    |
| C <sub>18</sub> H <sub>28</sub> O <sub>6</sub> -4 |          | 14.12 | 0.11 |                                                                                                                                                                                                                                                                                                                                                                                                                                                                                                                                    |
| C <sub>18</sub> H <sub>28</sub> O <sub>6</sub> -5 |          | 16.99 | 0.04 |                                                                                                                                                                                                                                                                                                                                                                                                                                                                                                                                    |
| C <sub>18</sub> H <sub>28</sub> O <sub>6</sub> -6 |          | 18.72 | 0.01 |                                                                                                                                                                                                                                                                                                                                                                                                                                                                                                                                    |
| C <sub>18</sub> H <sub>28</sub> O <sub>7</sub> -1 | 355.1761 | 14.5  | 1.19 | 199.0974 (C <sub>10</sub> H <sub>15</sub> O <sub>4</sub> ), 185.0819 (C <sub>9</sub> H <sub>13</sub> O <sub>4</sub> ), 167.0717 (C <sub>9</sub> H <sub>11</sub> O <sub>3</sub> ), 141.0924 (C <sub>8</sub> H <sub>13</sub> O <sub>2</sub> ), 111.0813 (C <sub>7</sub> H <sub>11</sub> O), 99.0450 (C <sub>5</sub> H <sub>7</sub> O <sub>2</sub> ), 71.0139 (C <sub>3</sub> H <sub>3</sub> O <sub>2</sub> ), 57.0348 (C <sub>3</sub> H <sub>5</sub> O)                                                                              |
| C <sub>18</sub> H <sub>28</sub> O <sub>7</sub> -2 |          | 14.68 | 0.23 | 199.0974 (C <sub>10</sub> H <sub>15</sub> O <sub>4</sub> ), 185.0819 (C <sub>9</sub> H <sub>13</sub> O <sub>4</sub> ), 181.0870 (C <sub>10</sub> H <sub>13</sub> O <sub>3</sub> ), 167.0717 (C <sub>9</sub> H <sub>11</sub> O <sub>3</sub> ), 155.0717 (C <sub>8</sub> H <sub>11</sub> O <sub>3</sub> ), 141.0924 (C <sub>8</sub> H <sub>13</sub> O <sub>2</sub> ), 123.0812 (C <sub>8</sub> H <sub>11</sub> O),                                                                                                                   |

|                                                   |          |       |      |                                                                                                                                                                                                                                                                                                                                                                                                                                                                                                                                                                                                                                                                     |
|---------------------------------------------------|----------|-------|------|---------------------------------------------------------------------------------------------------------------------------------------------------------------------------------------------------------------------------------------------------------------------------------------------------------------------------------------------------------------------------------------------------------------------------------------------------------------------------------------------------------------------------------------------------------------------------------------------------------------------------------------------------------------------|
|                                                   |          |       |      | 111.0813 (C <sub>7</sub> H <sub>11</sub> O), 109.0657 (C <sub>7</sub> H <sub>9</sub> O), 85.0297 (C <sub>4</sub> H <sub>5</sub> O <sub>2</sub> ), 73.0295 (C <sub>3</sub> H <sub>5</sub> O <sub>2</sub> )                                                                                                                                                                                                                                                                                                                                                                                                                                                           |
| C <sub>18</sub> H <sub>28</sub> O <sub>7</sub> -3 |          | 16.01 | 0.11 | 237.1132 (C <sub>13</sub> H <sub>17</sub> O <sub>4</sub> ), 215.0922 (C <sub>10</sub> H <sub>15</sub> O <sub>5</sub> ), 185.0819 (C <sub>9</sub> H <sub>13</sub> O <sub>4</sub> ), 167.0717 (C <sub>9</sub> H <sub>11</sub> O <sub>3</sub> ), 141.0924 (C <sub>8</sub> H <sub>13</sub> O <sub>2</sub> ), 137.0968 (C <sub>9</sub> H <sub>13</sub> O), 123.0812 (C <sub>8</sub> H <sub>11</sub> O), 111.0455 (C <sub>6</sub> H <sub>7</sub> O <sub>2</sub> ), 97.0656 (C <sub>6</sub> H <sub>9</sub> O), 81.0347 (C <sub>5</sub> H <sub>5</sub> O), 71.0140 (C <sub>3</sub> H <sub>3</sub> O <sub>2</sub> ), 59.0138 (C <sub>2</sub> H <sub>3</sub> O <sub>2</sub> ) |
| C <sub>18</sub> H <sub>28</sub> O <sub>7</sub> -4 |          | 15.29 | 0.13 |                                                                                                                                                                                                                                                                                                                                                                                                                                                                                                                                                                                                                                                                     |
| C <sub>18</sub> H <sub>28</sub> O <sub>7</sub> -5 |          | 14.84 | 0.09 |                                                                                                                                                                                                                                                                                                                                                                                                                                                                                                                                                                                                                                                                     |
| C <sub>18</sub> H <sub>30</sub> O <sub>4</sub> -1 | 309.2071 | 21.48 | 0.03 | 169.1238 (C <sub>10</sub> H <sub>17</sub> O <sub>2</sub> ), 151.1130 (C <sub>10</sub> H <sub>15</sub> O)                                                                                                                                                                                                                                                                                                                                                                                                                                                                                                                                                            |
| C <sub>18</sub> H <sub>30</sub> O <sub>4</sub> -2 |          | 21.07 | 0.03 |                                                                                                                                                                                                                                                                                                                                                                                                                                                                                                                                                                                                                                                                     |
| C <sub>18</sub> H <sub>30</sub> O <sub>4</sub> -3 |          | 16.81 | 0.01 |                                                                                                                                                                                                                                                                                                                                                                                                                                                                                                                                                                                                                                                                     |
| C <sub>18</sub> H <sub>30</sub> O <sub>4</sub> -4 |          | 17.41 | 0.02 |                                                                                                                                                                                                                                                                                                                                                                                                                                                                                                                                                                                                                                                                     |
| C <sub>18</sub> H <sub>30</sub> O <sub>5</sub> -1 | 325.2014 | 15.9  | 0.06 |                                                                                                                                                                                                                                                                                                                                                                                                                                                                                                                                                                                                                                                                     |
| C <sub>18</sub> H <sub>30</sub> O <sub>5</sub> -2 |          | 17.4  | 0.03 |                                                                                                                                                                                                                                                                                                                                                                                                                                                                                                                                                                                                                                                                     |
| C <sub>18</sub> H <sub>30</sub> O <sub>5</sub> -3 |          | 16.67 | 0.04 |                                                                                                                                                                                                                                                                                                                                                                                                                                                                                                                                                                                                                                                                     |
| C <sub>18</sub> H <sub>30</sub> O <sub>7</sub> -1 | 357.1916 | 19.99 | 0.11 | 189.0768 (C <sub>8</sub> H <sub>13</sub> O <sub>5</sub> ), 171.0659 (C <sub>8</sub> H <sub>11</sub> O <sub>4</sub> ), 169.1238 (C <sub>10</sub> H <sub>17</sub> O <sub>2</sub> ), 145.0870 (C <sub>7</sub> H <sub>13</sub> O <sub>3</sub> ), 85.0659 (C <sub>5</sub> H <sub>9</sub> O)                                                                                                                                                                                                                                                                                                                                                                              |
| C <sub>18</sub> H <sub>30</sub> O <sub>7</sub> -2 |          | 19.32 | 0.08 | 189.0768 (C <sub>8</sub> H <sub>13</sub> O <sub>5</sub> ), 171.0659 (C <sub>8</sub> H <sub>11</sub> O <sub>4</sub> ), 169.1238 (C <sub>10</sub> H <sub>17</sub> O <sub>2</sub> ), 151.1129 (C <sub>10</sub> H <sub>15</sub> O), 145.0870 (C <sub>7</sub> H <sub>13</sub> O <sub>3</sub> ), 131.0349 (C <sub>5</sub> H <sub>7</sub> O <sub>4</sub> ), 127.0765 (C <sub>7</sub> H <sub>11</sub> O <sub>2</sub> ), 101.0972 (C <sub>6</sub> H <sub>13</sub> O), 87.0453 (C <sub>4</sub> H <sub>7</sub> O <sub>2</sub> ), 85.0659 (C <sub>5</sub> H <sub>9</sub> O), 69.0346 (C <sub>4</sub> H <sub>5</sub> O), 57.0348 (C <sub>3</sub> H <sub>5</sub> O)               |
| C <sub>18</sub> H <sub>30</sub> O <sub>8</sub> -1 | 373.1865 | 14.06 | 0.93 |                                                                                                                                                                                                                                                                                                                                                                                                                                                                                                                                                                                                                                                                     |
| C <sub>18</sub> H <sub>30</sub> O <sub>8</sub> -2 |          | 15.05 | 0.04 |                                                                                                                                                                                                                                                                                                                                                                                                                                                                                                                                                                                                                                                                     |
| C <sub>18</sub> H <sub>30</sub> O <sub>8</sub> -3 |          | 16.31 | 0.03 |                                                                                                                                                                                                                                                                                                                                                                                                                                                                                                                                                                                                                                                                     |
| C <sub>18</sub> H <sub>30</sub> O <sub>8</sub> -4 |          | 18.07 | 0.01 |                                                                                                                                                                                                                                                                                                                                                                                                                                                                                                                                                                                                                                                                     |
| C <sub>18</sub> H <sub>30</sub> O <sub>9</sub> -1 | 389.1816 | 16.69 | 0.15 | 189.0768 (C <sub>8</sub> H <sub>13</sub> O <sub>5</sub> ), 171.0659 (C <sub>8</sub> H <sub>11</sub> O <sub>4</sub> ), 145.0870 (C <sub>7</sub> H <sub>13</sub> O <sub>3</sub> ), 127.0764 (C <sub>7</sub> H <sub>11</sub> O <sub>2</sub> ), 125.0612 (C <sub>7</sub> H <sub>9</sub> O <sub>2</sub> ),                                                                                                                                                                                                                                                                                                                                                               |

|                                                   |          |       |      |                                                                                                                                                                                                                                                                                                                                                                                                                                                                                                                                                                                                                                           |
|---------------------------------------------------|----------|-------|------|-------------------------------------------------------------------------------------------------------------------------------------------------------------------------------------------------------------------------------------------------------------------------------------------------------------------------------------------------------------------------------------------------------------------------------------------------------------------------------------------------------------------------------------------------------------------------------------------------------------------------------------------|
| C <sub>18</sub> H <sub>30</sub> O <sub>9</sub> -2 |          | 17.65 | 0.01 | 107.0502 (C <sub>7</sub> H <sub>7</sub> O), 85.0658 (C <sub>5</sub> H <sub>9</sub> O), 57.0348 (C <sub>3</sub> H <sub>5</sub> O)                                                                                                                                                                                                                                                                                                                                                                                                                                                                                                          |
| C <sub>19</sub> H <sub>28</sub> O <sub>6</sub> -1 | 351.1811 | 16.1  | 0.70 | 199.0974 (C <sub>10</sub> H <sub>15</sub> O <sub>4</sub> ), 185.0819 (C <sub>9</sub> H <sub>13</sub> O <sub>4</sub> ), 169.0872 (C <sub>9</sub> H <sub>13</sub> O <sub>3</sub> ), 167.0717 (C <sub>9</sub> H <sub>11</sub> O <sub>3</sub> ), 141.0924 (C <sub>8</sub> H <sub>13</sub> O <sub>2</sub> ), 125.0972 (C <sub>8</sub> H <sub>13</sub> O), 123.0812 (C <sub>8</sub> H <sub>11</sub> O), 101.0608 (C <sub>5</sub> H <sub>9</sub> O <sub>2</sub> ), 85.0294 (C <sub>4</sub> H <sub>5</sub> O <sub>2</sub> ), 69.0347 (C <sub>4</sub> H <sub>5</sub> O), 57.0348 (C <sub>3</sub> H <sub>5</sub> O)                                 |
| C <sub>19</sub> H <sub>28</sub> O <sub>6</sub> -2 |          | 17.28 | 0.09 | 195.0668 (C <sub>10</sub> H <sub>11</sub> O <sub>4</sub> ), 185.0819 (C <sub>9</sub> H <sub>13</sub> O <sub>4</sub> ), 167.0717 (C <sub>9</sub> H <sub>11</sub> O <sub>3</sub> ), 141.0924 (C <sub>8</sub> H <sub>13</sub> O <sub>2</sub> ), 123.0812 (C <sub>8</sub> H <sub>11</sub> O), 107.0504 (C <sub>7</sub> H <sub>7</sub> O), 85.0298 (C <sub>4</sub> H <sub>5</sub> O <sub>2</sub> ), 57.0348 (C <sub>3</sub> H <sub>5</sub> O)                                                                                                                                                                                                  |
| C <sub>19</sub> H <sub>28</sub> O <sub>6</sub> -3 |          | 17.72 | 0.10 | 185.0819 (C <sub>9</sub> H <sub>13</sub> O <sub>4</sub> ), 167.0717 (C <sub>9</sub> H <sub>11</sub> O <sub>3</sub> ), 141.0924 (C <sub>8</sub> H <sub>13</sub> O <sub>2</sub> ), 123.0812 (C <sub>8</sub> H <sub>11</sub> O)                                                                                                                                                                                                                                                                                                                                                                                                              |
| C <sub>19</sub> H <sub>28</sub> O <sub>6</sub> -4 |          | 15.56 | 0.11 | 185.0819 (C <sub>9</sub> H <sub>13</sub> O <sub>4</sub> ), 183.1027 (C <sub>10</sub> H <sub>15</sub> O <sub>3</sub> ), 169.0872 (C <sub>9</sub> H <sub>13</sub> O <sub>3</sub> ), 167.0717 (C <sub>9</sub> H <sub>11</sub> O <sub>3</sub> ), 141.0924 (C <sub>8</sub> H <sub>13</sub> O <sub>2</sub> ), 125.0972 (C <sub>8</sub> H <sub>13</sub> O), 123.0812 (C <sub>8</sub> H <sub>11</sub> O), 113.0610 (C <sub>6</sub> H <sub>9</sub> O <sub>2</sub> ), 59.0141 (C <sub>2</sub> H <sub>3</sub> O <sub>2</sub> ), 57.0348 (C <sub>3</sub> H <sub>5</sub> O)                                                                            |
| C <sub>19</sub> H <sub>28</sub> O <sub>7</sub> -1 | 367.1760 | 15.88 | 4.80 | 199.0974 (C <sub>10</sub> H <sub>15</sub> O <sub>4</sub> ), 185.0819 (C <sub>9</sub> H <sub>13</sub> O <sub>4</sub> ), 167.0717 (C <sub>9</sub> H <sub>11</sub> O <sub>3</sub> ), 141.0924 (C <sub>8</sub> H <sub>13</sub> O <sub>2</sub> ), 123.0812 (C <sub>8</sub> H <sub>11</sub> O), 99.0450 (C <sub>5</sub> H <sub>7</sub> O <sub>2</sub> ), 71.0139 (C <sub>3</sub> H <sub>3</sub> O <sub>2</sub> )                                                                                                                                                                                                                                |
| C <sub>19</sub> H <sub>28</sub> O <sub>7</sub> -2 |          | 15.18 | 0.24 | 199.0974 (C <sub>10</sub> H <sub>15</sub> O <sub>4</sub> ), 185.0819 (C <sub>9</sub> H <sub>13</sub> O <sub>4</sub> ), 167.0717 (C <sub>9</sub> H <sub>11</sub> O <sub>3</sub> ), 141.0924 (C <sub>8</sub> H <sub>13</sub> O <sub>2</sub> ), 123.0812 (C <sub>8</sub> H <sub>11</sub> O), 71.0139 (C <sub>3</sub> H <sub>3</sub> O <sub>2</sub> ), 57.0348 (C <sub>3</sub> H <sub>5</sub> O)                                                                                                                                                                                                                                              |
| C <sub>19</sub> H <sub>28</sub> O <sub>7</sub> -3 |          | 17.02 | 0.11 | 199.0974 (C <sub>10</sub> H <sub>15</sub> O <sub>4</sub> ), 185.0819 (C <sub>9</sub> H <sub>13</sub> O <sub>4</sub> ), 171.1025 (C <sub>9</sub> H <sub>15</sub> O <sub>3</sub> ), 167.0717 (C <sub>9</sub> H <sub>11</sub> O <sub>3</sub> ), 157.0870 (C <sub>8</sub> H <sub>13</sub> O <sub>3</sub> ), 141.0924 (C <sub>8</sub> H <sub>13</sub> O <sub>2</sub> ), 123.0812 (C <sub>8</sub> H <sub>11</sub> O), 85.0297 (C <sub>4</sub> H <sub>5</sub> O <sub>2</sub> ), 59.0141 (C <sub>2</sub> H <sub>3</sub> O <sub>2</sub> )                                                                                                          |
| C <sub>19</sub> H <sub>28</sub> O <sub>7</sub> -4 |          | 17.15 | 0.10 | 199.0974 (C <sub>10</sub> H <sub>15</sub> O <sub>4</sub> ), 185.0819 (C <sub>9</sub> H <sub>13</sub> O <sub>4</sub> ), 181.0870 (C <sub>10</sub> H <sub>13</sub> O <sub>3</sub> ), 169.0876 (C <sub>9</sub> H <sub>13</sub> O <sub>3</sub> ), 167.0717 (C <sub>9</sub> H <sub>11</sub> O <sub>3</sub> ), 157.0867 (C <sub>8</sub> H <sub>13</sub> O <sub>3</sub> ), 139.0763 (C <sub>8</sub> H <sub>11</sub> O <sub>2</sub> ), 137.0970 (C <sub>9</sub> H <sub>13</sub> O), 123.0820 (C <sub>8</sub> H <sub>11</sub> O), 73.0296 (C <sub>3</sub> H <sub>5</sub> O <sub>2</sub> ), 59.0141 (C <sub>2</sub> H <sub>3</sub> O <sub>2</sub> ) |
| C <sub>19</sub> H <sub>28</sub> O <sub>7</sub> -5 |          | 15.36 | 0.15 | 199.0974 (C <sub>10</sub> H <sub>15</sub> O <sub>4</sub> ), 185.0819 (C <sub>9</sub> H <sub>13</sub> O <sub>4</sub> ), 167.0717 (C <sub>9</sub> H <sub>11</sub> O <sub>3</sub> ), 153.0916 (C <sub>9</sub> H <sub>13</sub> O <sub>2</sub> ), 141.0924 (C <sub>8</sub> H <sub>13</sub> O <sub>2</sub> ),                                                                                                                                                                                                                                                                                                                                   |

|                                                   |          |       |      |                                                                                                                                                                                                                                                                                                                                                                                                                                                                                                                                                                                                                                                                                                                                                                                                                                       |
|---------------------------------------------------|----------|-------|------|---------------------------------------------------------------------------------------------------------------------------------------------------------------------------------------------------------------------------------------------------------------------------------------------------------------------------------------------------------------------------------------------------------------------------------------------------------------------------------------------------------------------------------------------------------------------------------------------------------------------------------------------------------------------------------------------------------------------------------------------------------------------------------------------------------------------------------------|
|                                                   |          |       |      | 137.0968 (C <sub>9</sub> H <sub>13</sub> O), 99.0454 (C <sub>5</sub> H <sub>7</sub> O <sub>2</sub> ), 57.0348 (C <sub>3</sub> H <sub>5</sub> O)                                                                                                                                                                                                                                                                                                                                                                                                                                                                                                                                                                                                                                                                                       |
| C <sub>19</sub> H <sub>30</sub> O <sub>5</sub> -1 | 337.2019 | 15.36 | 1.53 | 213.1133 (C <sub>11</sub> H <sub>17</sub> O <sub>4</sub> ), 195.1027 (C <sub>11</sub> H <sub>15</sub> O <sub>3</sub> ), 183.1026 (C <sub>10</sub> H <sub>15</sub> O <sub>3</sub> ), 169.0868 (C <sub>9</sub> H <sub>13</sub> O <sub>3</sub> ), 167.1080 (C <sub>10</sub> H <sub>15</sub> O <sub>2</sub> ), 153.0919 (C <sub>9</sub> H <sub>13</sub> O <sub>2</sub> ), 141.0920 (C <sub>8</sub> H <sub>13</sub> O <sub>2</sub> ), 125.0972 (C <sub>8</sub> H <sub>13</sub> O), 123.0812 (C <sub>8</sub> H <sub>11</sub> O), 97.0295 (C <sub>5</sub> H <sub>5</sub> O <sub>2</sub> ), 85.0658 (C <sub>5</sub> H <sub>9</sub> O), 71.0139 (C <sub>3</sub> H <sub>3</sub> O <sub>2</sub> ), 69.0346 (C <sub>4</sub> H <sub>5</sub> O), 59.0136 (C <sub>2</sub> H <sub>3</sub> O <sub>2</sub> ), 57.0348 (C <sub>3</sub> H <sub>5</sub> O) |
| C <sub>19</sub> H <sub>30</sub> O <sub>5</sub> -2 |          | 20.24 | 0.12 | 185.0819 (C <sub>9</sub> H <sub>13</sub> O <sub>4</sub> ), 169.1234 (C <sub>10</sub> H <sub>17</sub> O <sub>2</sub> ), 167.0717 (C <sub>9</sub> H <sub>11</sub> O <sub>3</sub> ), 151.1123 (C <sub>10</sub> H <sub>15</sub> O), 141.0924 (C <sub>8</sub> H <sub>13</sub> O <sub>2</sub> ), 123.0812 (C <sub>8</sub> H <sub>11</sub> O), 81.0347 (C <sub>5</sub> H <sub>5</sub> O)                                                                                                                                                                                                                                                                                                                                                                                                                                                     |
| C <sub>19</sub> H <sub>30</sub> O <sub>5</sub> -3 |          | 21.05 | 0.04 | 185.0819 (C <sub>9</sub> H <sub>13</sub> O <sub>4</sub> ), 167.0717 (C <sub>9</sub> H <sub>11</sub> O <sub>3</sub> ), 153.0928 (C <sub>9</sub> H <sub>13</sub> O <sub>2</sub> ), 141.0924 (C <sub>8</sub> H <sub>13</sub> O <sub>2</sub> ), 123.0812 (C <sub>8</sub> H <sub>11</sub> O)                                                                                                                                                                                                                                                                                                                                                                                                                                                                                                                                               |
| C <sub>19</sub> H <sub>30</sub> O <sub>5</sub> -4 |          | 15.57 | 0.50 |                                                                                                                                                                                                                                                                                                                                                                                                                                                                                                                                                                                                                                                                                                                                                                                                                                       |
| C <sub>19</sub> H <sub>30</sub> O <sub>5</sub> -5 |          | 20.08 | 0.06 |                                                                                                                                                                                                                                                                                                                                                                                                                                                                                                                                                                                                                                                                                                                                                                                                                                       |
| C <sub>19</sub> H <sub>30</sub> O <sub>5</sub> -6 |          | 16.67 | 0.08 |                                                                                                                                                                                                                                                                                                                                                                                                                                                                                                                                                                                                                                                                                                                                                                                                                                       |
| C <sub>19</sub> H <sub>30</sub> O <sub>6</sub> -1 | 353.1968 | 16.21 | 0.37 | 185.0819 (C <sub>9</sub> H <sub>13</sub> O <sub>4</sub> ), 167.0717 (C <sub>9</sub> H <sub>11</sub> O <sub>3</sub> ), 141.0924 (C <sub>8</sub> H <sub>13</sub> O <sub>2</sub> ), 123.0812 (C <sub>8</sub> H <sub>11</sub> O), 109.0658 (C <sub>7</sub> H <sub>9</sub> O), 81.0346 (C <sub>5</sub> H <sub>5</sub> O), 57.0348 (C <sub>3</sub> H <sub>5</sub> O)                                                                                                                                                                                                                                                                                                                                                                                                                                                                        |
| C <sub>19</sub> H <sub>30</sub> O <sub>6</sub> -2 |          | 16.5  | 0.07 | 185.0819 (C <sub>9</sub> H <sub>13</sub> O <sub>4</sub> ), 167.0717 (C <sub>9</sub> H <sub>11</sub> O <sub>3</sub> ), 141.0924 (C <sub>8</sub> H <sub>13</sub> O <sub>2</sub> ), 123.0812 (C <sub>8</sub> H <sub>11</sub> O), 59.0138 (C <sub>2</sub> H <sub>3</sub> O <sub>2</sub> )                                                                                                                                                                                                                                                                                                                                                                                                                                                                                                                                                 |
| C <sub>19</sub> H <sub>30</sub> O <sub>6</sub> -3 |          | 17.86 | 0.17 | 185.1181 (C <sub>10</sub> H <sub>17</sub> O <sub>3</sub> ), 167.0717 (C <sub>9</sub> H <sub>11</sub> O <sub>3</sub> ), 141.0924 (C <sub>8</sub> H <sub>13</sub> O <sub>2</sub> ), 123.0812 (C <sub>8</sub> H <sub>11</sub> O)                                                                                                                                                                                                                                                                                                                                                                                                                                                                                                                                                                                                         |
| C <sub>19</sub> H <sub>30</sub> O <sub>6</sub> -4 |          | 16.64 | 0.27 | 223.1136 (C <sub>13</sub> H <sub>19</sub> O <sub>3</sub> ), 213.0761 (C <sub>10</sub> H <sub>13</sub> O <sub>5</sub> ), 185.0819 (C <sub>9</sub> H <sub>13</sub> O <sub>4</sub> ), 167.0717 (C <sub>9</sub> H <sub>11</sub> O <sub>3</sub> ), 141.0924 (C <sub>8</sub> H <sub>13</sub> O <sub>2</sub> ), 139.1130 (C <sub>9</sub> H <sub>15</sub> O), 123.0812 (C <sub>8</sub> H <sub>11</sub> O), 59.0138 (C <sub>2</sub> H <sub>3</sub> O <sub>2</sub> ), 57.0348 (C <sub>3</sub> H <sub>5</sub> O)                                                                                                                                                                                                                                                                                                                                 |
| C <sub>19</sub> H <sub>30</sub> O <sub>6</sub> -5 |          | 15.27 | 0.08 | 185.0819 (C <sub>9</sub> H <sub>13</sub> O <sub>4</sub> ), 167.0717 (C <sub>9</sub> H <sub>11</sub> O <sub>3</sub> ), 141.0924 (C <sub>8</sub> H <sub>13</sub> O <sub>2</sub> ), 123.0812 (C <sub>8</sub> H <sub>11</sub> O), 109.0658 (C <sub>7</sub> H <sub>9</sub> O), 71.0141 (C <sub>3</sub> H <sub>3</sub> O <sub>2</sub> )                                                                                                                                                                                                                                                                                                                                                                                                                                                                                                     |
| C <sub>19</sub> H <sub>30</sub> O <sub>6</sub> -6 |          | 20.11 | 0.06 |                                                                                                                                                                                                                                                                                                                                                                                                                                                                                                                                                                                                                                                                                                                                                                                                                                       |
| C <sub>19</sub> H <sub>30</sub> O <sub>6</sub> -7 |          | 15.93 | 0.05 |                                                                                                                                                                                                                                                                                                                                                                                                                                                                                                                                                                                                                                                                                                                                                                                                                                       |

|                                                    |          |       |      |                                                                                                                                                                                                                                                                                                                                                                                                                                                                                                                                                                                           |
|----------------------------------------------------|----------|-------|------|-------------------------------------------------------------------------------------------------------------------------------------------------------------------------------------------------------------------------------------------------------------------------------------------------------------------------------------------------------------------------------------------------------------------------------------------------------------------------------------------------------------------------------------------------------------------------------------------|
| C <sub>19</sub> H <sub>30</sub> O <sub>7</sub> -1  | 369.1918 | 16.95 | 0.50 | 185.0819 (C <sub>9</sub> H <sub>13</sub> O <sub>4</sub> ), 167.0717 (C <sub>9</sub> H <sub>11</sub> O <sub>3</sub> ), 141.0924 (C <sub>8</sub> H <sub>13</sub> O <sub>2</sub> ), 123.0812 (C <sub>8</sub> H <sub>11</sub> O), 99.0454 (C <sub>5</sub> H <sub>7</sub> O <sub>2</sub> ), 71.0138 (C <sub>3</sub> H <sub>3</sub> O <sub>2</sub> )                                                                                                                                                                                                                                            |
| C <sub>19</sub> H <sub>30</sub> O <sub>7</sub> -2  |          | 14.74 | 0.25 | 211.0965 (C <sub>11</sub> H <sub>15</sub> O <sub>4</sub> ), 185.0819 (C <sub>9</sub> H <sub>13</sub> O <sub>4</sub> ), 141.0924 (C <sub>8</sub> H <sub>13</sub> O <sub>2</sub> )                                                                                                                                                                                                                                                                                                                                                                                                          |
| C <sub>19</sub> H <sub>30</sub> O <sub>7</sub> -3  |          | 18.64 | 0.06 | 185.0819 (C <sub>9</sub> H <sub>13</sub> O <sub>4</sub> ), 167.0717 (C <sub>9</sub> H <sub>11</sub> O <sub>3</sub> ), 141.0924 (C <sub>8</sub> H <sub>13</sub> O <sub>2</sub> ), 123.0812 (C <sub>8</sub> H <sub>11</sub> O), 87.0451 (C <sub>4</sub> H <sub>7</sub> O <sub>2</sub> ), 71.0138 (C <sub>3</sub> H <sub>3</sub> O <sub>2</sub> ), 59.0138 (C <sub>2</sub> H <sub>3</sub> O <sub>2</sub> )                                                                                                                                                                                   |
| C <sub>19</sub> H <sub>30</sub> O <sub>7</sub> -4  |          | 17.26 | 0.06 | 185.0819 (C <sub>9</sub> H <sub>13</sub> O <sub>4</sub> ), 167.0717 (C <sub>9</sub> H <sub>11</sub> O <sub>3</sub> ), 141.0924 (C <sub>8</sub> H <sub>13</sub> O <sub>2</sub> ), 123.0812 (C <sub>8</sub> H <sub>11</sub> O)                                                                                                                                                                                                                                                                                                                                                              |
| C <sub>19</sub> H <sub>30</sub> O <sub>8</sub> -11 | 385.1865 | 13.08 | 0.16 | 241.1080 (C <sub>12</sub> H <sub>17</sub> O <sub>5</sub> ), 213.1143 (C <sub>11</sub> H <sub>17</sub> O <sub>4</sub> ), 199.0974 (C <sub>10</sub> H <sub>15</sub> O <sub>4</sub> ), 185.0819 (C <sub>9</sub> H <sub>13</sub> O <sub>4</sub> ), 167.0717 (C <sub>9</sub> H <sub>11</sub> O <sub>3</sub> ), 141.0924 (C <sub>8</sub> H <sub>13</sub> O <sub>2</sub> ), 123.0812 (C <sub>8</sub> H <sub>11</sub> O), 85.0297 (C <sub>4</sub> H <sub>5</sub> O <sub>2</sub> ), 73.0296 (C <sub>3</sub> H <sub>5</sub> O <sub>2</sub> )                                                        |
| C <sub>19</sub> H <sub>30</sub> O <sub>8</sub> -2  |          | 13.88 | 0.14 | 213.0767 (C <sub>10</sub> H <sub>13</sub> O <sub>5</sub> ), 185.0819 (C <sub>9</sub> H <sub>13</sub> O <sub>4</sub> ), 141.0924 (C <sub>8</sub> H <sub>13</sub> O <sub>2</sub> )                                                                                                                                                                                                                                                                                                                                                                                                          |
| C <sub>19</sub> H <sub>30</sub> O <sub>8</sub> -3  |          | 14.91 | 0.13 | 267.1246 (C <sub>14</sub> H <sub>19</sub> O <sub>5</sub> ), 197.0819 (C <sub>10</sub> H <sub>13</sub> O <sub>4</sub> ), 185.0819 (C <sub>9</sub> H <sub>13</sub> O <sub>4</sub> ), 153.0916 (C <sub>9</sub> H <sub>13</sub> O <sub>2</sub> ), 141.0924 (C <sub>8</sub> H <sub>13</sub> O <sub>2</sub> ), 123.0812 (C <sub>8</sub> H <sub>11</sub> O), 95.0503 (C <sub>6</sub> H <sub>7</sub> O), 81.0349 (C <sub>5</sub> H <sub>5</sub> O), 69.0345 (C <sub>4</sub> H <sub>5</sub> O), 59.0138 (C <sub>2</sub> H <sub>3</sub> O <sub>2</sub> ), 57.0348 (C <sub>3</sub> H <sub>5</sub> O) |
| C <sub>19</sub> H <sub>30</sub> O <sub>8</sub> -4  |          | 14.82 | 0.09 | 267.1246 (C <sub>14</sub> H <sub>19</sub> O <sub>5</sub> ), 197.0819 (C <sub>10</sub> H <sub>13</sub> O <sub>4</sub> ), 185.0819 (C <sub>9</sub> H <sub>13</sub> O <sub>4</sub> ), 153.0916 (C <sub>9</sub> H <sub>13</sub> O <sub>2</sub> ), 123.0812 (C <sub>8</sub> H <sub>11</sub> O), 69.0345 (C <sub>4</sub> H <sub>5</sub> O), 59.0138 (C <sub>2</sub> H <sub>3</sub> O <sub>2</sub> )                                                                                                                                                                                             |
| C <sub>19</sub> H <sub>30</sub> O <sub>8</sub> -5  |          | 15.96 | 0.09 | 215.0926 (C <sub>10</sub> H <sub>15</sub> O <sub>5</sub> ), 185.0819 (C <sub>9</sub> H <sub>13</sub> O <sub>4</sub> ), 169.0872 (C <sub>9</sub> H <sub>13</sub> O <sub>3</sub> ), 167.0717 (C <sub>9</sub> H <sub>11</sub> O <sub>3</sub> ), 141.0924 (C <sub>8</sub> H <sub>13</sub> O <sub>2</sub> ), 123.0812 (C <sub>8</sub> H <sub>11</sub> O), 99.0454 (C <sub>5</sub> H <sub>7</sub> O <sub>2</sub> ), 59.0138 (C <sub>2</sub> H <sub>3</sub> O <sub>2</sub> )                                                                                                                     |
| C <sub>19</sub> H <sub>30</sub> O <sub>8</sub> -6  |          | 15.19 | 0.17 |                                                                                                                                                                                                                                                                                                                                                                                                                                                                                                                                                                                           |
| C <sub>19</sub> H <sub>28</sub> O <sub>9</sub> -1  | 399.1660 | 14.06 | 0.13 | 185.0819 (C <sub>9</sub> H <sub>13</sub> O <sub>4</sub> ), 141.0924 (C <sub>8</sub> H <sub>13</sub> O <sub>2</sub> )                                                                                                                                                                                                                                                                                                                                                                                                                                                                      |
| C <sub>19</sub> H <sub>28</sub> O <sub>9</sub> -2  |          | 14.19 | 0.10 | 185.0819 (C <sub>9</sub> H <sub>13</sub> O <sub>4</sub> ), 167.0717 (C <sub>9</sub> H <sub>11</sub> O <sub>3</sub> ), 141.0924 (C <sub>8</sub> H <sub>13</sub> O <sub>2</sub> ), 115.0402 (C <sub>5</sub> H <sub>7</sub> O <sub>3</sub> ), 71.0142 (C <sub>3</sub> H <sub>3</sub> O <sub>2</sub> ), 57.0348 (C <sub>3</sub> H <sub>5</sub> O)                                                                                                                                                                                                                                             |

|                                                   |          |       |      |                                                                                                                                                                                                                                                                                                                                                                                                                                                                                                                                                                              |
|---------------------------------------------------|----------|-------|------|------------------------------------------------------------------------------------------------------------------------------------------------------------------------------------------------------------------------------------------------------------------------------------------------------------------------------------------------------------------------------------------------------------------------------------------------------------------------------------------------------------------------------------------------------------------------------|
| C <sub>19</sub> H <sub>28</sub> O <sub>9</sub> -3 |          | 14.82 | 0.37 | 199.0974 (C <sub>10</sub> H <sub>15</sub> O <sub>4</sub> ), 185.0819 (C <sub>9</sub> H <sub>13</sub> O <sub>4</sub> ), 167.0717 (C <sub>9</sub> H <sub>11</sub> O <sub>3</sub> ), 141.0924 (C <sub>8</sub> H <sub>13</sub> O <sub>2</sub> ), 123.0812 (C <sub>8</sub> H <sub>11</sub> O), 111.0450 (C <sub>8</sub> H <sub>7</sub> O <sub>2</sub> ), 99.0454 (C <sub>5</sub> H <sub>7</sub> O <sub>2</sub> ), 81.0348 (C <sub>5</sub> H <sub>5</sub> O), 71.0142 (C <sub>3</sub> H <sub>3</sub> O <sub>2</sub> ), 57.0348 (C <sub>3</sub> H <sub>5</sub> O)                   |
| C <sub>20</sub> H <sub>30</sub> O <sub>6</sub> -1 | 365.1970 | 16.85 | 0.18 | 199.0974 (C <sub>10</sub> H <sub>15</sub> O <sub>4</sub> ), 183.1027 (C <sub>10</sub> H <sub>15</sub> O <sub>3</sub> ), 181.0870 (C <sub>10</sub> H <sub>13</sub> O <sub>3</sub> ), 141.0924 (C <sub>8</sub> H <sub>13</sub> O <sub>2</sub> ), 139.1127 (C <sub>9</sub> H <sub>15</sub> O), 123.0812 (C <sub>8</sub> H <sub>11</sub> O), 85.0297 (C <sub>4</sub> H <sub>5</sub> O <sub>2</sub> ), 73.0296 (C <sub>3</sub> H <sub>5</sub> O <sub>2</sub> )                                                                                                                    |
| C <sub>20</sub> H <sub>30</sub> O <sub>6</sub> -2 |          | 16.23 | 0.03 | 199.0974 (C <sub>10</sub> H <sub>15</sub> O <sub>4</sub> ), 183.1027 (C <sub>10</sub> H <sub>15</sub> O <sub>3</sub> ), 181.0870 (C <sub>10</sub> H <sub>13</sub> O <sub>3</sub> ), 139.1127 (C <sub>9</sub> H <sub>15</sub> O), 125.0973 (C <sub>8</sub> H <sub>13</sub> O), 97.0662 (C <sub>6</sub> H <sub>9</sub> O), 57.0348 (C <sub>3</sub> H <sub>5</sub> O)                                                                                                                                                                                                           |
| C <sub>20</sub> H <sub>30</sub> O <sub>6</sub> -3 |          | 16.35 | 0.05 | 199.0974 (C <sub>10</sub> H <sub>15</sub> O <sub>4</sub> ), 183.1027 (C <sub>10</sub> H <sub>15</sub> O <sub>3</sub> )                                                                                                                                                                                                                                                                                                                                                                                                                                                       |
| C <sub>20</sub> H <sub>30</sub> O <sub>7</sub> -1 | 381.1912 | 14.58 | 0.06 | 199.0974 (C <sub>10</sub> H <sub>15</sub> O <sub>4</sub> ), 185.0819 (C <sub>9</sub> H <sub>13</sub> O <sub>4</sub> ), 181.0870 (C <sub>10</sub> H <sub>13</sub> O <sub>3</sub> ), 153.0916 (C <sub>9</sub> H <sub>13</sub> O <sub>2</sub> ), 141.0924 (C <sub>8</sub> H <sub>13</sub> O <sub>2</sub> ), 137.0975 (C <sub>9</sub> H <sub>13</sub> O), 123.0812 (C <sub>8</sub> H <sub>11</sub> O), 85.0297 (C <sub>4</sub> H <sub>5</sub> O <sub>2</sub> ), 73.0296 (C <sub>3</sub> H <sub>5</sub> O <sub>2</sub> ), 59.0138 (C <sub>2</sub> H <sub>3</sub> O <sub>2</sub> ) |
| C <sub>20</sub> H <sub>30</sub> O <sub>7</sub> -2 |          | 18.09 | 0.03 | 199.0974 (C <sub>10</sub> H <sub>15</sub> O <sub>4</sub> ), 185.0819 (C <sub>9</sub> H <sub>13</sub> O <sub>4</sub> ), 181.0870 (C <sub>10</sub> H <sub>13</sub> O <sub>3</sub> ), 157.0874(C <sub>8</sub> H <sub>13</sub> O <sub>3</sub> ), 153.0916 (C <sub>9</sub> H <sub>13</sub> O <sub>2</sub> ), 139.0763 (C <sub>8</sub> H <sub>11</sub> O <sub>2</sub> ), 73.0296 (C <sub>3</sub> H <sub>5</sub> O <sub>2</sub> ), 59.0138 (C <sub>2</sub> H <sub>3</sub> O <sub>2</sub> )                                                                                          |
| C <sub>20</sub> H <sub>30</sub> O <sub>7</sub> -3 |          | 17.06 | 0.06 |                                                                                                                                                                                                                                                                                                                                                                                                                                                                                                                                                                              |
| C <sub>20</sub> H <sub>32</sub> O <sub>6</sub> -1 | 367.2125 | 20.69 | 0.35 | 183.1027 (C <sub>10</sub> H <sub>15</sub> O <sub>3</sub> ), 157.0874(C <sub>8</sub> H <sub>13</sub> O <sub>3</sub> ), 139.0766 (C <sub>8</sub> H <sub>13</sub> O <sub>2</sub> ), 59.0138 (C <sub>2</sub> H <sub>3</sub> O <sub>2</sub> )                                                                                                                                                                                                                                                                                                                                     |
| C <sub>20</sub> H <sub>32</sub> O <sub>6</sub> -2 |          | 23.42 | 0.02 | 199.0974 (C <sub>10</sub> H <sub>15</sub> O <sub>4</sub> ), 157.0874(C <sub>8</sub> H <sub>13</sub> O <sub>3</sub> ), 59.0138 (C <sub>2</sub> H <sub>3</sub> O <sub>2</sub> )                                                                                                                                                                                                                                                                                                                                                                                                |
| C <sub>20</sub> H <sub>32</sub> O <sub>6</sub> -3 |          | 16.05 | 0.03 | 199.0974 (C <sub>10</sub> H <sub>15</sub> O <sub>4</sub> ), 185.0819 (C <sub>9</sub> H <sub>13</sub> O <sub>4</sub> ), 167.0717 (C <sub>9</sub> H <sub>11</sub> O <sub>3</sub> ), 141.0924 (C <sub>8</sub> H <sub>13</sub> O <sub>2</sub> ), 137.0973 (C <sub>9</sub> H <sub>13</sub> O), 123.0812 (C <sub>8</sub> H <sub>11</sub> O), 111.0452 (C <sub>6</sub> H <sub>7</sub> O <sub>2</sub> ), 81.0347 (C <sub>5</sub> H <sub>5</sub> O), 71.0142 (C <sub>3</sub> H <sub>3</sub> O <sub>2</sub> ), 57.0348 (C <sub>3</sub> H <sub>5</sub> O)                               |
| C <sub>20</sub> H <sub>32</sub> O <sub>7</sub> -1 | 383.2074 | 18.98 | 0.04 |                                                                                                                                                                                                                                                                                                                                                                                                                                                                                                                                                                              |
| C <sub>20</sub> H <sub>32</sub> O <sub>7</sub> -2 |          | 16.1  | 0.12 |                                                                                                                                                                                                                                                                                                                                                                                                                                                                                                                                                                              |
| C <sub>20</sub> H <sub>32</sub> O <sub>8</sub> -1 | 399.2021 | 18.25 | 0.11 | 241.1080 (C <sub>12</sub> H <sub>17</sub> O <sub>5</sub> ), 199.0974 (C <sub>10</sub> H <sub>15</sub> O <sub>4</sub> ), 183.1027 (C <sub>10</sub> H <sub>15</sub> O <sub>3</sub> ), 181.0870 (C <sub>10</sub> H <sub>13</sub> O <sub>3</sub> ), 167.0717                                                                                                                                                                                                                                                                                                                     |

|                                                   |  |       |      |                                                                                                                                                                                                                                                                                                                                                                                                                                                                                                                                                                                                                                                                                                                                                                                                                                                                                                                                                                                                                                                          |
|---------------------------------------------------|--|-------|------|----------------------------------------------------------------------------------------------------------------------------------------------------------------------------------------------------------------------------------------------------------------------------------------------------------------------------------------------------------------------------------------------------------------------------------------------------------------------------------------------------------------------------------------------------------------------------------------------------------------------------------------------------------------------------------------------------------------------------------------------------------------------------------------------------------------------------------------------------------------------------------------------------------------------------------------------------------------------------------------------------------------------------------------------------------|
| C <sub>20</sub> H <sub>32</sub> O <sub>8</sub> -2 |  | 16.64 | 0.05 | <p>(C<sub>9</sub>H<sub>11</sub>O<sub>3</sub>), 141.0924 (C<sub>8</sub>H<sub>13</sub>O<sub>2</sub>), 135.0814 (C<sub>9</sub>H<sub>11</sub>O), 123.0812 (C<sub>8</sub>H<sub>11</sub>O), 113.0610 (C<sub>6</sub>H<sub>9</sub>O<sub>2</sub>), 85.0297 (C<sub>4</sub>H<sub>5</sub>O<sub>2</sub>), 71.0138 (C<sub>3</sub>H<sub>3</sub>O<sub>2</sub>), 59.0138 (C<sub>2</sub>H<sub>3</sub>O<sub>2</sub>), 57.0348 (C<sub>3</sub>H<sub>5</sub>O)</p> <p>241.1080 (C<sub>12</sub>H<sub>17</sub>O<sub>5</sub>), 199.0974 (C<sub>10</sub>H<sub>15</sub>O<sub>4</sub>), 185.0819 (C<sub>9</sub>H<sub>13</sub>O<sub>4</sub>), 183.1026 (C<sub>10</sub>H<sub>15</sub>O<sub>3</sub>), 153.0916 (C<sub>9</sub>H<sub>13</sub>O<sub>2</sub>), 141.0925 (C<sub>8</sub>H<sub>13</sub>O<sub>2</sub>), 125.0971 (C<sub>8</sub>H<sub>13</sub>O), 113.0610 (C<sub>6</sub>H<sub>9</sub>O<sub>2</sub>), 95.0504 (C<sub>6</sub>H<sub>7</sub>O), 69.0347 (C<sub>4</sub>H<sub>5</sub>O), 59.0139 (C<sub>2</sub>H<sub>3</sub>O<sub>2</sub>), 57.0348 (C<sub>3</sub>H<sub>5</sub>O)</p> |
|---------------------------------------------------|--|-------|------|----------------------------------------------------------------------------------------------------------------------------------------------------------------------------------------------------------------------------------------------------------------------------------------------------------------------------------------------------------------------------------------------------------------------------------------------------------------------------------------------------------------------------------------------------------------------------------------------------------------------------------------------------------------------------------------------------------------------------------------------------------------------------------------------------------------------------------------------------------------------------------------------------------------------------------------------------------------------------------------------------------------------------------------------------------|



**Table S3:** Organics identified in the paper with their GECKO-A exact and similar matches from the GECKO-A mechanism.

| Structure                                                                           | Reference*       | GECKO-A name<br>(molecular formula)                         | Other GECKO-A species with the same formula                                                    |                                                                                                 |                                                                                                 |
|-------------------------------------------------------------------------------------|------------------|-------------------------------------------------------------|------------------------------------------------------------------------------------------------|-------------------------------------------------------------------------------------------------|-------------------------------------------------------------------------------------------------|
| 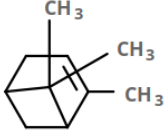   | $\alpha$ -pinene | APINEN<br>(C <sub>10</sub> H <sub>16</sub> )                | -                                                                                              |                                                                                                 |                                                                                                 |
|    | Figure 4d - 2    | TD9000<br>(C <sub>9</sub> H <sub>14</sub> O <sub>2</sub> )  | <br>TD900B   |                                                                                                 |                                                                                                 |
|  | Figure 4d - 3    | 4T0002<br>(C <sub>10</sub> H <sub>16</sub> O <sub>3</sub> ) | <br>4T0003 | <br>4T0001 | <br>4T0000 |
|  | Figure 4d - 4    | 1T9004<br>(C <sub>9</sub> H <sub>16</sub> O <sub>2</sub> )  | <br>1T90dz |                                                                                                 |                                                                                                 |
|  | Figure 4e - 1    | TG9000<br>(C <sub>9</sub> H <sub>14</sub> O <sub>4</sub> )  | <br>TG900o | <br>TG9001 |                                                                                                 |

|                                                                                     |               |                      |                                                                                      |
|-------------------------------------------------------------------------------------|---------------|----------------------|--------------------------------------------------------------------------------------|
| 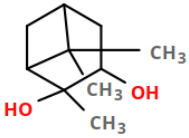   | Figure 4e - 3 | TT000D<br>(C10H18O2) | -                                                                                    |
|    | Figure 5d - 1 | 3T9001<br>(C9H13O5)  |   |
|  | Figure 5d - 2 | 3D8000<br>(C8H13O5)  |  |

|                                                                                   |               |        |                                                                                                                                                      |
|-----------------------------------------------------------------------------------|---------------|--------|------------------------------------------------------------------------------------------------------------------------------------------------------|
| 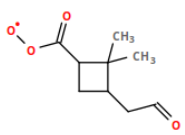 | Figure 5e - 1 | 3T9000 | <br>3T902z                      3T902Y                      3T9003 |
|  | Figure 5e - 2 | 3A8004 | <br>3A801J                      3A8005                             |

\* "-N" indicates the order of compounds in the reaction (left to right: 1, 2, 3, ...). If not listed in the table, no exact match was found in the GECKO-A mechanism.

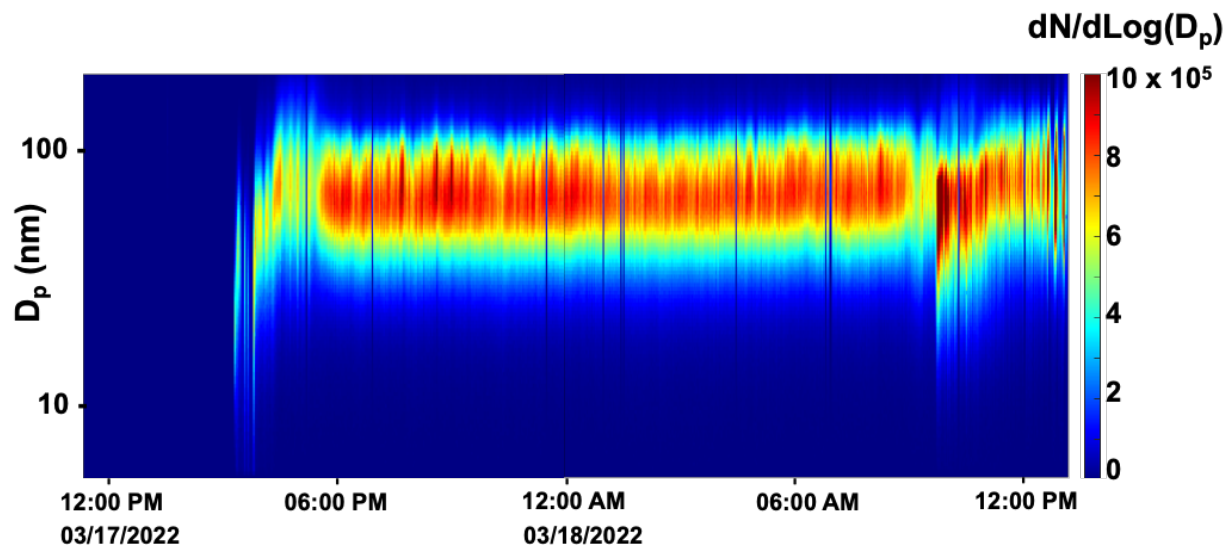

**Figure S1.** Average size distribution of nanoparticles during the  $\alpha$ -pinene ozonolysis flow-tube experiment, where  $[\alpha\text{-pinene}] = 238$  ppb,  $[\text{ozone}] = 1200$  ppb,  $T = 298$  K,  $\text{RH} < 10\%$ ,  $[\text{OH}] = 1.6$  ppt and residence time = 150 s. The experiment generated  $135 \pm 23 \mu\text{g m}^{-3}$   $\alpha$ -pinene-derived particles with 70 nm mean diameter.

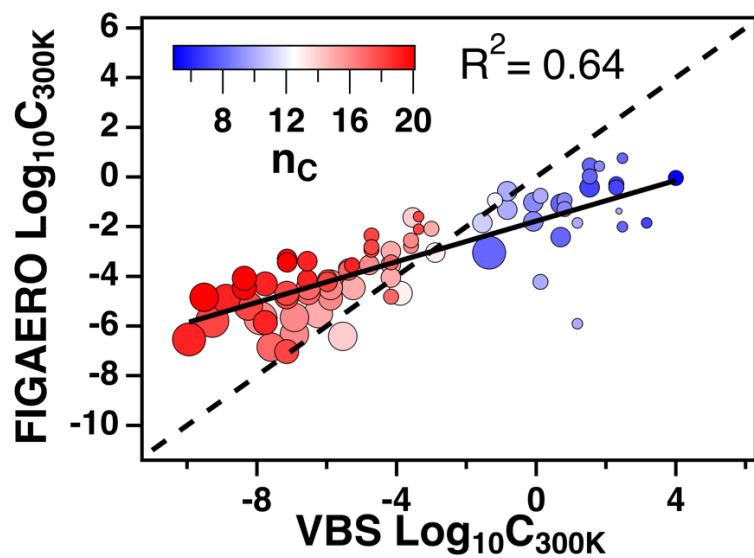

Figure S2. Correlation plot between FIGAERO-measured and VBS-calculated volatility.

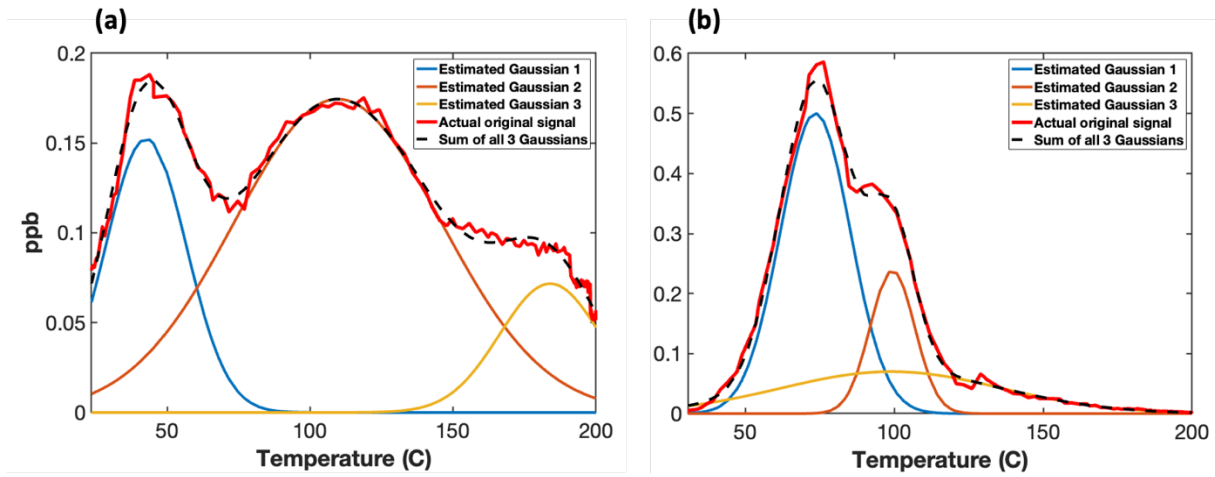

**Figure S3.** The FIGAERO thermogram of  $C_8H_{14}O_5$  (a) and  $C_{20}H_{32}O_6$  (b) showing multiple desorption peaks due to thermal fragmentation or the presence of isomers.

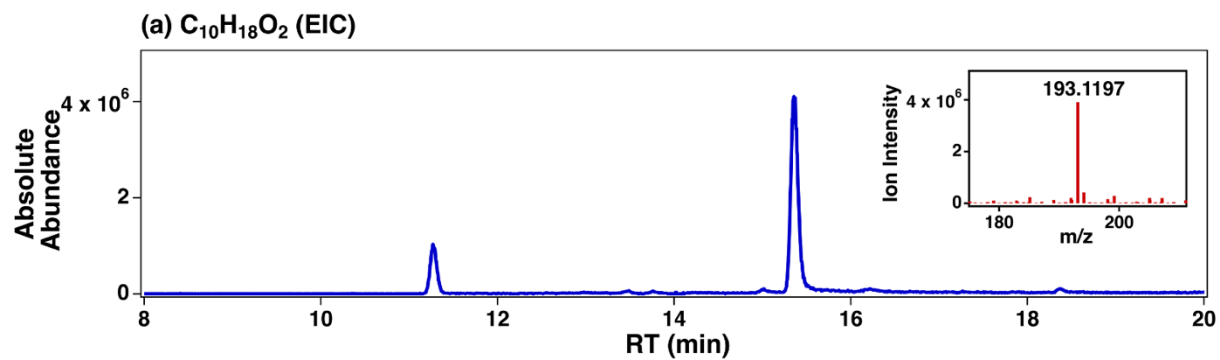

**Figure S4.** The EIC of  $C_{10}H_{18}O_2$  ( $\alpha$ -pinanediol) with sodium adduct  $[M+Na]^+$  ( $m/z = 193.1197$ ). Showing the presence of  $\alpha$ -pinanediol in the particle phase. The inset figure shows the mass spectra at RT = 15.3 min.

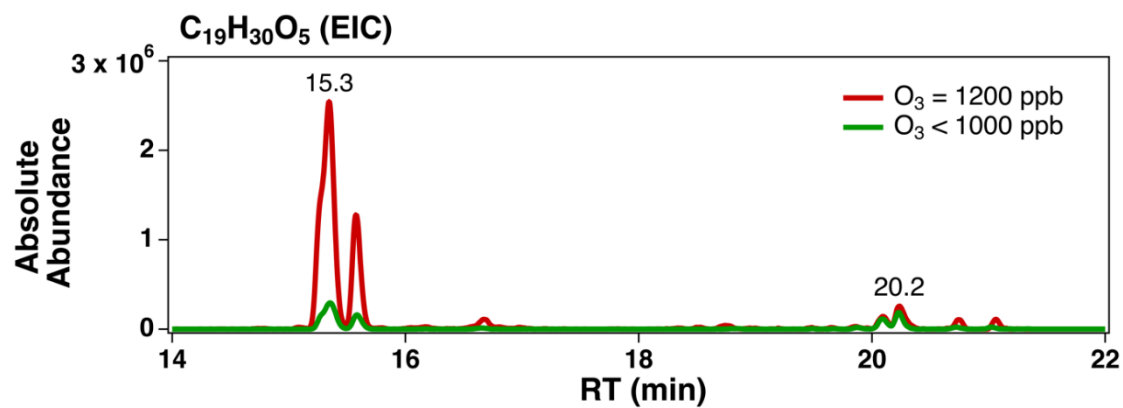

**Figure S5.** The variation in abundance of C<sub>19</sub>H<sub>30</sub>O<sub>5</sub> isomers at different ozone concentrations: the experiment with ozone kept at 1200 ppb (red), and the experiment with ozone varying from 250 ppb to 1000 ppb (green). The RT= 15.3 and 20.2 are two identified isomers C<sub>19</sub>H<sub>30</sub>O<sub>5</sub>-1 (gas-phase product) and C<sub>19</sub>H<sub>30</sub>O<sub>5</sub>-2 (particle-phase product), respectively.



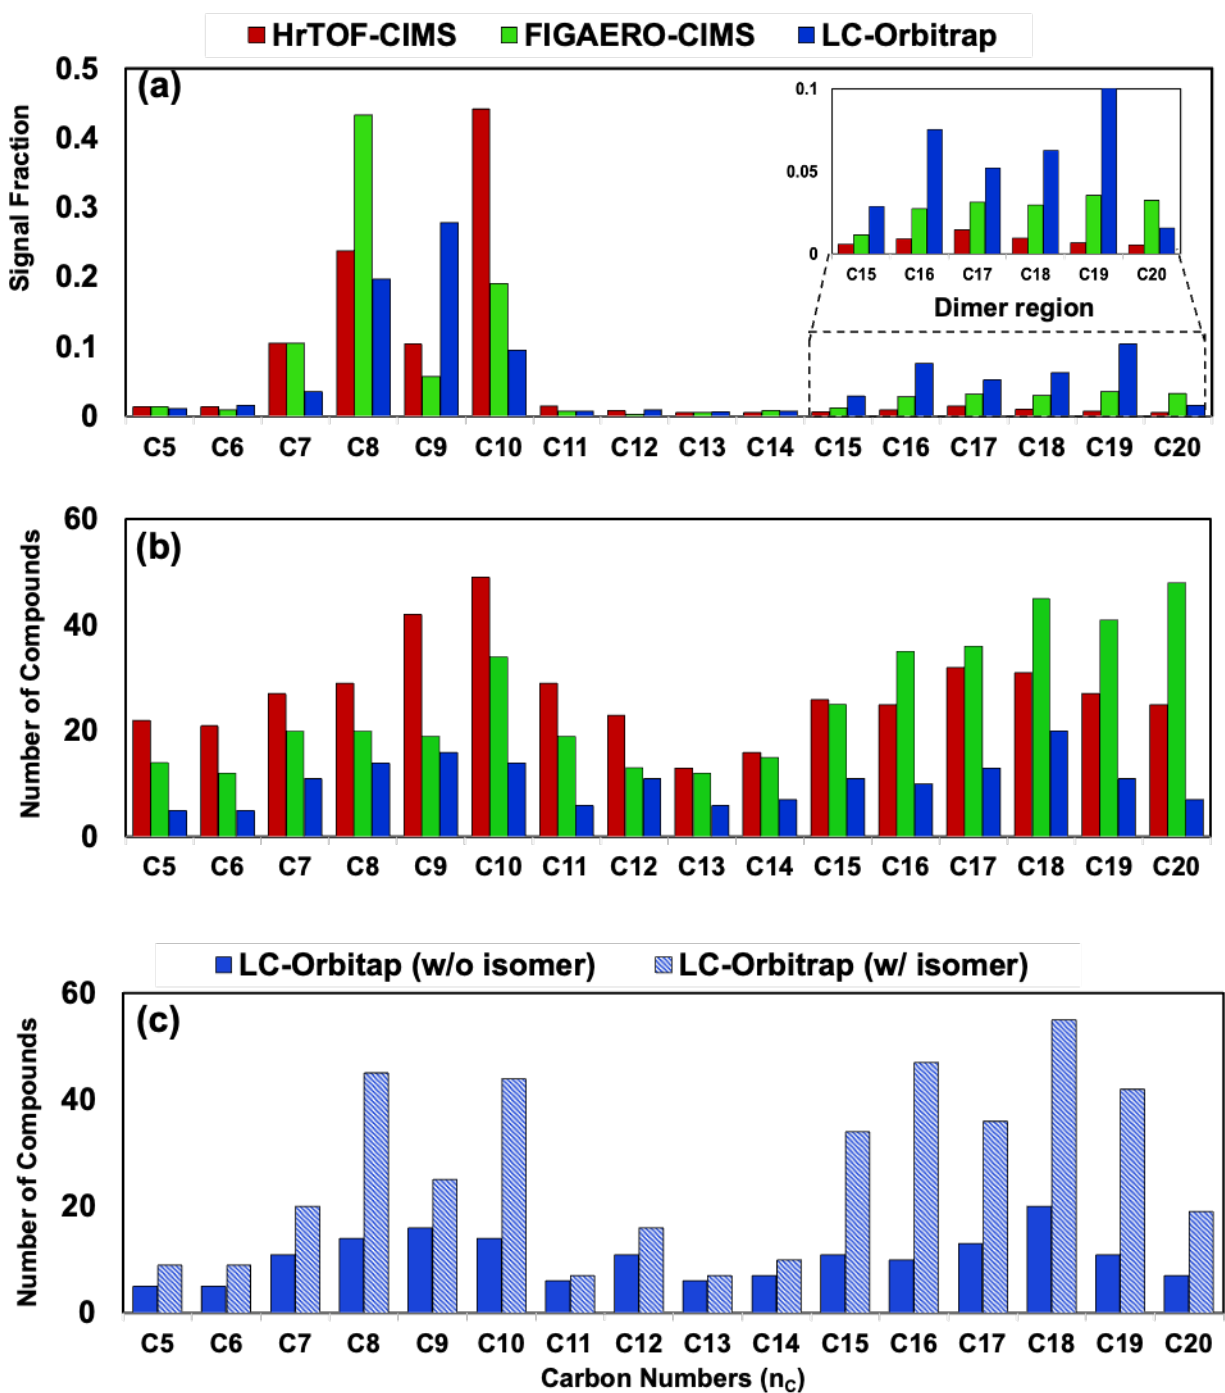

**Figure S6.** (a) The cumulative signal fraction of dimer OOMs detected in the experiment classified based on their carbon numbers (b) The number of distinct OOMs detected with HrTOF-CIMS (gas-phase), FIGAERO-CIMS and LC-Orbitrap MS (particle-phase). (c) The number of OOMs with (light blue, striped) and without (solid blue) isomers detected by LC-Orbitrap MS and classified based on their carbon numbers.

**A**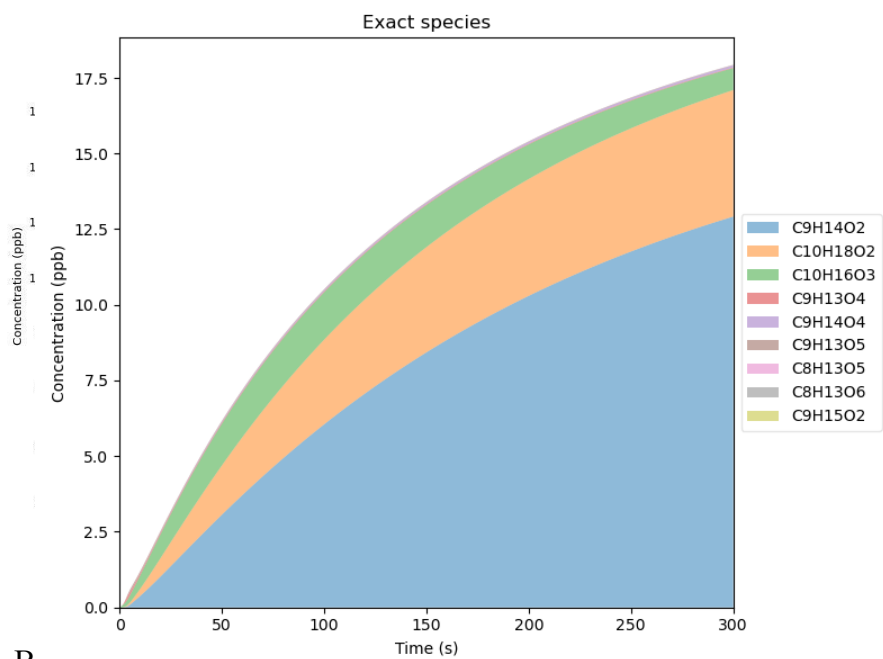**B**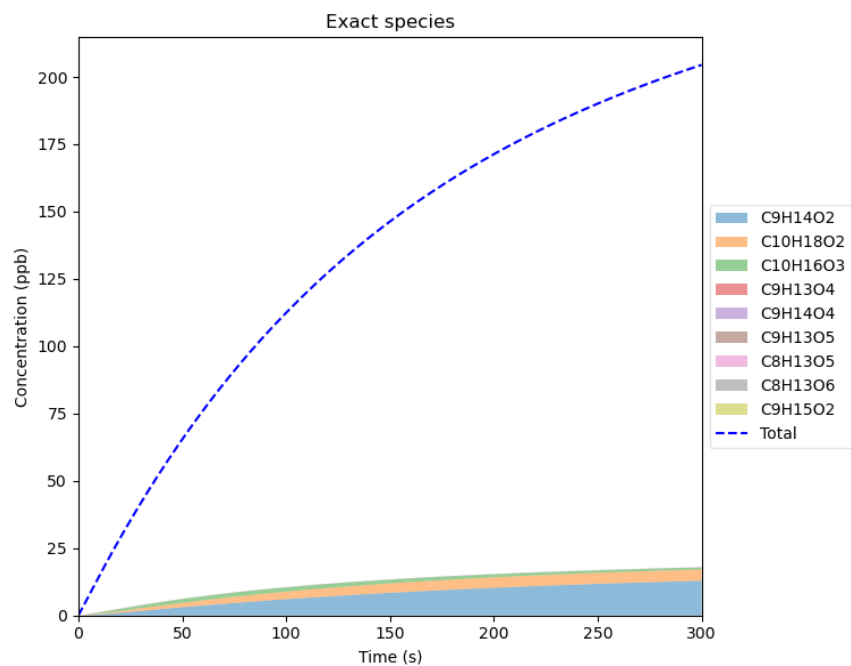

**Figure S7.** (a) Time-dependent concentrations (gas + particle) of exact species based on GECKO-A model simulations. (b) Time-dependent concentrations (gas + particle) of all products (blue dotted line) and exact species based on GECKO-A model simulations.



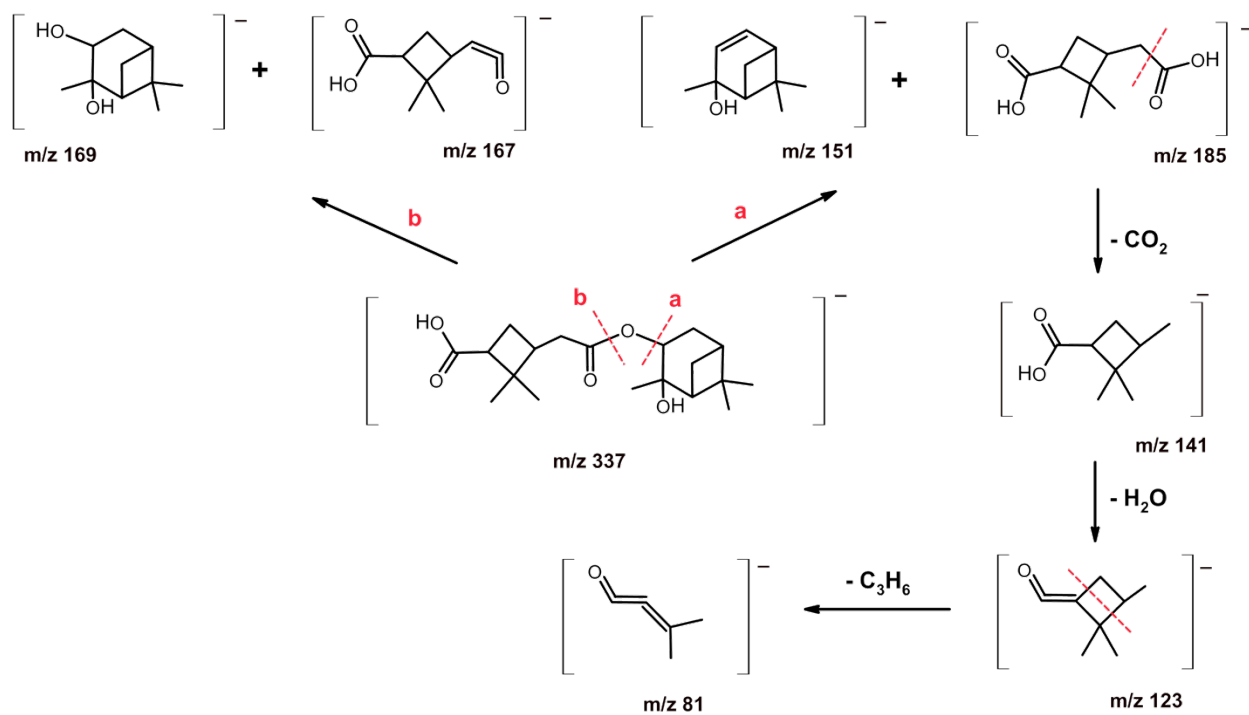

**Scheme S2:** The proposed fragmentation pathway for the  $C_{19}H_{30}O_5-2$  isomer.

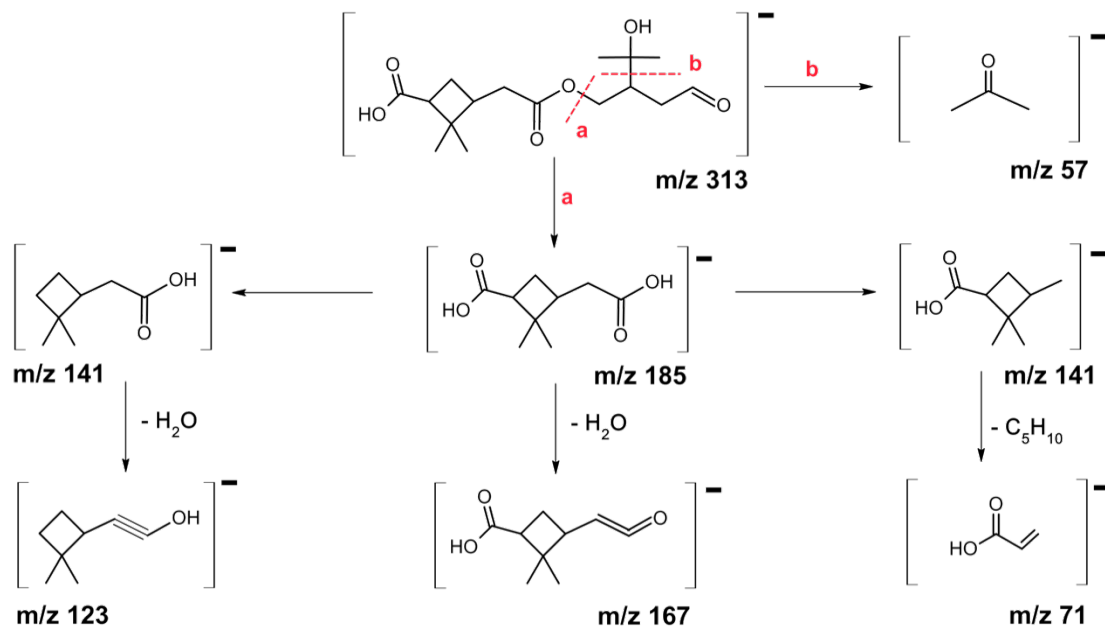

**Scheme S3:** Proposed fragmentation pathway for the  $C_{16}H_{26}O_6-1$  isomer.

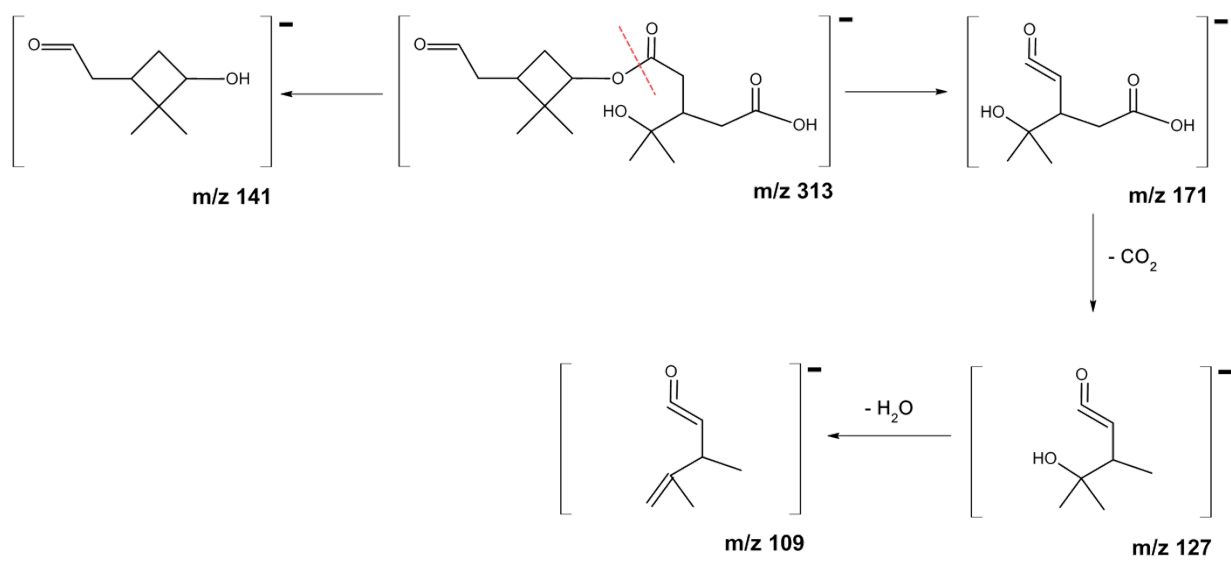

**Scheme S4:** Proposed fragmentation pathway for the  $C_{16}H_{26}O_6-2$  isomer.

## Supplement References:

- Aumont, B., S. Szopa, and S. Madronich (2005), Modelling the evolution of organic carbon during its gas-phase tropospheric oxidation: development of an explicit model based on a self generating approach, *Atmos. Chem. Phys.*, *15*, 2497-2517, doi:10.5194/acp-5-2497-2005.
- Camredon, M., B. Aumont, J. Lee-Taylor, and S. Madronich (2007), The SOA/VOC/NO<sub>x</sub> system: an explicit model of secondary organic aerosol formation, *Atmos. Chem. Phys.*, *7*(21), 5599-5610, doi:10.5194/acp-7-5599-2007.
- Donahue, N. M., S. A. Epstein, S. N. Pandis, and A. L. Robinson (2011), A two-dimensional volatility basis set: 1. organic-aerosol mixing thermodynamics, *Atmos. Chem. Phys.*, *11*(7), 3303-3318, doi:10.5194/acp-11-3303-2011.
- Jenkin, M. E., R. Valorso, B. Aumont, M. J. Newland, and A. R. Rickard (2020), Estimation of rate coefficients for the reactions of O<sub>3</sub> with unsaturated organic compounds for use in automated mechanism construction, *Atmos. Chem. Phys.*, *20*(21), 12921-12937, doi:10.5194/acp-20-12921-2020.
- Jenkin, M. E., R. Valorso, B. Aumont, and A. R. Rickard (2019), Estimation of rate coefficients and branching ratios for reactions of organic peroxy radicals for use in automated mechanism construction, *Atmos. Chem. Phys.*, *19*(11), 7691-7717, doi:10.5194/acp-19-7691-2019.
- Jenkin, M. E., R. Valorso, B. Aumont, A. R. Rickard, and T. J. Wallington (2018), Estimation of rate coefficients and branching ratios for gas-phase reactions of OH with aliphatic organic compounds for use in automated mechanism construction, *Atmos. Chem. Phys.*, *18*(13), 9297-9328, doi:10.5194/acp-18-9297-2018.
- Mohr, C., et al. (2019), Molecular identification of organic vapors driving atmospheric nanoparticle growth, *Nature Communications*, *10*(1), 4442, doi:10.1038/s41467-019-12473-2.
- Valorso, R., B. Aumont, M. Camredon, T. Raventos-Duran, C. Mouchel-Vallon, N. L. Ng, J. H. Seinfeld, J. Lee-Taylor, and S. Madronich (2011), Explicit modelling of SOA formation from  $\alpha$ -pinene photooxidation: sensitivity to vapour pressure estimation, *Atmos. Chem. Phys.*, *11*(14), 6895-6910, doi:10.5194/acp-11-6895-2011.
